# Supplementary material for: Niclosamide: CRL4AMBRA1 mediated degradation of cyclin D1 following mitochondrial membrane depolarization
Source: RSC Med Chem. 2025 May 6;16(7):3049–57. doi: 10.1039/d5md00054h (PMC12054360; doi:10.1039/d5md00054h)
Supplement: MD-016-D5MD00054H-s002 [file MD-016-D5MD00054H-s002.xlsx]

## Sheet: HCT116
ac	geneName	idScore	idQValue	nbPeptides	log2ratio_Niclosamide/DMSO	pValue_Niclosamide/DMSO
A0A0B4J2D5	GATD3B	16	0	10	0.0297484	0.812126
A0A0U1RRE5	NBDY	4	0	2	-0.078972	0.36005
A0A1B0GUW7	SMIM27	1	0.000130924	1	-0.336138	0.155562
A0AV02	SLC12A8	1	0.000130924	1	-0.087536	0.927102
A0AV96	RBM47	1	0.000130924	1	-0.198899	0.413
A0AVK6	E2F8	2	0	2	0.185456	0.206682
A0AVT1	UBA6	48	0	32	-0.0746731	0.781335
A0FGR8	ESYT2	16	0	11	0.153626	0.442508
A0JLT2	MED19	2	0	2	0.204979	0.663704
A0JNW5	UHRF1BP1L	5	0	5	-0.0337851	0.843145
A0MZ66	SHTN1	29	0	24	-0.0114518	0.417584
A0PJW6	TMEM223	1	0.000130924	1	0.0257155	0.848822
A1A4S6	ARHGAP10	7	0	6	-0.106241	0.481497
A1A5C7	SLC22A23	1	0.000130924	1	0.326794	0.463778
A1L0T0	ILVBL	9	0	7	0.111707	0.489465
A1L188	NDUFAF8	1	0.000130924	1	-0.109177	0.967433
A1L390	PLEKHG3	9	0	7	0.0416897	0.766727
A1L3X0	ELOVL7	2	0	1	-0.184992	0.807493
A1X283	SH3PXD2B	13	0	9	-0.0873304	0.39701
A1XBS5	FAM92A	10	0	7	-0.191126	0.085877
A2RRP1	NBAS	21	0	16	0.00277477	0.84557
A2RTX5	TARS3	2	0	2	-0.0239498	0.897197
A2RU67	FAM234B	1	0.000130924	1	0.273156	0.104825
A2RUC4	TYW5	1	0.000130924	1	-0.082551	0.685174
A2VDF0	FUOM	1	0.000130924	1	0.332381	0.977017
A3KMH1	VWA8	35	0	30	-0.0475236	0.643563
A3KN83	SBNO1	16	0	14	-0.141846	0.195728
A4D1E9	GTPBP10	12	0	9	-0.121483	0.869189
A4D1P6	WDR91	1	0.000130924	1	0.127632	0.0678668
A4D1U4	DENND11	2	0	2	-0.0207133	0.543605
A5D8V6	VPS37C	1	0.000130924	1	0.037246	0.39571
A5PLN9	TRAPPC13	6	0	5	-0.179199	0.123018
A5YKK6	CNOT1	68	0	44	-0.127475	0.39315
A6NCE7	MAP1LC3B2	2	0	1	0.52925	0.00602082
A6NCW0	USP17L3	1	0.000130924	1	-0.214949	0.446129
A6ND36	FAM83G	4	0	4	-0.175547	0.219019
A6NDG6	PGP	25	0	12	-0.0394875	0.933755
A6NDU8	C5orf51	5	0	4	-0.102351	0.585411
A6NFI3	ZNF316	1	0.000130924	1	0.486033	0.334769
A6NGR9	MROH6	1	0.000130924	1	0.363148	0.753204
A6NGU5	GGT3P	2	0	1	0.21623	0.813055
A6NHQ4	EPOP	1	0.000130924	1	0.0176765	0.892323
A6NHR9	SMCHD1	62	0	47	-0.0899637	0.979727
A6NI28	ARHGAP42	3	0	3	-0.104971	0.175486
A6NIH7	UNC119B	3	0	2	0.0805176	0.97256
A6NJ78	METTL15	2	0	2	-0.0153769	0.695972
A6NJT0	UNCX	1	0.000130924	1	0.107648	0.979824
A6NJZ7	RIMBP3C	1	0.000130924	1	0.006162	0.984118
A6NKD9	CCDC85C	7	0	5	0.251906	0.973791
A6NKF1	SAC3D1	3	0	3	0.163274	0.185797
A6NKX4	SLC22A31	1	0.000130924	1	-0.172876	0.06311
A6NNL5	C15orf61	1	0.000130924	1	-0.0917952	0.410994
A6QL63	BTBD11	2	0	2	-0.357427	0.165165
A6ZKI3	RTL8C	1	0.000130924	1	-0.100759	0.777174
A7E2V4	ZSWIM8	3	0	3	-0.104005	0.350286
A7KAX9	ARHGAP32	2	0	2	-0.200844	0.141031
A8CG34	POM121C	12	0	10	0.342311	0.0330118
A8K8P3	SFI1	1	0.000130924	1	-0.576139	0.0241846
A8MSI8	LYRM9	1	0.000130924	1	0.321816	0.395836
A8MT69	CENPX	4	0	3	0.123078	0.949854
A8MVW0	FAM171A2	2	0	2	0.100561	0.84661
A8MW92	PHF20L1	4	0	4	0.0479861	0.443705
A8MXV4	NUDT19	8	0	6	0.031623	0.797115
A9UHW6	MIF4GD	1	0.000130924	1	-0.0773116	0.771122
B1AK53	ESPN	8	0	7	0.0598159	0.748249
B2RBV5	NA	3	0	3	-0.296014	0.0396468
B2RTY4	MYO9A	1	0.000130924	1	-0.0487485	0.310842
B7ZAQ6	GPR89A	1	0.000130924	1	0.204706	0.160425
C4AMC7	WASH3P	5	0	5	-0.00920409	0.551939
C9J798	RASA4B	1	0.000130924	1	-0.283455	0.840865
C9JLW8	MCRIP1	5	0	4	0.272016	0.580976
E9PAV3	NACA	16	0	4	-0.241156	0.0191483
E9PRG8	C11orf98	9	0	4	0.0121861	0.955309
L0R6Q1	SLC35A4	3	0	2	0.0946498	0.990134
L0R819	ASDURF	7	0	4	0.0182096	0.742886
L0R8F8	MIEF1	2	0	1	-0.0812452	0.324904
O00115	DNASE2	7	0	5	-0.053662	0.973292
O00116	AGPS	27	0	20	0.0669084	0.33492
O00124	UBXN8	1	0.000130924	1	-0.21529	0.146871
O00139	KIF2A	18	0	13	0.0459375	0.548743
O00148	DDX39A	11	0	6	-0.0797037	0.809171
O00151	PDLIM1	21	0	13	0.0597885	0.728582
O00154	ACOT7	20	0	8	-0.0520172	0.92416
O00159	MYO1C	45	0	30	0.0556859	0.930561
O00161	SNAP23	14	0	10	-0.011019	0.377629
O00165	HAX1	4	0	3	0.0158715	0.757587
O00170	AIP	11	0	9	-0.0127851	0.719018
O00178	GTPBP1	10	0	8	0.0364995	0.844549
O00186	STXBP3	12	0	8	-0.0883229	0.597541
O00189	AP4M1	1	0.000130924	1	0.0235198	0.844862
O00192	ARVCF	2	0	2	0.619922	0.264621
O00193	SMAP	10	0	3	-0.0401606	0.991024
O00194	RAB27B	1	0.000130924	1	0.384759	0.145236
O00203	AP3B1	37	0	24	-0.0723835	0.658192
O00212	RHOD	2	0	2	-0.0853678	0.783309
O00214	LGALS8	7	0	5	-0.0934452	0.453704
O00217	NDUFS8	12	0	4	0.0626307	0.801266
O00220	TNFRSF10A	7	0	4	0.114864	0.586581
O00221	NFKBIE	3	0	3	0.0349508	0.354837
O00231	PSMD11	46	0	21	-0.136449	0.677039
O00232	PSMD12	42	0	18	-0.0222616	0.771058
O00233	PSMD9	19	0	8	0.000677056	0.873741
O00244	ATOX1	4	0	3	-0.201833	0.122518
O00255	MEN1	6	0	5	0.0307974	0.452631
O00257	CBX4	6	0	5	0.0373111	0.595233
O00264	PGRMC1	11	0	6	-0.0279389	0.74065
O00267	SUPT5H	31	0	22	0.0458172	0.864369
O00268	TAF4	12	0	11	-0.062334	0.87353
O00273	DFFA	7	0	5	-0.0596987	0.990639
O00291	HIP1	16	0	13	0.0168254	0.617512
O00299	CLIC1	62	0	14	-0.0228335	0.437421
O00303	EIF3F	26	0	12	-0.0104196	0.702712
O00308	WWP2	2	0	2	-0.223656	0.8805
O00311	CDC7	2	0	2	-0.273425	0.771015
O00327	ARNTL	1	0.000130924	1	-0.118886	0.369725
O00329	PIK3CD	1	0.000130924	1	0.167022	0.968307
O00330	PDHX	13	0	8	0.00312193	0.41442
O00391	QSOX1	1	0.000130924	1	0.750106	0.000326789
O00399	DCTN6	9	0	6	-0.0238259	0.634574
O00400	SLC33A1	4	0	4	0.0885786	0.385218
O00401	WASL	8	0	6	0.0139782	0.647548
O00408	PDE2A	1	0.000130924	1	-0.305475	0.0624004
O00410	IPO5	127	0	37	-0.00288479	0.850949
O00411	POLRMT	32	0	24	-0.119868	0.231384
O00418	EEF2K	8	0	7	0.114014	0.480466
O00422	SAP18	11	0	8	0.0806275	0.266398
O00423	EML1	3	0	3	0.0839649	0.494745
O00425	IGF2BP3	27	0	15	-0.0480227	0.764727
O00429	DNM1L	51	0	30	-0.0577051	0.568241
O00442	RTCA	9	0	5	-0.116787	0.749212
O00443	PIK3C2A	14	0	12	-0.0571954	0.33306
O00444	PLK4	1	0.000130924	1	0.232915	0.246632
O00458	IFRD1	3	0	3	0.282655	0.0130657
O00459	PIK3R2	4	0	3	-0.186306	0.0406736
O00461	GOLIM4	5	0	5	-0.534698	0.000497306
O00462	MANBA	1	0.000130924	1	-0.116884	0.900246
O00468	AGRN	1	0.000130924	1	0.394611	0.0137765
O00469	PLOD2	4	0	4	0.0704734	0.311853
O00471	EXOC5	17	0	13	-0.062779	0.596804
O00479	HMGN4	3	0	3	0.0753714	0.541734
O00483	NDUFA4	8	0	3	-0.141329	0.116418
O00487	PSMD14	28	0	13	0.0389248	0.322211
O00488	ZNF593	8	0	4	-0.0948028	0.315002
O00499	BIN1	9	0	6	-0.0317179	0.595262
O00505	KPNA3	11	0	9	-0.053024	0.64417
O00506	STK25	4	0	3	0.148546	0.687814
O00512	BCL9	2	0	2	0.100153	0.791091
O00515	LAD1	30	0	18	0.147337	0.425045
O00519	FAAH	3	0	3	0.0672855	0.428011
O00522	KRIT1	2	0	2	-0.271063	0.0857032
O00534	VWA5A	1	0.000130924	1	0	0.650713
O00541	PES1	37	0	21	-0.101607	0.92752
O00559	EBAG9	1	0.000130924	1	0.417235	0.182403
O00560	SDCBP	5	0	4	0.0462218	0.653118
O00562	PITPNM1	1	0.000130924	1	-0.409486	0.908413
O00566	MPHOSPH10	15	0	12	-0.047173	0.620718
O00567	NOP56	57	0	29	0.00922513	0.749226
O00571	DDX3X	90	0	38	-0.113056	0.488263
O00584	RNASET2	4	0	3	0.0152053	0.920772
O00592	PODXL	8	0	6	0.0333658	0.508787
O00622	CCN1	13	0	10	1.82372	8.79916e-07
O00623	PEX12	1	0.000130924	1	-0.00538228	0.813631
O00625	PIR	11	0	6	-0.184939	0.116103
O00628	PEX7	1	0.000130924	1	-0.0286488	0.518249
O00629	KPNA4	7	0	6	-0.0652873	0.240061
O00635	TRIM38	2	0	2	0.192363	0.825836
O00712	NFIB	2	0	1	-0.2387	0.471955
O00716	E2F3	1	0.000130924	1	0.160758	0.419241
O00743	PPP6C	16	0	10	-0.0507285	0.744341
O00748	CES2	1	0.000130924	1	0.116021	0.518094
O00754	MAN2B1	16	0	13	-0.00219848	0.500751
O00762	UBE2C	13	0	9	-0.092816	0.259507
O00764	PDXK	12	0	8	0.271576	0.613623
O00767	SCD	3	0	2	-0.433959	0.0038569
O14497	ARID1A	20	0	16	0.081512	0.417824
O14503	BHLHE40	1	0.000130924	1	1.05973	0.000930897
O14519	CDK2AP1	3	0	3	0.109253	0.766078
O14521	SDHD	2	0	2	0.111754	0.525894
O14523	C2CD2L	3	0	3	0.279607	0.27799
O14524	NEMP1	3	0	2	-0.115858	0.728318
O14526	FCHO1	1	0.000130924	1	-0.238267	0.0738817
O14530	TXNDC9	5	0	3	-0.205595	0.104091
O14531	DPYSL4	1	0.000130924	1	-0.425852	0.0218635
O14544	SOCS6	5	0	5	-0.348012	0.0283766
O14545	TRAFD1	7	0	5	0.204295	0.878549
O14548	COX7A2L	3	0	3	-0.406407	0.0282102
O14561	NDUFAB1	9	0	3	0.0706101	0.657984
O14562	UBFD1	16	0	9	0.060368	0.835291
O14578	CIT	19	0	18	-0.0607001	0.684462
O14579	COPE	14	0	10	-0.0783755	0.523423
O14593	RFXANK	2	0	2	-0.171335	0.357604
O14617	AP3D1	40	0	24	-0.108472	0.472227
O14618	CCS	10	0	7	0.0997384	0.582665
O14639	ABLIM1	7	0	6	0.110132	0.521395
O14640	DVL1	5	0	5	-0.136543	0.198097
O14641	DVL2	13	0	9	-0.000357987	0.904401
O14646	CHD1	30	0	22	-0.0317148	0.767138
O14647	CHD2	11	0	10	0.0101884	0.959502
O14653	GOSR2	8	0	6	0.000615269	0.627042
O14656	TOR1A	3	0	3	0.00971645	0.888141
O14657	TOR1B	4	0	4	0.189647	0.47255
O14662	STX16	3	0	2	0.147383	0.449532
O14672	ADAM10	11	0	10	0.199081	0.0400317
O14681	EI24	2	0	2	-0.368562	0.287027
O14683	TP53I11	2	0	2	-0.0575501	0.641018
O14684	PTGES	1	0.000130924	1	0.0171913	0.992977
O14686	KMT2D	3	0	3	0.133617	0.76468
O14713	ITGB1BP1	1	0.000130924	1	0.156573	0.792548
O14715	RGPD8	2	0	1	0.0786665	0.279721
O14717	TRDMT1	2	0	2	-0.0402084	0.323698
O14727	APAF1	2	0	2	0.0234761	0.990826
O14730	RIOK3	3	0	3	-0.190951	0.20815
O14732	IMPA2	3	0	2	-0.213922	0.20514
O14733	MAP2K7	9	0	7	-0.182701	0.281794
O14734	ACOT8	2	0	2	-0.0151379	0.521959
O14735	CDIPT	8	0	4	-0.0518056	0.616242
O14737	PDCD5	11	0	6	-0.0975165	0.568351
O14744	PRMT5	32	0	19	-0.120734	0.412947
O14745	SLC9A3R1	21	0	14	0.0445848	0.894978
O14757	CHEK1	19	0	11	-0.218766	0.380232
O14763	TNFRSF10B	5	0	5	0.243477	0.0173174
O14772	FPGT	1	0.000130924	1	-0.121595	0.492252
O14773	TPP1	6	0	5	-0.0255647	0.383482
O14775	GNB5	3	0	3	-0.403593	0.00362311
O14776	TCERG1	40	0	24	0.0816474	0.719762
O14777	NDC80	25	0	19	-0.159563	0.656325
O14787	TNPO2	19	0	12	-0.00587522	0.792826
O14795	UNC13B	2	0	2	-0.326732	0.0828517
O14802	POLR3A	21	0	20	-0.0586348	0.676777
O14817	TSPAN4	1	0.000130924	1	0.26024	0.259449
O14818	PSMA7	27	0	15	-0.113541	0.773898
O14828	SCAMP3	17	0	10	0.0223404	0.655612
O14841	OPLAH	6	0	6	0.138318	0.211976
O14874	BCKDK	5	0	3	-0.11888	0.264073
O14879	IFIT3	1	0.000130924	1	0.0135735	0.783448
O14880	MGST3	1	0.000130924	1	0.0645609	0.26457
O14893	GEMIN2	4	0	4	0.0307125	0.80595
O14896	IRF6	2	0	2	-0.11791	0.827246
O14907	TAX1BP3	5	0	3	-0.0551932	0.307325
O14908	GIPC1	17	0	12	-0.177599	0.284384
O14920	IKBKB	4	0	4	0.122368	0.216695
O14924	RGS12	4	0	4	0.105533	0.769993
O14925	TIMM23	3	0	3	-0.0294247	0.630379
O14929	HAT1	17	0	10	-0.00981846	0.81883
O14936	CASK	14	0	11	0.00802598	0.642875
O14939	PLD2	11	0	9	0.0533313	0.928078
O14944	EREG	1	0.000130924	1	-0.267139	0.173887
O14949	UQCRQ	6	0	4	-0.119389	0.162728
O14950	MYL12B	18	0	4	0.120958	0.708921
O14957	UQCR11	1	0.000130924	1	0.259326	0.22562
O14964	HGS	26	0	17	0.0334894	0.968312
O14965	AURKA	6	0	6	-0.196121	0.0623104
O14966	RAB29	3	0	3	-0.0281362	0.682023
O14972	VPS26C	1	0.000130924	1	-0.172911	0.172975
O14974	PPP1R12A	38	0	25	-0.00296533	0.906624
O14975	SLC27A2	4	0	4	-0.300368	0.754775
O14976	GAK	38	0	31	-0.0420007	0.736226
O14979	HNRNPDL	36	0	16	0.0938109	0.379677
O14980	XPO1	108	0	36	-0.0229731	0.910538
O14981	BTAF1	41	0	34	-0.061668	0.989184
O15013	ARHGEF10	8	0	8	0.0150848	0.881965
O15014	ZNF609	5	0	5	-0.0200516	0.839313
O15015	ZNF646	2	0	2	0.176074	0.539983
O15020	SPTBN2	10	0	10	0.146034	0.521589
O15027	SEC16A	19	0	17	0.0442877	0.639027
O15031	PLXNB2	31	0	27	0.0648379	0.261925
O15037	KHNYN	3	0	3	-0.166022	0.128733
O15040	TECPR2	1	0.000130924	1	-0.346083	0.676339
O15042	U2SURP	41	0	25	0.0545099	0.581342
O15047	SETD1A	9	0	8	0.0227306	0.669288
O15049	N4BP3	1	0.000130924	1	-0.21583	0.402385
O15056	SYNJ2	2	0	2	-0.093602	0.474892
O15062	ZBTB5	1	0.000130924	1	-0.374937	0.0934923
O15063	GARRE1	2	0	2	-0.0346352	0.425008
O15066	KIF3B	8	0	8	-0.118715	0.26965
O15067	PFAS	53	0	31	-0.0363797	0.627319
O15078	CEP290	1	0.000130924	1	-1.44995	0.00739968
O15084	ANKRD28	9	0	7	0.0307972	0.928926
O15085	ARHGEF11	6	0	6	-0.0231334	0.912564
O15091	PRORP	16	0	10	-0.0976792	0.353404
O15111	CHUK	23	0	17	-0.0292889	0.648701
O15116	LSM1	3	0	3	0.259094	0.696766
O15118	NPC1	7	0	4	0.130062	0.27124
O15121	DEGS1	3	0	3	-0.127033	0.122305
O15126	SCAMP1	7	0	5	-0.122357	0.930982
O15127	SCAMP2	6	0	4	0.044521	0.527992
O15143	ARPC1B	13	0	9	-0.0577813	0.52858
O15144	ARPC2	23	0	13	-0.0677024	0.591448
O15145	ARPC3	12	0	6	-0.129737	0.494195
O15151	MDM4	1	0.000130924	1	0.17978	0.477556
O15155	BET1	5	0	2	0.0434936	0.449009
O15156	ZBTB7B	3	0	3	0.18824	0.553378
O15160	POLR1C	16	0	10	0.0724978	0.639259
O15162	PLSCR1	1	0.000130924	1	-0.0409795	0.866889
O15164	TRIM24	10	0	8	-0.0875156	0.802361
O15169	AXIN1	3	0	3	-0.0175313	0.784455
O15173	PGRMC2	20	0	8	0.0877109	0.634254
O15182	CETN3	3	0	2	-0.243671	0.0689307
O15194	CTDSPL	2	0	1	0.145155	0.367437
O15211	RGL2	2	0	2	0.571929	0.0198025
O15212	PFDN6	11	0	7	-0.24662	0.151818
O15213	WDR46	20	0	15	0.0306144	0.88028
O15226	NKRF	28	0	18	-0.113151	0.802941
O15228	GNPAT	9	0	7	0.00642578	0.876184
O15230	LAMA5	3	0	3	0.00787662	0.986607
O15231	ZNF185	19	0	14	0.0340297	0.654188
O15234	CASC3	6	0	6	0.0962577	0.93636
O15235	MRPS12	6	0	3	-0.199716	0.0495558
O15240	VGF	1	0.000130924	1	0.427754	0.181669
O15243	LEPROT	1	0.000130924	1	0.536624	0.0124753
O15254	ACOX3	3	0	3	-0.193506	0.436312
O15258	RER1	4	0	4	0.147517	0.688721
O15259	NPHP1	2	0	2	0.00500774	0.801347
O15260	SURF4	9	0	5	0.158624	0.100872
O15264	MAPK13	4	0	3	-0.140539	0.295589
O15265	ATXN7	1	0.000130924	1	-0.0533553	0.261231
O15269	SPTLC1	16	0	8	0.124063	0.184677
O15270	SPTLC2	15	0	12	0.241467	0.141826
O15287	FANCG	13	0	12	-0.0754806	0.730192
O15294	OGT	27	0	18	-0.0820077	0.781266
O15297	PPM1D	5	0	4	-0.132407	0.276154
O15304	SIVA1	3	0	3	0.302173	0.73374
O15305	PMM2	19	0	10	-0.0922069	0.673258
O15318	POLR3G	2	0	2	-0.0213915	0.959851
O15321	TM9SF1	6	0	4	0.0450148	0.649361
O15327	INPP4B	5	0	5	-0.0381827	0.347114
O15344	MID1	14	0	10	0.0842447	0.89241
O15347	HMGB3	11	0	6	0.0607972	0.923997
O15355	PPM1G	29	0	20	0.0359958	0.83107
O15357	INPPL1	6	0	6	-0.133462	0.338906
O15360	FANCA	10	0	8	0.0254465	0.926996
O15370	SOX12	1	0.000130924	1	-0.763616	0.158166
O15371	EIF3D	41	0	20	-0.156286	0.457285
O15372	EIF3H	30	0	17	-0.184134	0.631744
O15379	HDAC3	2	0	1	-0.104934	0.265219
O15381	NVL	14	0	14	0.0412363	0.384964
O15382	BCAT2	13	0	10	-0.00855405	0.790414
O15392	BIRC5	5	0	5	-0.29276	0.481677
O15397	IPO8	5	0	5	0.0103675	0.858656
O15400	STX7	8	0	6	-0.0418878	0.974318
O15403	SLC16A6	1	0.000130924	1	-0.0623658	0.485579
O15417	TNRC18	1	0.000130924	1	0.26165	0.235883
O15427	SLC16A3	12	0	8	0.0997706	0.413914
O15431	SLC31A1	1	0.000130924	1	0.329019	0.113663
O15439	ABCC4	7	0	7	-0.0361523	0.898786
O15446	POLR1G	12	0	8	0.0821811	0.339093
O15460	P4HA2	12	0	10	-0.127797	0.383988
O15479	MAGEB2	22	0	11	-0.0416103	0.881593
O15484	CAPN5	1	0.000130924	1	0.18099	0.198779
O15498	YKT6	20	0	10	-0.234761	0.363506
O15504	NUP42	5	0	5	-0.0277914	0.822319
O15511	ARPC5	11	0	6	0.117683	0.694933
O15514	POLR2D	10	0	7	0.241083	0.804316
O15516	CLOCK	4	0	4	0.0424732	0.852693
O15525	MAFG	6	0	3	-0.0612528	0.581415
O15528	CYP27B1	1	0.000130924	1	-0.0909597	0.77123
O15530	PDPK1	8	0	7	-0.0802292	0.975144
O15533	TAPBP	5	0	3	0.194414	0.435859
O15534	PER1	3	0	3	0.113591	0.981352
O15541	RNF113A	1	0.000130924	1	-0.0293802	0.605702
O15550	KDM6A	4	0	2	-0.0384222	0.670363
O15551	CLDN3	2	0	2	0.110741	0.194154
O43143	DHX15	56	0	28	-0.0955299	0.943735
O43148	RNMT	17	0	14	-0.0102392	0.95316
O43149	ZZEF1	4	0	4	-0.178631	0.440783
O43156	TTI1	12	0	11	0.0311948	0.539396
O43159	RRP8	3	0	3	0.0196376	0.713839
O43164	PJA2	4	0	4	-0.150614	0.214922
O43166	SIPA1L1	3	0	3	0.182676	0.239726
O43167	ZBTB24	2	0	2	-0.0688072	0.470483
O43169	CYB5B	42	0	7	0.215709	0.218058
O43172	PRPF4	40	0	25	-0.041711	0.594913
O43175	PHGDH	55	0	21	0.0280508	0.530172
O43181	NDUFS4	4	0	3	-0.20852	0.0551384
O43189	PHF1	3	0	3	0.258398	0.116429
O43237	DYNC1LI2	13	0	10	-0.256806	0.223761
O43242	PSMD3	44	0	26	-0.0361774	0.849196
O43251	RBFOX2	9	0	7	0.0795524	0.327435
O43252	PAPSS1	27	0	20	-0.0626314	0.42364
O43255	SIAH2	1	0.000130924	1	0	0.665033
O43264	ZW10	22	0	13	-0.0443166	0.313115
O43278	SPINT1	15	0	12	0.0206204	0.933798
O43286	B4GALT5	1	0.000130924	1	0.140165	0.752018
O43290	SART1	49	0	30	0.0976181	0.649226
O43291	SPINT2	9	0	6	0.654524	0.00121072
O43292	GPAA1	6	0	3	-0.00941245	0.984227
O43293	DAPK3	4	0	3	-0.00102104	0.895132
O43294	TGFB1I1	2	0	2	0.411197	0.585992
O43298	ZBTB43	2	0	2	-0.0993216	0.451747
O43299	AP5Z1	2	0	2	-0.274272	0.350424
O43301	HSPA12A	9	0	8	-0.0499479	0.871903
O43303	CCP110	4	0	4	0.0351099	0.598664
O43310	CTIF	5	0	4	0.115649	0.973974
O43314	PPIP5K2	10	0	7	-0.0140626	0.93121
O43318	MAP3K7	5	0	5	-0.0502427	0.846072
O43324	EEF1E1	7	0	6	-0.0316999	0.650567
O43347	MSI1	4	0	4	-0.161231	0.371904
O43353	RIPK2	3	0	3	-0.127239	0.563014
O43379	WDR62	6	0	6	0.0732827	0.803148
O43390	HNRNPR	92	0	27	-0.0283979	0.825808
O43395	PRPF3	42	0	23	0.0908412	0.603171
O43396	TXNL1	30	0	14	-0.00948023	0.97294
O43399	TPD52L2	15	0	8	-0.09809	0.524228
O43402	EMC8	7	0	6	-0.143485	0.414067
O43414	ERI3	4	0	3	0.0496171	0.9371
O43422	THAP12	7	0	7	0.0645287	0.473704
O43426	SYNJ1	1	0.000130924	1	-0.535217	0.124044
O43427	FIBP	6	0	5	-0.196968	0.548838
O43432	EIF4G3	27	0	15	-0.101141	0.466983
O43447	PPIH	19	0	7	-0.00816747	0.608179
O43462	MBTPS2	1	0.000130924	1	0.330648	0.320178
O43463	SUV39H1	4	0	3	0.0218138	0.497585
O43464	HTRA2	5	0	4	-0.102994	0.500495
O43482	OIP5	2	0	1	0.251004	0.287048
O43488	AKR7A2	19	0	10	-0.0523968	0.818626
O43490	PROM1	3	0	2	0.264719	0.0987989
O43491	EPB41L2	52	0	36	-0.00808985	0.935923
O43493	TGOLN2	8	0	6	-0.0196239	0.632491
O43502	RAD51C	2	0	2	-0.0364056	0.737349
O43504	LAMTOR5	4	0	3	-0.0675421	0.320529
O43513	MED7	3	0	2	-0.0106159	0.624435
O43520	ATP8B1	1	0.000130924	1	-0.0501477	0.572353
O43542	XRCC3	10	0	7	0.0102997	0.903472
O43572	AKAP10	1	0.000130924	1	-0.00155979	0.637853
O43581	SYT7	2	0	2	-0.191804	0.252916
O43583	DENR	5	0	4	-0.103561	0.788966
O43592	XPOT	9	0	5	-0.144837	0.525842
O43598	DNPH1	10	0	6	0.144164	0.61842
O43615	TIMM44	28	0	22	-0.0249978	0.462862
O43617	TRAPPC3	12	0	5	0.109125	0.368249
O43633	CHMP2A	16	0	10	-0.072173	0.854442
O43657	TSPAN6	1	0.000130924	1	-0.0709403	0.752627
O43660	PLRG1	22	0	16	-0.0422272	0.961494
O43663	PRC1	15	0	15	-0.0589001	0.380424
O43665	RGS10	20	0	8	-0.0645554	0.916621
O43670	ZNF207	14	0	6	0.043944	0.534959
O43674	NDUFB5	3	0	2	-0.510611	0.0404306
O43676	NDUFB3	2	0	1	-0.352245	0.078328
O43678	NDUFA2	6	0	3	-0.0108469	0.634786
O43679	LDB2	1	0.000130924	1	-0.152462	0.111474
O43681	GET3	16	0	9	0.0762811	0.446497
O43683	BUB1	11	0	9	-0.395211	0.0214072
O43684	BUB3	10	0	7	-0.127688	0.566398
O43688	PLPP2	3	0	2	0.263118	0.205639
O43707	ACTN4	128	0	31	-0.0626654	0.892102
O43708	GSTZ1	3	0	3	-0.212416	0.704493
O43709	BUD23	8	0	7	0.00607232	0.726501
O43715	TRIAP1	3	0	2	-0.053882	0.39126
O43716	GATC	5	0	3	0.261611	0.773282
O43719	HTATSF1	37	0	21	-0.0633312	0.909108
O43731	KDELR3	3	0	2	0.0653246	0.903132
O43739	CYTH3	1	0.000130924	1	-0.192377	0.0935383
O43747	AP1G1	28	0	17	-0.0561521	0.901886
O43752	STX6	7	0	6	0.385762	0.128038
O43759	SYNGR1	1	0.000130924	1	0.000114521	0.726067
O43760	SYNGR2	4	0	3	-0.080044	0.87305
O43765	SGTA	27	0	10	0.132099	0.589849
O43766	LIAS	4	0	4	0.0980822	0.93249
O43768	ENSA	11	0	6	0.0201925	0.681576
O43772	SLC25A20	4	0	3	-0.184985	0.424884
O43776	NARS1	40	0	19	0.06215	0.906328
O43795	MYO1B	42	0	25	-0.0461985	0.89919
O43805	SSNA1	6	0	5	-0.0604565	0.219703
O43809	NUDT21	21	0	11	-0.0925355	0.69906
O43813	LANCL1	13	0	8	0.107092	0.707295
O43815	STRN	20	0	16	0.0355812	0.844045
O43818	RRP9	15	0	11	0.192671	0.084623
O43819	SCO2	7	0	5	-0.197915	0.126821
O43823	AKAP8	12	0	10	0.174274	0.366409
O43824	GTPBP6	3	0	3	0.0936497	0.518999
O43826	SLC37A4	1	0.000130924	1	0.413834	0.0142626
O43837	IDH3B	20	0	11	0.0761083	0.955555
O43847	NRDC	35	0	21	-0.095166	0.387748
O43852	CALU	23	0	12	-0.0383799	0.780686
O43865	AHCYL1	14	0	11	-0.0466201	0.891629
O43869	OR2T1	3	0	1	-0.363141	0.29463
O43896	KIF1C	17	0	14	-0.156563	0.226443
O43900	PRICKLE3	1	0.000130924	1	-0.228836	0.324815
O43909	EXTL3	5	0	5	0.0798115	0.383114
O43913	ORC5	5	0	4	-0.177443	0.582276
O43920	NDUFS5	3	0	2	-0.017954	0.699407
O43924	PDE6D	2	0	2	-0.0591724	0.531085
O43929	ORC4	11	0	7	-0.13952	0.421554
O43933	PEX1	7	0	6	-0.167911	0.223806
O60216	RAD21	20	0	14	0.00412751	0.780396
O60220	TIMM8A	5	0	4	0.106574	0.592327
O60231	DHX16	28	0	20	-0.0271015	0.889641
O60232	ZNRD2	10	0	4	-0.0404013	0.912466
O60237	PPP1R12B	1	0.000130924	1	-0.175892	0.451214
O60239	SH3BP5	1	0.000130924	1	-0.426152	0.00294349
O60243	HS6ST1	1	0.000130924	1	0.0355981	0.364157
O60244	MED14	13	0	12	-0.00802439	0.724216
O60256	PRPSAP2	17	0	11	0.0386485	0.818128
O60262	GNG7	2	0	1	0.343742	0.344246
O60264	SMARCA5	75	0	37	-0.0695373	0.549495
O60266	ADCY3	1	0.000130924	1	-0.0549806	0.96111
O60271	SPAG9	28	0	21	0.0347663	0.617931
O60281	ZNF292	3	0	3	-0.00580547	0.571856
O60287	URB1	27	0	23	-0.047057	0.697697
O60291	MGRN1	5	0	4	0.0341049	0.713405
O60292	SIPA1L3	7	0	7	-0.0193902	0.434635
O60293	ZFC3H1	9	0	8	0.0766213	0.822852
O60294	LCMT2	1	0.000130924	1	0.30529	0.649036
O60306	AQR	21	0	18	-0.00704135	0.809458
O60307	MAST3	2	0	1	-0.0989312	0.33767
O60313	OPA1	33	0	25	-0.123204	0.280493
O60318	MCM3AP	11	0	10	0.114413	0.442549
O60333	KIF1B	18	0	17	-0.227253	0.109412
O60336	MAPKBP1	2	0	2	-0.0805292	0.123547
O60337	MARCHF6	1	0.000130924	1	-0.0976681	0.908669
O60341	KDM1A	28	0	20	-0.0713574	0.366368
O60343	TBC1D4	24	0	17	0.00368413	0.920465
O60346	PHLPP1	1	0.000130924	1	-0.191978	0.799868
O60347	TBC1D12	2	0	2	-0.0812443	0.5471
O60353	FZD6	5	0	4	0.214979	0.53433
O60422	ONECUT3	2	0	2	-0.168635	0.252301
O60427	FADS1	2	0	2	-0.256712	0.326286
O60437	PPL	43	0	36	0.179801	0.536735
O60443	GSDME	1	0.000130924	1	-0.318063	0.895704
O60447	EVI5	3	0	3	-0.0898129	0.343322
O60476	MAN1A2	3	0	3	-0.0817752	0.775718
O60487	MPZL2	1	0.000130924	1	0.301825	0.255504
O60488	ACSL4	20	0	17	-0.0933019	0.622255
O60493	SNX3	8	0	6	-0.0264174	0.813201
O60499	STX10	6	0	5	0.0536131	0.578683
O60502	OGA	31	0	22	-0.122006	0.699933
O60503	ADCY9	2	0	2	0.284565	0.0326785
O60504	SORBS3	5	0	5	0.0263689	0.363389
O60506	SYNCRIP	81	0	23	-0.0852939	0.554213
O60508	CDC40	20	0	17	-0.00522842	0.859453
O60512	B4GALT3	2	0	2	-0.0754649	0.293249
O60518	RANBP6	11	0	8	-0.139111	0.614787
O60524	NEMF	18	0	16	-0.188743	0.313911
O60551	NMT2	4	0	4	-0.0249725	0.873463
O60563	CCNT1	22	0	13	0.00449081	0.582422
O60566	BUB1B	24	0	17	-0.0397615	0.349456
O60568	PLOD3	13	0	11	0.0963649	0.741695
O60573	EIF4E2	6	0	5	0.0261497	0.507821
O60583	CCNT2	3	0	2	-0.0426236	0.900407
O60610	DIAPH1	71	0	36	0.0451623	0.924406
O60613	SELENOF	4	0	3	0.110558	0.190054
O60637	TSPAN3	2	0	2	0.544647	0.00515358
O60645	EXOC3	10	0	9	-0.162573	0.307092
O60658	PDE8A	1	0.000130924	1	-0.212623	0.629053
O60664	PLIN3	49	0	20	0.0912368	0.643354
O60671	RAD1	3	0	3	0.170828	0.156219
O60675	MAFK	3	0	3	-0.242712	0.815308
O60678	PRMT3	13	0	9	-0.0451062	0.573454
O60684	KPNA6	17	0	10	0.0207924	0.762063
O60701	UGDH	29	0	19	-0.0684557	0.729185
O60704	TPST2	1	0.000130924	1	0.104206	0.663504
O60716	CTNND1	48	0	29	0.25978	0.54825
O60749	SNX2	27	0	19	-0.0679861	0.515519
O60762	DPM1	9	0	7	0.121859	0.475128
O60763	USO1	37	0	21	0.0107794	0.944685
O60779	SLC19A2	1	0.000130924	1	0.189547	0.493354
O60783	MRPS14	4	0	3	-0.135485	0.15044
O60784	TOM1	6	0	5	0.14704	0.457663
O60814	H2BC12	13	0	3	-0.110297	0.746832
O60825	PFKFB2	9	0	8	0.0360245	0.304039
O60826	CCDC22	18	0	15	-0.0485652	0.52297
O60828	PQBP1	8	0	7	0.0476821	0.65934
O60831	PRAF2	6	0	3	0.0735714	0.451635
O60832	DKC1	32	0	17	-0.0555647	0.867733
O60841	EIF5B	59	0	36	-0.143761	0.353744
O60858	TRIM13	1	0.000130924	1	0.143389	0.791203
O60869	EDF1	9	0	4	-0.21392	0.336928
O60870	KIN	15	0	12	-0.00886062	0.775184
O60879	DIAPH2	3	0	3	-0.0710829	0.469419
O60884	DNAJA2	30	0	15	-0.0767345	0.185709
O60885	BRD4	17	0	9	-0.0290967	0.737989
O60888	CUTA	9	0	6	-0.109193	0.955913
O60906	SMPD2	1	0.000130924	1	0.0671187	0.441229
O60921	HUS1	6	0	4	0.00544279	0.950667
O60925	PFDN1	19	0	9	0.0056362	0.871206
O60927	PPP1R11	5	0	3	0.209989	0.660257
O60930	RNASEH1	4	0	3	-0.063142	0.214307
O60934	NBN	1	0.000130924	1	-0.383751	0.0313381
O60936	NOL3	8	0	5	0.139088	0.818455
O60941	DTNB	3	0	3	-0.0171394	0.596927
O60942	RNGTT	13	0	10	-0.157178	0.851564
O75027	ABCB7	7	0	6	-0.00900303	0.436735
O75044	SRGAP2	17	0	15	-0.065631	0.635041
O75052	NOS1AP	3	0	3	0.0317392	0.862572
O75054	IGSF3	5	0	5	-0.0283612	0.947237
O75061	DNAJC6	1	0.000130924	1	-0.0282426	0.396037
O75063	FAM20B	3	0	2	0.0324494	0.836317
O75071	EFCAB14	1	0.000130924	1	0.152319	0.748997
O75083	WDR1	48	0	25	-0.135437	0.849599
O75084	FZD7	3	0	3	0.0386952	0.730765
O75093	SLIT1	2	0	1	-0.0963447	0.434879
O75113	N4BP1	3	0	3	-0.284513	0.0781251
O75116	ROCK2	45	0	36	-0.158589	0.350545
O75122	CLASP2	5	0	4	-0.0345897	0.849636
O75127	PTCD1	8	0	7	-0.128324	0.625153
O75131	CPNE3	41	0	15	-0.175332	0.387559
O75140	DEPDC5	2	0	2	0.0967031	0.529641
O75143	ATG13	3	0	3	-0.186123	0.0850923
O75145	PPFIA3	4	0	4	0.110743	0.661848
O75146	HIP1R	20	0	17	0.185664	0.18162
O75150	RNF40	41	0	29	-0.0291033	0.848739
O75151	PHF2	3	0	3	0.0487915	0.388102
O75152	ZC3H11A	25	0	18	0.0774631	0.508784
O75153	CLUH	58	0	36	-0.102424	0.466821
O75157	TSC22D2	8	0	5	0.0821927	0.626232
O75161	NPHP4	1	0.000130924	1	-0.255991	0.870793
O75164	KDM4A	9	0	9	-0.0870286	0.690804
O75165	DNAJC13	20	0	18	-0.0219964	0.748354
O75167	PHACTR2	1	0.000130924	1	-0.0922924	0.437062
O75170	PPP6R2	9	0	8	0.0298262	0.912969
O75175	CNOT3	12	0	11	-0.165952	0.484776
O75179	ANKRD17	15	0	14	-0.16974	0.227365
O75182	SIN3B	6	0	6	-0.0187195	0.448617
O75190	DNAJB6	9	0	7	0.0197348	0.752779
O75208	COQ9	9	0	5	0.00901515	0.616099
O75223	GGCT	9	0	7	-0.0879835	0.769552
O75251	NDUFS7	6	0	3	-0.377623	0.300953
O75298	RTN2	1	0.000130924	1	-0.00211294	0.717821
O75306	NDUFS2	17	0	12	-0.0294422	0.731552
O75312	ZPR1	23	0	16	0.0488966	0.868265
O75319	DUSP11	4	0	4	-0.083584	0.20876
O75323	NIPSNAP2	7	0	5	0.0888991	0.903379
O75326	SEMA7A	1	0.000130924	1	-0.255647	0.29017
O75330	HMMR	17	0	16	-0.121328	0.50459
O75340	PDCD6	8	0	6	0.0734062	0.864247
O75347	TBCA	19	0	10	-0.211893	0.226873
O75348	ATP6V1G1	5	0	5	-0.0205573	0.822185
O75351	VPS4B	29	0	17	-0.124978	0.673738
O75354	ENTPD6	3	0	3	-0.0125002	0.950513
O75356	ENTPD5	1	0.000130924	1	-0.0214424	0.277821
O75362	ZNF217	2	0	2	-0.19792	0.142658
O75364	PITX3	1	0.000130924	1	-0.225349	0.0486694
O75367	MACROH2A1	26	0	18	0.0622568	0.878788
O75368	SH3BGRL	15	0	8	0.0363986	0.49553
O75369	FLNB	183	0	103	0.0421384	0.941924
O75376	NCOR1	3	0	2	0.0764988	0.700752
O75380	NDUFS6	7	0	5	-0.0995238	0.689064
O75381	PEX14	15	0	8	0.0557802	0.455422
O75382	TRIM3	4	0	4	-0.319958	0.103637
O75386	TULP3	1	0.000130924	1	-0.389819	0.21233
O75390	CS	32	0	13	-0.176443	0.59582
O75391	SPAG7	6	0	6	-0.0907636	0.379907
O75394	MRPL33	4	0	2	-0.154037	0.567235
O75396	SEC22B	19	0	9	-0.0805311	0.747108
O75400	PRPF40A	43	0	23	0.144027	0.608995
O75410	TACC1	27	0	16	0.10237	0.448174
O75414	NME6	3	0	3	0.159819	0.570712
O75419	CDC45	3	0	2	0.0178412	0.553416
O75420	GIGYF1	1	0.000130924	1	-0.307713	0.599008
O75427	LRCH4	2	0	2	-0.133756	0.819419
O75431	MTX2	11	0	5	-0.0603396	0.622221
O75436	VPS26A	15	0	10	-0.0248032	0.819761
O75438	NDUFB1	1	0.000130924	1	-0.246746	0.0974417
O75439	PMPCB	34	0	17	-0.0991796	0.558855
O75446	SAP30	6	0	4	0.0809341	0.339412
O75448	MED24	10	0	9	0.0194734	0.567781
O75449	KATNA1	3	0	3	-0.0577077	0.564546
O75460	ERN1	1	0.000130924	1	0.0282752	0.733748
O75461	E2F6	4	0	3	0.0350918	0.606677
O75467	ZNF324	1	0.000130924	1	-0.081438	0.937953
O75475	PSIP1	27	0	18	0.00294396	0.734555
O75477	ERLIN1	23	0	15	-0.0592672	0.661209
O75486	SUPT3H	1	0.000130924	1	0.157852	0.161726
O75487	GPC4	1	0.000130924	1	-0.000122899	0.809865
O75489	NDUFS3	15	0	9	-0.0750055	0.435477
O75494	SRSF10	19	0	11	0.241165	0.298887
O75496	GMNN	5	0	5	-0.0972056	0.52949
O75503	CLN5	8	0	5	-0.172335	0.273823
O75506	HSBP1	5	0	2	-0.318363	0.0947911
O75521	ECI2	15	0	9	0.10558	0.409077
O75525	KHDRBS3	4	0	3	0.112263	0.849964
O75528	TADA3	8	0	8	-0.0612718	0.649518
O75529	TAF5L	6	0	6	-0.0870745	0.595574
O75530	EED	11	0	7	0.0755298	0.361013
O75531	BANF1	15	0	5	-0.0273637	0.763139
O75533	SF3B1	85	0	42	-0.0314524	0.97172
O75534	CSDE1	62	0	37	-0.200197	0.0784334
O75554	WBP4	4	0	4	-0.0950242	0.492097
O75564	JRK	2	0	2	-0.3016	0.263191
O75569	PRKRA	14	0	8	0.0165477	0.863534
O75570	MTRF1	2	0	2	-0.0844424	0.542211
O75575	CRCP	4	0	3	0.165344	0.610823
O75581	LRP6	2	0	2	0.0744624	0.712709
O75582	RPS6KA5	8	0	6	-0.0565375	0.75952
O75586	MED6	3	0	2	-0.0915235	0.528659
O75592	MYCBP2	18	0	18	-0.070026	0.931892
O75600	GCAT	2	0	1	0.083685	0.609039
O75607	NPM3	19	0	7	0.179222	0.794015
O75608	LYPLA1	11	0	5	-0.200132	0.324128
O75616	ERAL1	6	0	3	-0.263124	0.641895
O75629	CREG1	1	0.000130924	1	0	0.890988
O75643	SNRNP200	146	0	78	0.0216284	0.948631
O75648	TRMU	5	0	5	-0.184556	0.338596
O75663	TIPRL	10	0	8	-0.12944	0.543428
O75665	OFD1	5	0	5	0.146778	0.395132
O75674	TOM1L1	6	0	5	-0.0131334	0.423193
O75676	RPS6KA4	13	0	11	0.00492825	0.947668
O75683	SURF6	12	0	8	0.178724	0.0751718
O75688	PPM1B	12	0	11	0.216024	0.590176
O75689	ADAP1	3	0	2	0.0907676	0.924053
O75691	UTP20	50	0	45	-0.000325733	0.856507
O75694	NUP155	49	0	30	0.0534207	0.909031
O75695	RP2	6	0	4	0.0915739	0.216546
O75716	STK16	2	0	2	0.201886	0.689417
O75717	WDHD1	32	0	26	-0.104409	0.672407
O75718	CRTAP	11	0	7	0.00627566	0.936171
O75746	SLC25A12	14	0	11	0.0149962	0.849349
O75781	PALM	5	0	4	0.0907012	0.712258
O75787	ATP6AP2	7	0	5	0.0663934	0.45297
O75792	RNASEH2A	11	0	7	-0.0445931	0.533969
O75794	CDC123	20	0	13	-0.136403	0.510024
O75808	CAPN15	2	0	2	0.135569	0.724309
O75815	BCAR3	5	0	4	-0.231027	0.0426081
O75817	POP7	5	0	3	-0.00593822	0.677912
O75818	RPP40	8	0	6	-0.166155	0.875522
O75820	ZNF189	2	0	2	0.274817	0.464828
O75821	EIF3G	21	0	11	0.025911	0.847239
O75822	EIF3J	16	0	11	-0.0690159	0.588799
O75828	CBR3	1	0.000130924	1	0.0982304	0.972121
O75832	PSMD10	13	0	8	0.052449	0.884996
O75843	AP1G2	4	0	4	-0.0654779	0.279163
O75844	ZMPSTE24	14	0	9	-0.00613839	0.950652
O75864	PPP1R37	1	0.000130924	1	0.00545706	0.552254
O75865	TRAPPC6A	2	0	2	-0.00520202	0.913778
O75874	IDH1	44	0	19	-0.0334952	0.652533
O75879	GATB	17	0	14	-0.0301919	0.760242
O75880	SCO1	5	0	3	-0.0210981	0.943908
O75882	ATRN	4	0	4	0.0788138	0.205256
O75884	RBBP9	3	0	2	0.0474962	0.558641
O75886	STAM2	4	0	4	-0.0731057	0.929914
O75907	DGAT1	3	0	2	0.119477	0.377261
O75909	CCNK	6	0	5	0.0230966	0.912394
O75915	ARL6IP5	7	0	2	-0.11772	0.677365
O75925	PIAS1	5	0	3	-0.0622999	0.404769
O75928	PIAS2	2	0	1	-0.167725	0.903058
O75934	BCAS2	17	0	8	-0.0441142	0.811124
O75935	DCTN3	7	0	6	0.044988	0.728689
O75937	DNAJC8	18	0	12	0.00867982	0.724128
O75940	SMNDC1	14	0	8	0.00764427	0.804927
O75943	RAD17	3	0	3	-0.188029	0.0734353
O75947	ATP5PD	26	0	13	0.0410411	0.584684
O75953	DNAJB5	1	0.000130924	1	0.164595	0.799401
O75955	FLOT1	10	0	8	0.0197115	0.916591
O75962	TRIO	8	0	7	-0.25674	0.0554418
O75964	ATP5MG	6	0	3	-0.0500049	0.99516
O75971	SNAPC5	1	0.000130924	1	-0.487028	0.00737329
O75976	CPD	28	0	19	0.152664	0.292974
O76003	GLRX3	24	0	13	0.00698154	0.845507
O76021	RSL1D1	42	0	25	-0.123636	0.740878
O76024	WFS1	11	0	8	0.0516423	0.665557
O76031	CLPX	21	0	18	-0.0870827	0.252603
O76054	SEC14L2	8	0	6	0.0303872	0.976679
O76061	STC2	3	0	3	2.10969	0.000230738
O76070	SNCG	8	0	6	0.0168349	0.789441
O76071	CIAO1	12	0	8	0.0488521	0.533916
O76074	PDE5A	2	0	2	0.00595206	0.704729
O76075	DFFB	6	0	4	0.102461	0.650819
O76080	ZFAND5	1	0.000130924	1	0.0255502	0.637096
O76083	PDE9A	2	0	2	-0.277117	0.0451091
O76094	SRP72	30	0	18	-0.144662	0.797977
O94760	DDAH1	11	0	5	-0.0540373	0.588732
O94761	RECQL4	9	0	8	-0.0908553	0.325935
O94762	RECQL5	9	0	7	-0.204844	0.48571
O94763	URI1	8	0	8	0.0522467	0.981341
O94766	B3GAT3	3	0	3	-0.110362	0.768333
O94776	MTA2	26	0	16	0.0353337	0.685713
O94782	USP1	3	0	3	-0.197072	0.0308944
O94804	STK10	18	0	14	-0.0508211	0.684409
O94808	GFPT2	5	0	5	-0.123668	0.186718
O94811	TPPP	1	0.000130924	1	-0.0254666	0.52573
O94817	ATG12	4	0	3	0.0557221	0.967504
O94819	KBTBD11	1	0.000130924	1	-0.16447	0.617156
O94826	TOMM70	60	0	23	0.0986733	0.280183
O94829	IPO13	3	0	3	0.0346052	0.437401
O94830	DDHD2	3	0	3	0.085794	0.689182
O94832	MYO1D	16	0	15	0.0882895	0.829735
O94842	TOX4	7	0	6	-0.0309752	0.99391
O94850	DDN	1	0.000130924	1	-1.16602	0.0428797
O94851	MICAL2	2	0	2	0.196604	0.458156
O94855	SEC24D	17	0	13	0.0353075	0.940603
O94864	SUPT7L	2	0	2	0.0168913	0.815354
O94874	UFL1	35	0	23	-0.00555776	0.836814
O94885	SASH1	1	0.000130924	1	0.0402954	0.286903
O94886	TMEM63A	1	0.000130924	1	0.301925	0.625853
O94887	FARP2	2	0	2	-0.0573881	0.454686
O94888	UBXN7	13	0	11	0.242218	0.521367
O94889	KLHL18	4	0	4	-0.134911	0.398444
O94898	LRIG2	2	0	2	0.26332	0.10416
O94901	SUN1	31	0	17	0.0307467	0.750793
O94903	PLPBP	13	0	8	-0.0658897	0.601397
O94905	ERLIN2	11	0	9	0.0424134	0.862274
O94906	PRPF6	62	0	42	-0.0730289	0.958987
O94907	DKK1	7	0	6	0.58724	0.105726
O94913	PCF11	13	0	11	0.106709	0.354585
O94915	FRYL	17	0	15	-0.103848	0.335537
O94916	NFAT5	8	0	6	-0.0537896	0.446378
O94919	ENDOD1	10	0	9	-0.0135098	0.960086
O94923	GLCE	3	0	3	-0.101391	0.219605
O94925	GLS	19	0	12	-0.0889311	0.505171
O94927	HAUS5	13	0	10	-0.0371306	0.782022
O94952	FBXO21	8	0	7	-0.169031	0.628727
O94953	KDM4B	3	0	3	-0.363359	0.243867
O94964	SOGA1	4	0	4	-0.0868917	0.244275
O94966	USP19	21	0	14	0.0868014	0.608383
O94967	WDR47	2	0	2	0.251879	0.749748
O94972	TRIM37	1	0.000130924	1	-0.47081	0.0310624
O94973	AP2A2	16	0	13	0.0393441	0.930778
O94979	SEC31A	30	0	24	-0.101478	0.653377
O94983	CAMTA2	1	0.000130924	1	0	1
O94985	CLSTN1	2	0	2	0.644014	0.000173566
O94988	FAM13A	1	0.000130924	1	-0.156844	0.903461
O94992	HEXIM1	26	0	10	0.0480556	0.855343
O95049	TJP3	8	0	8	0.225964	0.529867
O95057	DIRAS1	2	0	2	-0.311981	0.0302088
O95059	RPP14	3	0	3	0.0353555	0.482142
O95067	CCNB2	7	0	5	-0.269659	0.0773285
O95071	UBR5	51	0	45	-0.0390623	0.661138
O95081	AGFG2	3	0	3	0.2287	0.349357
O95104	SCAF4	6	0	6	-0.130292	0.591713
O95139	NDUFB6	7	0	4	-0.296847	0.0219163
O95140	MFN2	13	0	10	-0.358712	0.0360193
O95149	SNUPN	4	0	4	-0.244863	0.182085
O95155	UBE4B	22	0	18	-0.110057	0.23957
O95158	NXPH4	1	0.000130924	1	-0.192181	0.199803
O95159	ZFPL1	7	0	4	0.259413	0.0620994
O95163	ELP1	28	0	21	-0.159267	0.452856
O95164	UBL3	2	0	1	0.162669	0.130835
O95166	GABARAP	1	0.000130924	1	-0.226986	0.545616
O95167	NDUFA3	4	0	3	-0.372567	0.0894638
O95168	NDUFB4	3	0	2	-0.0290613	0.869325
O95169	NDUFB8	7	0	4	-0.0296778	0.403891
O95178	NDUFB2	1	0.000130924	1	-0.151039	0.592234
O95182	NDUFA7	5	0	3	-0.227477	0.163534
O95197	RTN3	2	0	2	0.156555	0.87331
O95202	LETM1	51	0	30	0.0196571	0.699403
O95208	EPN2	5	0	4	-0.0188797	0.813995
O95210	STBD1	6	0	5	-0.0745385	0.911006
O95214	LEPROTL1	1	0.000130924	1	0.207073	0.471177
O95218	ZRANB2	4	0	4	-0.0358395	0.376101
O95219	SNX4	3	0	3	-0.106757	0.20712
O95229	ZWINT	10	0	6	-0.178005	0.417611
O95232	LUC7L3	28	0	14	0.0910985	0.597854
O95235	KIF20A	14	0	12	-0.264119	0.0199127
O95239	KIF4A	45	0	33	-0.0307836	0.612161
O95243	MBD4	1	0.000130924	1	0.0361649	0.959425
O95248	SBF1	9	0	7	0.0662951	0.803245
O95249	GOSR1	12	0	7	0.0295495	0.938042
O95251	KAT7	18	0	11	-0.0865932	0.65432
O95260	ATE1	7	0	5	-0.0904583	0.492927
O95271	TNKS	5	0	5	-0.0338651	0.142548
O95273	CCNDBP1	3	0	3	-0.14789	0.248056
O95274	LYPD3	1	0.000130924	1	0.284625	0.308633
O95292	VAPB	12	0	10	0.0343012	0.93488
O95294	RASAL1	3	0	2	-0.0852774	0.560673
O95295	SNAPIN	8	0	4	0.130614	0.984602
O95297	MPZL1	5	0	3	0.16901	0.153137
O95298	NDUFC2	4	0	2	-0.190866	0.308503
O95299	NDUFA10	20	0	13	-0.232882	0.363921
O95302	FKBP9	14	0	9	0.18062	0.475214
O95336	PGLS	9	0	9	0.0275571	0.999198
O95340	PAPSS2	15	0	12	-0.113783	0.730106
O95347	SMC2	50	0	37	-0.0893965	0.572559
O95352	ATG7	10	0	8	-0.138005	0.496447
O95359	TACC2	3	0	2	0.154884	0.586793
O95361	TRIM16	3	0	3	-0.0592844	0.74381
O95363	FARS2	8	0	6	-0.0184144	0.592703
O95365	ZBTB7A	6	0	6	0.238104	0.31842
O95372	LYPLA2	10	0	6	0.109843	0.349633
O95373	IPO7	35	0	24	0.038445	0.51701
O95376	ARIH2	11	0	7	-0.0556438	0.859015
O95379	TNFAIP8	5	0	4	0.0435565	0.861866
O95382	MAP3K6	2	0	2	-0.0292547	0.554881
O95391	SLU7	9	0	7	0.0610667	0.486758
O95394	PGM3	18	0	13	0.0604472	0.930149
O95396	MOCS3	5	0	5	0.00851185	0.947238
O95400	CD2BP2	15	0	8	0.137927	0.697477
O95402	MED26	2	0	2	0.266259	0.895829
O95405	ZFYVE9	1	0.000130924	1	-0.164377	0.363638
O95425	SVIL	10	0	10	0.108474	0.347765
O95427	PIGN	1	0.000130924	1	0	0.249379
O95429	BAG4	7	0	5	-0.038703	0.540731
O95433	AHSA1	31	0	18	0.0145226	0.891883
O95453	PARN	20	0	14	-0.0786331	0.865753
O95455	TGDS	1	0.000130924	1	-0.0260852	0.31848
O95456	PSMG1	6	0	6	-0.11706	0.346063
O95466	FMNL1	1	0.000130924	1	-0.200255	0.285737
O95470	SGPL1	12	0	11	-0.032729	0.691182
O95471	CLDN7	2	0	1	0.205179	0.311165
O95478	NSA2	9	0	4	-0.210496	0.426979
O95479	H6PD	8	0	6	0.178112	0.18275
O95486	SEC24A	16	0	11	-0.149117	0.579127
O95487	SEC24B	13	0	8	-0.126989	0.655303
O95502	NPTXR	3	0	3	-0.094074	0.360527
O95503	CBX6	1	0.000130924	1	-0.225553	0.224707
O95544	NADK	3	0	2	-0.100183	0.118338
O95551	TDP2	3	0	3	0.173375	0.424048
O95562	SFT2D2	1	0.000130924	1	0.0171953	0.584034
O95563	MPC2	2	0	1	0.0338044	0.388125
O95568	METTL18	1	0.000130924	1	0.59331	0.958307
O95571	ETHE1	19	0	10	0.329669	0.205036
O95573	ACSL3	29	0	19	-0.0293431	0.964493
O95602	POLR1A	55	0	37	-0.0190407	0.847412
O95613	PCNT	19	0	18	0.169065	0.861046
O95619	YEATS4	5	0	4	-0.0276198	0.348553
O95625	ZBTB11	9	0	9	-0.118801	0.552179
O95628	CNOT4	4	0	4	-0.256902	0.154032
O95630	STAMBP	11	0	9	-0.0282504	0.316859
O95639	CPSF4	4	0	4	-0.109594	0.312404
O95644	NFATC1	1	0.000130924	1	-0.336275	0.0779552
O95671	ASMTL	11	0	8	-0.0708045	0.81171
O95674	CDS2	3	0	2	-0.167483	0.982162
O95684	CEP43	3	0	2	-0.0758947	0.238512
O95696	BRD1	6	0	6	-0.0977819	0.999457
O95707	POP4	5	0	4	-0.00741041	0.550093
O95714	HERC2	39	0	36	-0.0913448	0.540486
O95716	RAB3D	5	0	2	-0.205357	0.538239
O95721	SNAP29	10	0	8	-0.084393	0.572382
O95747	OXSR1	9	0	8	0.113209	0.100426
O95749	GGPS1	1	0.000130924	1	0.0132663	0.656873
O95755	RAB36	2	0	2	-0.861301	0.533084
O95757	HSPA4L	41	0	29	-0.134251	0.532325
O95758	PTBP3	6	0	4	0.0774568	0.715287
O95759	TBC1D8	8	0	6	-0.0573408	0.294402
O95772	STARD3NL	3	0	3	-0.198996	0.0519234
O95777	LSM8	10	0	4	0.482545	0.484526
O95782	AP2A1	54	0	31	-0.0436703	0.742803
O95785	WIZ	7	0	7	-0.0211395	0.963461
O95786	DDX58	1	0.000130924	1	-0.0364997	0.984961
O95793	STAU1	20	0	14	-0.173471	0.0618578
O95801	TTC4	13	0	8	-0.111917	0.570947
O95807	TMEM50A	1	0.000130924	1	0.143806	0.259249
O95816	BAG2	35	0	15	-0.0550221	0.993704
O95817	BAG3	27	0	19	0.0448972	0.868535
O95819	MAP4K4	8	0	7	-0.242353	0.550599
O95822	MLYCD	1	0.000130924	1	0.0369595	0.313236
O95825	CRYZL1	8	0	6	0.0172574	0.918682
O95831	AIFM1	21	0	13	-0.185296	0.678486
O95833	CLIC3	1	0.000130924	1	0.280944	0.355714
O95834	EML2	16	0	11	0.0409407	0.63057
O95835	LATS1	3	0	3	-0.221593	0.262021
O95861	BPNT1	5	0	4	0.0123878	0.94575
O95863	SNAI1	2	0	2	-0.399907	0.00676876
O95865	DDAH2	8	0	7	0.285674	0.570169
O95870	ABHD16A	6	0	5	-0.0245991	0.93058
O95881	TXNDC12	11	0	5	0.172807	0.222646
O95900	TRUB2	6	0	6	-0.152488	0.459872
O95905	ECD	10	0	9	-0.243522	0.0252111
O95926	SYF2	4	0	3	-0.139861	0.490375
O95931	CBX7	1	0.000130924	1	-0.0636411	0.58493
O95983	MBD3	9	0	7	0.0560491	0.737649
O95985	TOP3B	6	0	6	-0.148228	0.392712
O95989	NUDT3	5	0	4	-0.0697306	0.701966
O95997	PTTG1	3	0	2	0.0758151	0.384114
O95999	BCL10	6	0	4	-0.105373	0.687575
O96000	NDUFB10	7	0	5	-0.0615312	0.291884
O96005	CLPTM1	18	0	8	-0.00994765	0.927865
O96008	TOMM40	19	0	8	-0.033879	0.564978
O96011	PEX11B	4	0	4	0.0581249	0.544762
O96013	PAK4	13	0	9	-0.134101	0.475776
O96015	DNAL4	1	0.000130924	1	-0.0709476	0.412952
O96017	CHEK2	6	0	5	-0.157452	0.471785
O96019	ACTL6A	18	0	12	-0.0122341	0.785649
O96020	CCNE2	1	0.000130924	1	-0.197772	0.650644
O96028	NSD2	19	0	17	-0.123885	0.491619
P00167	CYB5A	4	0	4	0.217554	0.343371
P00338	LDHA	164	0	23	-0.0184104	0.926524
P00367	GLUD1	59	0	27	-0.0722217	0.972904
P00374	DHFR	16	0	8	-0.0419265	0.492571
P00387	CYB5R3	21	0	11	0.0748445	0.455278
P00390	GSR	38	0	17	-0.0881912	0.637946
P00395	MT-CO1	2	0	1	-0.224555	0.233577
P00403	MT-CO2	26	0	6	0.00344035	0.697079
P00441	SOD1	38	0	10	0.0909955	0.781494
P00491	PNP	17	0	12	-0.0445748	0.900787
P00492	HPRT1	33	0	9	0.100772	0.523575
P00505	GOT2	50	0	21	-0.092816	0.637175
P00519	ABL1	4	0	4	-0.0433922	0.326844
P00533	EGFR	20	0	20	0.158229	0.0929695
P00558	PGK1	93	0	28	-0.00419344	0.830669
P00568	AK1	19	0	11	0.27672	0.573699
P00747	PLG	1	0.000130924	1	-0.213189	0.652447
P00749	PLAU	2	0	2	0.604395	0.0102655
P00813	ADA	6	0	5	-0.0210562	0.75805
P00846	MT-ATP6	1	0.000130924	1	0.0627127	0.266141
P00918	CA2	13	0	8	-0.0446731	0.568579
P00966	ASS1	4	0	4	-0.0581003	0.999083
P01008	SERPINC1	5	0	3	-0.304763	0.238832
P01023	A2M	1	0.000130924	1	0.52214	0.245286
P01033	TIMP1	4	0	4	0.818119	0.000366105
P01034	CST3	1	0.000130924	1	0.0954839	0.171434
P01100	FOS	1	0.000130924	1	1.8404	0.000677449
P01111	NRAS	12	0	6	-0.00176011	0.446228
P01112	HRAS	2	0	2	0.0117524	0.814675
P01130	LDLR	18	0	13	0.230973	0.286282
P01137	TGFB1	1	0.000130924	1	0.187797	0.382395
P01889	HLA-B	11	0	5	0.218517	0.489771
P02533	KRT14	6	0	6	0.00221449	0.984784
P02545	LMNA	169	0	51	0.106602	0.258068
P02649	APOE	2	0	2	0.882616	0.00663733
P02656	APOC3	1	0.000130924	1	1.2945	0.00080902
P02686	MBP	3	0	3	-0.0628359	0.59539
P02765	AHSG	6	0	3	0.19301	0.217496
P02768	ALB	7	0	3	-0.0893358	0.502571
P02786	TFRC	62	0	30	-0.0389917	0.658629
P02787	TF	2	0	1	0.64458	0.0031106
P02788	LTF	4	0	3	0.782652	0.000362224
P02792	FTL	3	0	2	0.161044	0.319177
P02794	FTH1	5	0	3	0.131745	0.738345
P02795	MT2A	8	0	3	-0.283135	0.171268
P03886	MT-ND1	4	0	2	-0.0354699	0.339118
P03891	MT-ND2	2	0	1	-1.09193	0.611229
P03897	MT-ND3	1	0.000130924	1	-0.171674	0.0854624
P03905	MT-ND4	2	0	1	-0.120696	0.934879
P03928	MT-ATP8	4	0	1	-0.0963371	0.737761
P04004	VTN	1	0.000130924	1	0.422372	0.0735535
P04040	CAT	33	0	20	0.0810398	0.616985
P04049	RAF1	7	0	6	-0.0656838	0.609771
P04062	GBA	13	0	9	0.172519	0.17292
P04066	FUCA1	2	0	2	-0.102984	0.807504
P04075	ALDOA	153	0	31	0.0144511	0.942611
P04080	CSTB	5	0	3	0.11458	0.317258
P04083	ANXA1	71	0	24	0.0282167	0.869427
P04114	APOB	2	0	2	0.621974	0.000847566
P04150	NR3C1	1	0.000130924	1	-0.162495	0.985463
P04156	PRNP	2	0	1	0.423084	0.19629
P04179	SOD2	9	0	6	0.252962	0.345221
P04181	OAT	32	0	17	-0.10716	0.165271
P04183	TK1	18	0	10	-0.175437	0.0441825
P04259	KRT6B	52	0	13	0.0654574	0.87308
P04264	KRT1	42	0	20	-0.944665	0.895637
P04350	TUBB4A	5	0	3	0.00637828	0.538392
P04406	GAPDH	655	0	22	-0.0537593	0.945808
P04424	ASL	15	0	11	-0.07565	0.66218
P04439	HLA-A	15	0	8	0.345012	0.170011
P04626	ERBB2	8	0	6	0.117336	0.37574
P04632	CAPNS1	24	0	7	0.0841796	0.913306
P04637	TP53	1	0.000130924	1	-0.121665	0.229895
P04732	MT1E	8	0	2	-0.31944	0.172868
P04792	HSPB1	42	0	14	-0.148378	0.205027
P04818	TYMS	17	0	9	-0.235024	0.214604
P04843	RPN1	56	0	24	-0.073352	0.971016
P04844	RPN2	26	0	12	-0.0549272	0.831622
P04899	GNAI2	18	0	10	0.0154608	0.612531
P04920	SLC4A2	18	0	11	0.0800191	0.294625
P05023	ATP1A1	65	0	34	0.0793163	0.899409
P05026	ATP1B1	15	0	10	-0.0414707	0.616026
P05067	APP	8	0	7	0.579989	0.00194324
P05091	ALDH2	16	0	10	0.00223953	0.569216
P05109	S100A8	2	0	2	-0.611469	0.858472
P05114	HMGN1	9	0	7	0.0711826	0.830831
P05121	SERPINE1	1	0.000130924	1	0.116197	0.903677
P05141	SLC25A5	120	0	17	-0.156616	0.560189
P05161	ISG15	5	0	3	0.0256785	0.897204
P05165	PCCA	2	0	2	0.00297629	0.778693
P05166	PCCB	6	0	5	0.405437	0.00391609
P05198	EIF2S1	47	0	23	-0.143391	0.669718
P05204	HMGN2	12	0	5	0.0194449	0.696718
P05386	RPLP1	6	0	1	-0.00815255	0.890217
P05387	RPLP2	48	0	7	-0.163825	0.273973
P05388	RPLP0	37	0	12	-0.101015	0.644898
P05412	JUN	2	0	1	1.07339	0.0298065
P05423	POLR3D	1	0.000130924	1	-0.149558	0.441449
P05452	CLEC3B	2	0	2	0.143885	0.611024
P05455	SSB	38	0	23	0.0359752	0.78671
P05496	ATP5MC1	5	0	2	-0.119594	0.785884
P05549	TFAP2A	2	0	1	0.0524525	0.297027
P05556	ITGB1	44	0	21	0.0680464	0.394604
P05783	KRT18	184	0	33	0.167251	0.229887
P05787	KRT8	296	0	38	0.0908886	0.373065
P06132	UROD	18	0	9	-0.0194593	0.758018
P06213	INSR	3	0	3	0.000663133	0.824255
P06280	GLA	8	0	6	-0.0914228	0.583029
P06396	GSN	18	0	14	-0.0889361	0.909803
P06400	RB1	23	0	17	-0.00694246	0.537432
P06454	PTMA	19	0	4	-0.193998	0.532167
P06493	CDK1	33	0	14	-0.178806	0.456504
P06576	ATP5F1B	197	0	27	0.186678	0.407137
P06703	S100A6	136	0	6	0.119549	0.340227
P06730	EIF4E	7	0	5	0.0346777	0.803358
P06733	ENO1	394	0	24	0.00639341	0.851492
P06737	PYGL	66	0	32	-0.0489288	0.626532
P06744	GPI	89	0	26	-0.0751106	0.69323
P06746	POLB	9	0	8	0.0914893	0.808026
P06748	NPM1	220	0	14	0.112714	0.44748
P06753	TPM3	12	0	5	0.12682	0.651615
P06756	ITGAV	22	0	16	-0.0216358	0.94848
P06865	HEXA	7	0	7	0.116918	0.628387
P07093	SERPINE2	2	0	2	0.00809079	0.605394
P07099	EPHX1	12	0	9	-0.055209	0.952627
P07108	DBI	14	0	5	-0.0547269	0.730552
P07195	LDHB	105	0	16	-0.133563	0.653124
P07199	CENPB	6	0	6	0.112088	0.425657
P07203	GPX1	3	0	3	0.057185	0.760704
P07237	P4HB	138	0	34	0.22139	0.221397
P07305	H1-0	9	0	3	0.0707539	0.654541
P07311	ACYP1	8	0	4	-0.0783186	0.35491
P07339	CTSD	21	0	11	-0.0488583	0.684139
P07355	ANXA2	230	0	28	0.111181	0.528405
P07384	CAPN1	46	0	27	-0.0933165	0.504635
P07437	TUBB	42	0	4	0.229285	0.697196
P07602	PSAP	41	0	14	0.153617	0.226679
P07686	HEXB	25	0	14	0.0253153	0.968919
P07711	CTSL	5	0	3	-0.894913	0.000238364
P07737	PFN1	100	0	11	0.0462111	0.720451
P07738	BPGM	2	0	1	-0.0757535	0.829216
P07741	APRT	26	0	10	-0.00548117	0.628807
P07814	EPRS1	96	0	49	-0.129141	0.46232
P07858	CTSB	8	0	5	-0.565325	0.00349791
P07900	HSP90AA1	220	0	34	-0.0743427	0.859624
P07902	GALT	4	0	4	-0.232732	0.024788
P07910	HNRNPC	89	0	22	0.0931349	0.849214
P07919	UQCRH	13	0	5	-0.0456025	0.925643
P07942	LAMB1	5	0	5	0.118485	0.668095
P07947	YES1	11	0	7	0.0989242	0.313132
P07948	LYN	7	0	7	-0.088839	0.604149
P07951	TPM2	13	0	8	-0.256446	0.1807
P07954	FH	47	0	18	-0.0556736	0.860047
P07992	ERCC1	3	0	2	-0.0550878	0.560336
P07996	THBS1	4	0	4	0.298619	0.0553458
P08047	SP1	4	0	3	-0.129126	0.964362
P08048	ZFY	2	0	1	0.106167	0.384829
P08133	ANXA6	64	0	33	0.0872996	0.913016
P08134	RHOC	30	0	9	0.0891643	0.434596
P08138	NGFR	1	0.000130924	1	0.845334	0.0595562
P08174	CD55	9	0	7	0.218684	0.259083
P08183	ABCB1	1	0.000130924	1	0.981955	0.245179
P08195	SLC3A2	41	0	18	0.243104	0.219083
P08236	GUSB	7	0	7	-0.0581354	0.737735
P08237	PFKM	42	0	23	-0.110842	0.604904
P08238	HSP90AB1	440	0	50	-0.151932	0.428617
P08240	SRPRA	23	0	16	0.0145741	0.773469
P08243	ASNS	37	0	18	0.0491872	0.532903
P08397	HMBS	12	0	8	-0.00250127	0.574703
P08559	PDHA1	28	0	16	0.000869498	0.965653
P08574	CYC1	14	0	9	0.252629	0.314898
P08579	SNRPB2	12	0	5	-0.183559	0.571248
P08581	MET	16	0	12	-0.0342555	0.593021
P08582	MELTF	10	0	10	0.130763	0.408213
P08621	SNRNP70	34	0	17	0.231384	0.451124
P08648	ITGA5	16	0	12	0.189502	0.048069
P08651	NFIC	3	0	2	-0.241947	0.219193
P08670	VIM	2	0	2	-0.106383	0.819076
P08708	RPS17	28	0	9	-0.114437	0.382653
P08727	KRT19	254	0	38	0.148782	0.35351
P08729	KRT7	14	0	11	0.0363389	0.824853
P08754	GNAI3	6	0	3	0.123704	0.879544
P08758	ANXA5	86	0	21	0.25521	0.555412
P08779	KRT16	2	0	2	-1.22606	0.486805
P08865	RPSA	39	0	11	0.00561472	0.613308
P08962	CD63	6	0	2	0.345975	0.0357245
P09001	MRPL3	15	0	8	-0.107151	0.960717
P09012	SNRPA	22	0	7	-0.0693479	0.84689
P09038	FGF2	1	0.000130924	1	0.158565	0.980164
P09104	ENO2	56	0	13	0.160964	0.58466
P09110	ACAA1	10	0	7	0.0859346	0.688212
P09132	SRP19	4	0	3	-0.0871011	0.521494
P09211	GSTP1	29	0	12	0.00414202	0.695756
P09234	SNRPC	10	0	4	0.14981	0.51625
P09382	LGALS1	37	0	9	-0.0768807	0.910177
P09417	QDPR	1	0.000130924	1	-0.448061	0.0917339
P09429	HMGB1	53	0	11	0.0543599	0.93266
P09455	RBP1	22	0	9	0.381493	0.482737
P09493	TPM1	8	0	5	0.340995	0.4959
P09496	CLTA	17	0	9	-0.00401545	0.628489
P09497	CLTB	13	0	7	0.0288333	0.803624
P09525	ANXA4	26	0	13	0.0748336	0.825296
P09543	CNP	23	0	17	0.0625785	0.499967
P09601	HMOX1	13	0	7	0.000318991	0.852448
P09622	DLD	33	0	14	0.0241384	0.759784
P09651	HNRNPA1	178	0	22	0.317419	0.0893463
P09661	SNRPA1	16	0	9	-0.080838	0.904928
P09669	COX6C	8	0	5	-0.221681	0.220767
P09874	PARP1	122	0	49	-0.13323	0.535749
P09884	POLA1	18	0	16	-0.193896	0.139827
P09958	FURIN	1	0.000130924	1	0.308734	0.771631
P09960	LTA4H	52	0	26	-0.063939	0.640068
P09972	ALDOC	21	0	13	0.125502	0.655772
P0C0L4	C4A	3	0	3	0.0348093	0.302725
P0C0S5	H2AZ1	21	0	3	0.0846143	0.759158
P0C2W1	FBXO45	4	0	2	-0.050402	0.381173
P0C7P0	CISD3	1	0.000130924	1	0.263814	0.110396
P0C7P3	SLFN14	3	0	1	-0.206255	0.293258
P0C7T5	ATXN1L	3	0	3	0.124769	0.959036
P0C860	MSL3P1	1	0.000130924	1	-0.177855	0.544841
P0CAP2	POLR2M	1	0.000130924	1	-0.0426867	0.223733
P0CG13	CHTF8	1	0.000130924	1	-0.0796417	0.198205
P0CG29	GSTT2	6	0	5	0.0625251	0.809497
P0CG39	POTEJ	2	0	2	0.256849	0.502235
P0CJ79	ZNF888	1	0.000130924	1	0.13588	0.78123
P0DJ07	PET100	1	0.000130924	1	-1.16067	1.06825e-05
P0DJ93	SMIM13	1	0.000130924	1	-0.0920354	0.659037
P0DMM9	SULT1A3	1	0.000130924	1	0.199539	0.046871
P0DMV8	HSPA1A	223	0	33	-0.0920818	0.546075
P0DP23	CALM1	40	0	11	-0.105971	0.563286
P0DPB6	POLR1D	4	0	4	0.303298	0.500258
P0DPD7	EEF1AKMT4	2	0	2	0.0901003	0.613641
P10070	GLI2	1	0.000130924	1	0.217575	0.976441
P10074	ZBTB48	2	0	2	0.0481806	0.331219
P10109	FDX1	3	0	2	-0.316267	0.0665881
P10155	RO60	24	0	14	-0.0724653	0.90434
P10244	MYBL2	1	0.000130924	1	-0.246411	0.611469
P10253	GAA	19	0	10	-0.00841188	0.734635
P10276	RARA	1	0.000130924	1	0.16896	0.941279
P10301	RRAS	10	0	6	0.226486	0.0439852
P10321	HLA-C	8	0	5	0.32768	0.189785
P10398	ARAF	9	0	6	0.0365226	0.917443
P10412	H1-4	89	0	15	0.0282422	0.393529
P10515	DLAT	26	0	16	-0.0704721	0.957505
P10586	PTPRF	12	0	9	0.311863	0.0314554
P10588	NR2F6	6	0	4	-0.115081	0.315114
P10589	NR2F1	2	0	2	-0.231862	0.0607699
P10599	TXN	57	0	6	-0.107411	0.481384
P10606	COX5B	19	0	8	0.0111487	0.369975
P10619	CTSA	12	0	6	-0.140727	0.165065
P10620	MGST1	1	0.000130924	1	-0.162617	0.856329
P10636	MAPT	13	0	10	-0.0261706	0.520644
P10644	PRKAR1A	34	0	21	-0.0946019	0.377477
P10646	TFPI	1	0.000130924	1	0.326839	0.00490764
P10768	ESD	23	0	11	-0.191058	0.45667
P10809	HSPD1	674	0	44	-0.0355921	0.932711
P10909	CLU	2	0	2	0.557211	0.00386447
P11021	HSPA5	121	0	32	0.137201	0.285997
P11047	LAMC1	8	0	8	0.103262	0.449104
P11117	ACP2	3	0	3	0.00503129	0.938231
P11137	MAP2	5	0	4	0.647347	0.00608755
P11142	HSPA8	490	0	39	-0.0921608	0.693925
P11161	EGR2	1	0.000130924	1	0.544762	0.389958
P11166	SLC2A1	10	0	6	-0.050884	0.83359
P11171	EPB41	11	0	8	-0.0699308	0.60572
P11172	UMPS	36	0	22	-0.138206	0.757224
P11177	PDHB	29	0	12	0.04072	0.905673
P11182	DBT	11	0	8	-0.00273902	0.988846
P11216	PYGB	37	0	25	-0.0277094	0.738603
P11217	PYGM	22	0	11	-0.07399	0.934194
P11233	RALA	6	0	3	0.02855	0.845597
P11234	RALB	10	0	5	0.0524877	0.316754
P11274	BCR	6	0	6	-0.131501	0.562504
P11277	SPTB	1	0.000130924	1	0.0823901	0.628717
P11279	LAMP1	12	0	6	0.10958	0.194433
P11310	ACADM	18	0	11	-0.0508143	0.875971
P11362	FGFR1	1	0.000130924	1	-0.45198	0.166848
P11387	TOP1	98	0	37	-0.0761271	0.709243
P11388	TOP2A	58	0	33	-0.14397	0.218422
P11413	G6PD	46	0	25	-0.0414806	0.85174
P11441	UBL4A	7	0	6	0.127241	0.792459
P11473	VDR	1	0.000130924	1	0.0951968	0.864656
P11474	ESRRA	7	0	5	-0.0130366	0.986374
P11498	PC	17	0	17	0.074319	0.610983
P11586	MTHFD1	89	0	40	-0.0669757	0.482538
P11717	IGF2R	51	0	40	0.0154757	0.92363
P11766	ADH5	23	0	12	-0.216223	0.628512
P11802	CDK4	15	0	10	-0.242909	0.0449894
P11908	PRPS2	8	0	6	0.0278984	0.674222
P11926	ODC1	4	0	4	-2.04356	9.56043e-07
P11940	PABPC1	108	0	35	-0.228455	0.234492
P12004	PCNA	61	0	15	0.0352519	0.591731
P12081	HARS1	48	0	25	-0.0985338	0.56083
P12109	COL6A1	4	0	4	0.429085	0.0519132
P12235	SLC25A4	14	0	6	0.00184599	0.557174
P12236	SLC25A6	3	0	1	-0.253278	0.306807
P12268	IMPDH2	64	0	23	-0.147704	0.383176
P12270	TPR	161	0	92	-0.0655695	0.683478
P12277	CKB	102	0	17	0.127025	0.394141
P12429	ANXA3	59	0	23	-0.0260927	0.99519
P12532	CKMT1A	16	0	9	0.0359884	0.987249
P12694	BCKDHA	4	0	3	-0.0135465	0.557214
P12755	SKI	2	0	2	-0.331947	0.0144051
P12757	SKIL	2	0	1	-0.39299	0.201151
P12814	ACTN1	140	0	48	-0.00958618	0.654961
P12830	CDH1	8	0	7	0.173834	0.446272
P12931	SRC	5	0	3	-0.0509019	0.836537
P12955	PEPD	15	0	9	-0.00711389	0.89404
P12956	XRCC6	135	0	37	-0.0428831	0.764258
P13010	XRCC5	138	0	38	-0.0514577	0.798562
P13051	UNG	4	0	3	-0.409949	0.0560336
P13073	COX4I1	23	0	8	-0.1942	0.166779
P13196	ALAS1	5	0	5	-0.904416	0.000532073
P13284	IFI30	3	0	1	0.358275	0.879608
P13473	LAMP2	3	0	2	0.330102	0.202809
P13489	RNH1	39	0	21	0.145574	0.349598
P13498	CYBA	2	0	1	-0.00183914	0.901284
P13611	VCAN	1	0.000130924	1	0.0307633	0.357908
P13631	RARG	1	0.000130924	1	0	0.278546
P13637	ATP1A3	8	0	7	0.0490772	0.619383
P13639	EEF2	389	0	55	-0.0889985	0.212372
P13645	KRT10	21	0	16	-0.741684	0.687469
P13646	KRT13	5	0	2	0.197699	0.461748
P13647	KRT5	7	0	5	-0.310562	0.999049
P13667	PDIA4	65	0	30	-0.053158	0.684564
P13674	P4HA1	20	0	14	0.0349541	0.824136
P13693	TPT1	57	0	11	-0.0448789	0.94909
P13716	ALAD	3	0	3	-0.244668	0.394784
P13726	F3	1	0.000130924	1	-0.3744	0.0954405
P13747	HLA-E	3	0	3	0.362123	0.366309
P13796	LCP1	1	0.000130924	1	0.131721	0.263535
P13797	PLS3	49	0	23	-0.0388332	0.920165
P13798	APEH	27	0	17	-0.101493	0.70543
P13804	ETFA	26	0	13	0.0475855	0.446464
P13807	GYS1	10	0	8	-0.0676144	0.588901
P13861	PRKAR2A	18	0	14	-0.010644	0.849698
P13929	ENO3	1	0.000130924	1	-0.0618503	0.321598
P13984	GTF2F2	18	0	13	-0.109028	0.682918
P13987	CD59	5	0	2	0.197698	0.42101
P13994	YJU2B	2	0	2	-0.192923	0.174226
P13995	MTHFD2	15	0	10	-0.0129899	0.300099
P14174	MIF	54	0	4	0.00271174	0.632659
P14209	CD99	3	0	1	0.347665	0.202619
P14314	PRKCSH	53	0	23	0.11573	0.329546
P14324	FDPS	19	0	9	-0.0764426	0.327925
P14373	TRIM27	3	0	2	-0.0993683	0.98984
P14406	COX7A2	5	0	2	-0.184135	0.368369
P14550	AKR1A1	28	0	19	-0.166564	0.37378
P14618	PKM	275	0	41	0.0313823	0.945148
P14621	ACYP2	2	0	1	0.0172639	0.57332
P14625	HSP90B1	181	0	43	0.16419	0.679453
P14635	CCNB1	14	0	9	-0.365366	0.119966
P14649	MYL6B	4	0	3	0.149615	0.949381
P14678	SNRPB	16	0	6	0.151919	0.12185
P14735	IDE	43	0	29	-0.154214	0.654779
P14854	COX6B1	10	0	5	0.195777	0.710094
P14859	POU2F1	5	0	4	-0.100333	0.730511
P14866	HNRNPL	56	0	24	0.138378	0.85383
P14868	DARS1	63	0	28	-0.18498	0.461542
P14921	ETS1	1	0.000130924	1	-0.253543	0.65811
P14923	JUP	52	0	22	-0.00955252	0.630479
P14927	UQCRB	6	0	4	0.220093	0.979617
P15018	LIF	2	0	1	0.284857	0.086034
P15056	BRAF	2	0	2	0.146855	0.861316
P15104	GLUL	7	0	6	-0.177625	0.142563
P15121	AKR1B1	9	0	7	-0.0925503	0.549163
P15151	PVR	5	0	4	0.0615455	0.328578
P15153	RAC2	6	0	2	-0.0142718	0.800639
P15170	GSPT1	9	0	7	0.0069711	0.703117
P15260	IFNGR1	2	0	2	0.0498341	0.640302
P15291	B4GALT1	2	0	2	-0.631464	0.031109
P15311	EZR	185	0	36	-0.0282235	0.873313
P15336	ATF2	2	0	1	-0.18762	0.389563
P15374	UCHL3	11	0	7	-0.130221	0.747866
P15407	FOSL1	4	0	2	0.0872965	0.600449
P15408	FOSL2	1	0.000130924	1	0.0464491	0.585995
P15514	AREG	5	0	3	0.107675	0.628452
P15529	CD46	1	0.000130924	1	1.12352	0.120309
P15531	NME1	30	0	7	0.0402745	0.922883
P15559	NQO1	18	0	9	0.0256163	0.724725
P15586	GNS	9	0	7	0.0423677	0.823394
P15735	PHKG2	3	0	3	0.218431	0.0805847
P15848	ARSB	6	0	6	0.0542847	0.872978
P15880	RPS2	85	0	16	-0.127132	0.40764
P15924	DSP	162	0	107	-0.148439	0.0592299
P15927	RPA2	17	0	7	0.0681533	0.172339
P15954	COX7C	2	0	1	0.167856	0.660148
P16070	CD44	20	0	9	0.218557	0.305733
P16083	NQO2	6	0	5	0.00263769	0.964027
P16104	H2AX	9	0	4	0.00267564	0.987526
P16144	ITGB4	58	0	40	0.168138	0.543983
P16219	ACADS	10	0	9	0.0515306	0.896934
P16220	CREB1	2	0	2	0.055395	0.886607
P16260	SLC25A16	1	0.000130924	1	-0.0436343	0.707391
P16278	GLB1	2	0	2	-0.056081	0.827169
P16298	PPP3CB	12	0	7	-0.0323671	0.934763
P16333	NCK1	11	0	8	0.0708604	0.705277
P16383	GCFC2	10	0	8	0.362463	0.453632
P16403	H1-2	2	0	1	-0.00727691	0.667352
P16422	EPCAM	24	0	11	0.0357004	0.460927
P16435	POR	33	0	22	-0.0770334	0.783195
P16455	MGMT	5	0	4	-0.322557	0.0210878
P16591	FER	6	0	5	-0.206823	0.721001
P16615	ATP2A2	68	0	38	-0.0160507	0.86948
P16870	CPE	1	0.000130924	1	1.1699	0.00470387
P16885	PLCG2	12	0	8	-0.138431	0.27118
P16930	FAH	3	0	2	-0.258358	0.23387
P16949	STMN1	31	0	14	0.339982	0.577347
P16989	YBX3	15	0	5	0.0712513	0.90503
P17026	ZNF22	2	0	2	-0.144235	0.946917
P17028	ZNF24	5	0	4	0.211264	0.82338
P17029	ZKSCAN1	7	0	4	0.217978	0.384199
P17035	ZNF28	1	0.000130924	1	-0.374573	0.186681
P17050	NAGA	4	0	3	-0.0906274	0.524004
P17081	RHOQ	1	0.000130924	1	0.146059	0.591633
P17096	HMGA1	13	0	7	-0.105424	0.376722
P17097	ZNF7	2	0	2	-0.0170202	0.38761
P17152	TMEM11	2	0	2	0.344236	0.0202454
P17174	GOT1	38	0	19	-0.176461	0.795931
P17252	PRKCA	7	0	6	0.132155	0.984568
P17275	JUNB	9	0	6	0.490472	0.0644441
P17301	ITGA2	14	0	12	0.108332	0.349199
P17480	UBTF	48	0	28	0.0309316	0.716234
P17481	HOXB8	1	0.000130924	1	-0.275072	0.174889
P17483	HOXB4	4	0	3	0.0180476	0.896365
P17535	JUND	6	0	6	0.0724678	0.658138
P17544	ATF7	2	0	2	-0.0453682	0.9384
P17568	NDUFB7	11	0	5	0.0474864	0.880766
P17612	PRKACA	7	0	4	0.136371	0.506129
P17655	CAPN2	28	0	20	0.0295917	0.726324
P17676	CEBPB	1	0.000130924	1	-0.289731	0.941933
P17706	PTPN2	11	0	7	-0.113593	0.275283
P17707	AMD1	5	0	4	-0.361547	0.00541147
P17812	CTPS1	29	0	21	-0.0681753	0.96891
P17844	DDX5	151	0	31	-0.113462	0.551806
P17858	PFKL	40	0	21	-0.0498598	0.533307
P17900	GM2A	4	0	2	0.0464327	0.521219
P17931	LGALS3	17	0	8	-0.0217097	0.789484
P17948	FLT1	1	0.000130924	1	0.106701	0.696364
P17980	PSMC3	70	0	24	-0.0319193	0.931901
P17987	TCP1	119	0	28	-0.0277722	0.83798
P18031	PTPN1	27	0	12	-0.022216	0.98722
P18065	IGFBP2	4	0	4	0.734557	0.0063331
P18074	ERCC2	15	0	12	-0.0252529	0.77032
P18077	RPL35A	26	0	6	-0.152101	0.614021
P18084	ITGB5	6	0	5	-0.0461279	0.884571
P18085	ARF4	11	0	4	-0.136155	0.609144
P18124	RPL7	46	0	14	-0.244753	0.541358
P18146	EGR1	3	0	2	1.45088	7.19217e-06
P18206	VCL	160	0	59	-0.081318	0.695321
P18433	PTPRA	3	0	2	-0.112127	0.694988
P18583	SON	62	0	37	0.0557658	0.479285
P18615	NELFE	14	0	8	0.247866	0.735276
P18621	RPL17	73	0	8	-0.00966409	0.40079
P18669	PGAM1	61	0	12	-0.203664	0.225802
P18754	RCC1	34	0	13	-0.0504494	0.946511
P18827	SDC1	3	0	2	-0.0135508	0.883255
P18846	ATF1	3	0	2	-0.060221	0.804537
P18850	ATF6	3	0	3	-0.482417	0.000743361
P18858	LIG1	24	0	17	-0.0599589	0.494803
P18859	ATP5PF	7	0	4	-0.212722	0.605237
P18887	XRCC1	8	0	7	-0.00654041	0.800434
P19021	PAM	4	0	4	-0.133352	0.764384
P19174	PLCG1	16	0	11	-0.10378	0.301971
P19256	CD58	1	0.000130924	1	-0.0188041	0.99817
P19338	NCL	322	0	47	0.131322	0.307719
P19367	HK1	49	0	34	-0.0691872	0.819599
P19387	POLR2C	8	0	6	-0.0937552	0.215065
P19388	POLR2E	8	0	4	-0.0197505	0.610155
P19404	NDUFV2	17	0	11	-0.0435898	0.848727
P19419	ELK1	1	0.000130924	1	0.14385	0.811263
P19447	ERCC3	12	0	11	0.0348584	0.547841
P19474	TRIM21	4	0	3	-0.0215617	0.309962
P19525	EIF2AK2	19	0	14	-0.0680671	0.62575
P19532	TFE3	2	0	2	-0.106437	0.612924
P19623	SRM	25	0	12	-0.0439879	0.521235
P19634	SLC9A1	1	0.000130924	1	-0.0722318	0.951181
P19784	CSNK2A2	15	0	11	0.0709998	0.825546
P19793	RXRA	8	0	6	-0.0719287	0.153091
P19838	NFKB1	12	0	10	-0.00643656	0.76752
P19971	TYMP	13	0	10	0.325044	0.338138
P20020	ATP2B1	24	0	18	0.0596148	0.683395
P20042	EIF2S2	19	0	13	-0.144981	0.46028
P20073	ANXA7	37	0	14	-0.1338	0.374546
P20226	TBP	4	0	4	0.0456936	0.493579
P20248	CCNA2	6	0	4	-0.138864	0.163448
P20290	BTF3	41	0	11	-0.256485	0.0935158
P20337	RAB3B	4	0	2	-0.179617	0.791181
P20338	RAB4A	10	0	7	-0.00919419	0.62052
P20339	RAB5A	15	0	8	0.117222	0.314639
P20340	RAB6A	15	0	8	0.104622	0.12538
P20618	PSMB1	24	0	9	-0.047627	0.863918
P20645	M6PR	13	0	4	0.0802206	0.584056
P20671	H2AC7	143	0	6	0.0887634	0.913987
P20674	COX5A	21	0	8	0.113146	0.738129
P20700	LMNB1	100	0	42	0.0377225	0.953454
P20742	PZP	1	0.000130924	1	0.462507	0.094898
P20749	BCL3	1	0.000130924	1	-0.0876018	0.412141
P20810	CAST	24	0	19	-0.0108698	0.724732
P20839	IMPDH1	10	0	6	-0.156066	0.865254
P20936	RASA1	6	0	6	-0.031778	0.318654
P20962	PTMS	12	0	5	-0.142925	0.764702
P21127	CDK11B	32	0	22	0.0403535	0.769769
P21281	ATP6V1B2	26	0	16	0.103004	0.511347
P21283	ATP6V1C1	28	0	16	-0.0684235	0.914821
P21291	CSRP1	10	0	7	-0.0213823	0.950776
P21333	FLNA	243	0	106	-0.0422079	0.995282
P21397	MAOA	5	0	4	-0.149627	0.236021
P21399	ACO1	33	0	23	-0.0799728	0.495337
P21579	SYT1	11	0	9	-0.0178165	0.465543
P21583	KITLG	2	0	2	-0.181826	0.32887
P21589	NT5E	24	0	16	0.0794066	0.497242
P21675	TAF1	14	0	13	-0.015441	0.956038
P21695	GPD1	3	0	2	-0.0970385	0.880521
P21709	EPHA1	1	0.000130924	1	0.16309	0.548067
P21796	VDAC1	35	0	14	-0.195375	0.655989
P21802	FGFR2	2	0	2	0.149824	0.25591
P21860	ERBB3	1	0.000130924	1	-0.184335	0.717856
P21912	SDHB	10	0	5	0.0903543	0.209051
P21926	CD9	10	0	6	0.086346	0.752157
P21964	COMT	11	0	10	0.272862	0.574941
P21980	TGM2	4	0	3	0.267305	0.514388
P22033	MMUT	10	0	10	-0.0348247	0.918753
P22059	OSBP	27	0	16	-0.0298899	0.922109
P22061	PCMT1	27	0	12	-0.0012988	0.545812
P22087	FBL	19	0	8	-0.226593	0.271629
P22102	GART	102	0	39	-0.100679	0.417559
P22223	CDH3	20	0	12	0.0325516	0.707609
P22234	PAICS	74	0	22	-0.00889586	0.984491
P22307	SCP2	27	0	12	0.0681944	0.445808
P22314	UBA1	89	0	43	-0.0906699	0.736034
P22392	NME2	87	0	10	-0.0449659	0.767847
P22413	ENPP1	3	0	3	0.276363	0.711943
P22415	USF1	5	0	3	-0.0277892	0.531826
P22455	FGFR4	1	0.000130924	1	-0.0128557	0.555801
P22466	GAL	1	0.000130924	1	1.74145	0.00243231
P22492	H1-6	1	0.000130924	1	0.2275	0.0600458
P22570	FDXR	25	0	18	0.0796676	0.597076
P22626	HNRNPA2B1	166	0	23	0.114901	0.392443
P22670	RFX1	10	0	9	-0.0569589	0.86681
P22676	CALB2	10	0	9	0.163602	0.16914
P22681	CBL	13	0	9	0.0455619	0.661962
P22694	PRKACB	13	0	10	-0.107347	0.739722
P22695	UQCRC2	34	0	15	-0.101134	0.227051
P22736	NR4A1	3	0	2	0.304918	0.184878
P22830	FECH	11	0	10	-0.0543977	0.592528
P23025	XPA	2	0	2	0.0419214	0.961404
P23142	FBLN1	1	0.000130924	1	0.164379	0.164819
P23193	TCEA1	17	0	9	-0.00814371	0.41081
P23229	ITGA6	25	0	17	0.194898	0.422066
P23246	SFPQ	72	0	27	-0.0835649	0.438666
P23258	TUBG1	28	0	18	-0.0713172	0.362171
P23284	PPIB	45	0	11	-0.151615	0.725044
P23368	ME2	21	0	15	-0.0943068	0.607588
P23381	WARS1	28	0	20	0.031657	0.833835
P23396	RPS3	91	0	18	0.00353904	0.888763
P23434	GCSH	7	0	3	0.122101	0.752398
P23443	RPS6KB1	7	0	5	-0.0159898	0.554369
P23458	JAK1	4	0	4	-0.191976	0.0798225
P23469	PTPRE	5	0	4	-0.0074766	0.588252
P23470	PTPRG	7	0	7	0.066604	0.32843
P23497	SP100	13	0	7	-0.0435586	0.888863
P23508	MCC	10	0	8	0.0500173	0.412186
P23511	NFYA	5	0	2	0.101696	0.807855
P23526	AHCY	75	0	15	-0.133529	0.497948
P23527	H2BC17	486	0	11	0.0462351	0.343347
P23528	CFL1	39	0	12	0.0653451	0.876857
P23588	EIF4B	51	0	29	0.0431354	0.990797
P23610	F8A1	4	0	4	-0.236447	0.0465052
P23634	ATP2B4	8	0	7	0.131882	0.318849
P23677	ITPKA	4	0	3	-0.0545316	0.829873
P23743	DGKA	6	0	5	-0.155785	0.445937
P23786	CPT2	22	0	16	-0.0630395	0.635207
P23919	DTYMK	25	0	14	0.0192196	0.847044
P23921	RRM1	49	0	27	-0.107289	0.513919
P24385	CCND1	6	0	4	-1.03394	1.26844e-05
P24386	CHM	4	0	3	0.0388503	0.994374
P24390	KDELR1	2	0	2	0.345968	0.23759
P24462	CYP3A7	1	0.000130924	1	-0.0640751	0.834432
P24468	NR2F2	9	0	6	-0.17333	0.300012
P24534	EEF1B2	57	0	10	-0.0771619	0.732546
P24539	ATP5PB	19	0	10	-0.289706	0.420602
P24592	IGFBP6	2	0	1	1.24066	0.0413227
P24666	ACP1	10	0	6	0.00266617	0.815147
P24752	ACAT1	34	0	19	-0.0749369	0.817212
P24844	MYL9	27	0	8	-0.0312074	0.807247
P24928	POLR2A	53	0	38	-0.14102	0.0467122
P24941	CDK2	15	0	11	-0.141958	0.302647
P25054	APC	7	0	7	-0.0497963	0.582114
P25098	GRK2	26	0	20	-0.132436	0.32535
P25205	MCM3	83	0	41	-0.00706825	0.785083
P25208	NFYB	4	0	2	0.662435	0.216665
P25325	MPST	16	0	9	-0.051451	0.766102
P25398	RPS12	42	0	7	-0.122542	0.833497
P25440	BRD2	13	0	11	-0.0528271	0.403948
P25445	FAS	4	0	4	0.179656	0.0742537
P25490	YY1	18	0	10	-0.0227959	0.665983
P25685	DNAJB1	33	0	16	-0.0407218	0.58637
P25686	DNAJB2	3	0	3	0.0788925	0.956515
P25705	ATP5F1A	142	0	30	-0.141697	0.876537
P25786	PSMA1	31	0	16	-0.195141	0.50098
P25787	PSMA2	16	0	10	0.00341416	0.685069
P25788	PSMA3	26	0	10	0.117826	0.21938
P25789	PSMA4	23	0	13	-0.0927278	0.810731
P25942	CD40	3	0	2	0.357823	0.450938
P26006	ITGA3	21	0	16	0.175917	0.238117
P26038	MSN	74	0	34	-0.0387901	0.897319
P26045	PTPN3	2	0	2	0.0690666	0.34961
P26196	DDX6	31	0	16	-0.048301	0.819162
P26358	DNMT1	77	0	45	-0.16131	0.191999
P26367	PAX6	1	0.000130924	1	-0.0054777	0.645835
P26368	U2AF2	39	0	14	0.0321702	0.613613
P26373	RPL13	37	0	11	-0.160994	0.578124
P26440	IVD	13	0	11	0.0335097	0.928455
P26447	S100A4	56	0	5	-0.0159775	0.87399
P26572	MGAT1	3	0	3	-0.110096	0.530598
P26583	HMGB2	38	0	13	0.159023	0.771477
P26599	PTBP1	44	0	17	0.0291581	0.438755
P26639	TARS1	79	0	35	-0.108897	0.587612
P26640	VARS1	94	0	41	0.0123996	0.782381
P26641	EEF1G	98	0	25	-0.25161	0.412034
P26651	ZFP36	2	0	1	0.868386	0.00112203
P26885	FKBP2	13	0	6	0.0106677	0.98424
P27105	STOM	5	0	4	0.0909892	0.147112
P27144	AK4	16	0	8	-0.0242871	0.995593
P27338	MAOB	11	0	7	0.0746952	0.567351
P27348	YWHAQ	39	0	12	-0.174552	0.258691
P27361	MAPK3	8	0	6	-0.0159521	0.384816
P27448	MARK3	16	0	10	-0.0554753	0.869236
P27487	DPP4	1	0.000130924	1	-0.160856	0.88189
P27540	ARNT	2	0	2	-0.131298	0.287793
P27635	RPL10	55	0	11	-0.22226	0.261464
P27694	RPA1	37	0	21	0.00977214	0.662531
P27695	APEX1	31	0	14	-0.0596799	0.75561
P27707	DCK	11	0	7	0.00747071	0.71599
P27708	CAD	98	0	60	-0.0338789	0.606705
P27797	CALR	93	0	20	0.149592	0.262473
P27815	PDE4A	2	0	2	-0.262593	0.10286
P27816	MAP4	89	0	43	-0.108567	0.202096
P27824	CANX	99	0	24	0.0792677	0.585955
P27986	PIK3R1	6	0	6	-0.0248596	0.995504
P28065	PSMB9	2	0	2	0.0358735	0.330942
P28066	PSMA5	60	0	8	0.288074	0.30422
P28070	PSMB4	19	0	7	0.0698829	0.399598
P28072	PSMB6	15	0	7	-0.0348653	0.716609
P28074	PSMB5	36	0	13	0.114141	0.153334
P28288	ABCD3	22	0	14	-0.0772916	0.89539
P28290	ITPRID2	64	0	38	-0.0452319	0.377246
P28331	NDUFS1	31	0	21	0.0681055	0.714893
P28340	POLD1	35	0	25	-0.0185508	0.718816
P28347	TEAD1	2	0	2	0.205817	0.095733
P28370	SMARCA1	10	0	10	-0.0695874	0.747063
P28482	MAPK1	23	0	12	-0.118679	0.682773
P28676	GCA	11	0	8	-0.0253614	0.738526
P28702	RXRB	6	0	5	-0.0180627	0.665241
P28715	ERCC5	1	0.000130924	1	0.425823	0.0467904
P28749	RBL1	9	0	8	0.0184206	0.663521
P28799	GRN	16	0	12	0.405091	0.04014
P28838	LAP3	55	0	24	0.0379801	0.741488
P29034	S100A2	1	0.000130924	1	-0.248417	0.137432
P29083	GTF2E1	9	0	6	0.318971	0.496983
P29084	GTF2E2	15	0	13	-0.103413	0.452019
P29144	TPP2	30	0	23	-0.0181856	0.915698
P29218	IMPA1	21	0	13	-0.136242	0.500855
P29279	CCN2	6	0	6	2.28989	1.12256e-05
P29317	EPHA2	35	0	21	-0.0119899	0.960606
P29323	EPHB2	1	0.000130924	1	0.0869097	0.368212
P29350	PTPN6	12	0	8	-0.190783	0.250836
P29353	SHC1	9	0	8	0.0186219	0.543021
P29372	MPG	11	0	8	0.0530346	0.955509
P29373	CRABP2	11	0	8	-0.22702	0.121571
P29375	KDM5A	1	0.000130924	1	-0.00939597	0.518902
P29401	TKT	81	0	29	-0.133451	0.463043
P29590	PML	14	0	10	0.0442234	0.859771
P29692	EEF1D	51	0	15	0.0167971	0.806919
P29966	MARCKS	4	0	3	0.558736	0.294006
P29992	GNA11	22	0	11	-0.012452	0.586082
P30038	ALDH4A1	10	0	9	0.0280271	0.899573
P30040	ERP29	24	0	11	0.0166881	0.470668
P30041	PRDX6	51	0	17	0.0108778	0.79032
P30043	BLVRB	17	0	8	0.0177588	0.486789
P30044	PRDX5	22	0	10	0.0296498	0.752695
P30046	DDT	13	0	5	-0.0743941	0.465375
P30048	PRDX3	32	0	11	-0.0186859	0.468025
P30049	ATP5F1D	6	0	3	-0.0623292	0.980957
P30050	RPL12	37	0	11	-0.233036	0.496099
P30084	ECHS1	27	0	14	-0.0202492	0.846272
P30085	CMPK1	13	0	8	-0.066962	0.789424
P30086	PEBP1	21	0	9	0.00847805	0.91292
P30101	PDIA3	98	0	35	-0.0533052	0.639125
P30153	PPP2R1A	82	0	29	-0.0601401	0.759863
P30154	PPP2R1B	21	0	13	0.0709667	0.955467
P30260	CDC27	16	0	13	-0.211484	0.393393
P30281	CCND3	2	0	2	-0.0630881	0.34375
P30291	WEE1	3	0	3	0.162145	0.771594
P30305	CDC25B	4	0	3	-0.72615	9.986e-05
P30307	CDC25C	7	0	5	-0.35635	0.0721187
P30405	PPIF	16	0	5	0.120256	0.991284
P30414	NKTR	5	0	4	0.116593	0.988873
P30419	NMT1	29	0	11	-0.149228	0.439525
P30511	HLA-F	1	0.000130924	1	0.270882	0.349172
P30519	HMOX2	33	0	16	0.059326	0.379127
P30520	ADSS2	20	0	14	-0.095952	0.835197
P30530	AXL	7	0	7	0.0438748	0.615383
P30533	LRPAP1	27	0	18	0.11123	0.375096
P30536	TSPO	1	0.000130924	1	-0.0197186	0.86768
P30566	ADSL	25	0	15	-0.203853	0.349244
P30622	CLIP1	39	0	31	-0.0225105	0.947933
P30626	SRI	21	0	9	0.133163	0.685449
P30740	SERPINB1	20	0	13	-0.0694205	0.967574
P30793	GCH1	3	0	3	-0.0251674	0.442321
P30825	SLC7A1	8	0	5	0.00119602	0.932183
P30837	ALDH1B1	21	0	14	0.0471179	0.924763
P30876	POLR2B	49	0	34	0.0115859	0.539193
P30989	NTSR1	2	0	2	0.192569	0.0963926
P31040	SDHA	32	0	21	0.0261882	0.835559
P31150	GDI1	24	0	10	-0.0947911	0.807317
P31153	MAT2A	35	0	18	-0.207503	0.251443
P31260	HOXA10	2	0	2	-0.203114	0.178068
P31321	PRKAR1B	1	0.000130924	1	0.00338061	0.649917
P31323	PRKAR2B	6	0	5	-0.019658	0.567207
P31327	CPS1	7	0	6	0.103446	0.552001
P31350	RRM2	33	0	15	0.0874253	0.546234
P31431	SDC4	5	0	4	-0.232768	0.012616
P31483	TIA1	6	0	4	0.107776	0.711239
P31689	DNAJA1	36	0	19	-0.106711	0.249301
P31749	AKT1	9	0	8	-0.228312	0.248212
P31751	AKT2	1	0.000130924	1	-0.218595	0.371178
P31930	UQCRC1	36	0	18	-0.0446665	0.267455
P31937	HIBADH	10	0	8	-0.133272	0.297973
P31939	ATIC	69	0	30	-0.116741	0.412842
P31942	HNRNPH3	47	0	10	-0.00295144	0.807004
P31943	HNRNPH1	112	0	18	0.210884	0.700729
P31946	YWHAB	89	0	14	-0.0161127	0.971809
P31947	SFN	63	0	15	-0.0277089	0.847111
P31948	STIP1	138	0	39	-0.0449694	0.760909
P31949	S100A11	15	0	5	0.103416	0.814593
P32019	INPP5B	4	0	4	0.0211185	0.333437
P32119	PRDX2	31	0	11	-0.0226644	0.920983
P32121	ARRB2	7	0	5	-0.0130988	0.805329
P32189	GK	1	0.000130924	1	-0.0704653	0.562007
P32320	CDA	4	0	2	0.563214	0.463307
P32321	DCTD	4	0	3	-0.0358325	0.647576
P32322	PYCR1	22	0	10	-0.192863	0.321226
P32519	ELF1	2	0	2	-0.0722922	0.844061
P32780	GTF2H1	6	0	5	-0.103107	0.379442
P32856	STX2	3	0	3	0.143702	0.469413
P32929	CTH	4	0	4	0.214399	0.0852817
P32969	RPL9	34	0	9	-0.0953014	0.433481
P33121	ACSL1	10	0	8	-0.0727184	0.998804
P33176	KIF5B	93	0	54	-0.101221	0.335972
P33240	CSTF2	14	0	10	0.156891	0.548279
P33316	DUT	20	0	11	0.213271	0.505453
P33527	ABCC1	13	0	12	0.289117	0.163135
P33552	CKS2	4	0	3	-0.358257	0.104633
P33908	MAN1A1	3	0	3	-0.420033	0.206996
P33981	TTK	6	0	5	-0.22297	0.138383
P33991	MCM4	83	0	41	-0.0483243	0.696887
P33992	MCM5	60	0	29	-0.216713	0.553867
P33993	MCM7	59	0	31	-0.0166705	0.522735
P34059	GALNS	2	0	2	0.0774509	0.560856
P34896	SHMT1	15	0	12	0.0495819	0.498394
P34897	SHMT2	78	0	23	-0.0674692	0.914271
P34913	EPHX2	2	0	2	0.16252	0.92678
P34932	HSPA4	111	0	45	-0.0917572	0.490216
P34949	MPI	7	0	6	0.0628543	0.907231
P35052	GPC1	18	0	11	0.302513	0.413198
P35080	PFN2	9	0	4	-0.140099	0.532512
P35219	CA8	1	0.000130924	1	-0.505043	0.0685987
P35221	CTNNA1	65	0	42	-0.0767938	0.323707
P35222	CTNNB1	40	0	23	-0.11766	0.349143
P35226	BMI1	4	0	3	-0.133172	0.325544
P35227	PCGF2	1	0.000130924	1	0.445836	0.446422
P35232	PHB	42	0	16	0.0410697	0.759937
P35237	SERPINB6	12	0	6	-0.140929	0.521163
P35240	NF2	14	0	11	-0.200396	0.2517
P35241	RDX	122	0	34	-0.0751032	0.80204
P35244	RPA3	12	0	5	0.054691	0.349216
P35249	RFC4	25	0	17	-0.0276171	0.638115
P35250	RFC2	18	0	10	0.112234	0.330122
P35251	RFC1	32	0	22	-0.103064	0.472908
P35268	RPL22	11	0	3	0.179343	0.284329
P35269	GTF2F1	27	0	13	0.0917605	0.728609
P35270	SPR	16	0	7	-0.0107289	0.868886
P35346	SSTR5	1	0.000130924	1	0.0981188	0.235446
P35527	KRT9	26	0	17	-0.447547	0.96527
P35568	IRS1	9	0	9	0.0140374	0.780399
P35573	AGL	47	0	36	-0.0972833	0.504918
P35579	MYH9	306	0	101	0.00224412	0.604158
P35580	MYH10	110	0	68	0.0237133	0.858583
P35606	COPB2	37	0	24	-0.110353	0.615773
P35610	SOAT1	7	0	6	-0.137214	0.68945
P35611	ADD1	7	0	7	-0.129026	0.427024
P35613	BSG	38	0	13	0.174485	0.181111
P35626	GRK3	1	0.000130924	1	-0.0780004	0.72304
P35637	FUS	21	0	9	0.264749	0.377519
P35658	NUP214	16	0	13	-0.0123483	0.756845
P35659	DEK	33	0	10	0.0414554	0.517216
P35680	HNF1B	2	0	2	-0.0115921	0.778392
P35754	GLRX	2	0	2	-0.127066	0.66921
P35790	CHKA	4	0	4	-0.18717	0.724319
P35813	PPM1A	12	0	8	0.152868	0.55666
P35869	AHR	1	0.000130924	1	-0.383888	0.0104403
P35900	KRT20	1	0.000130924	1	0.201741	0.161283
P35908	KRT2	17	0	13	-0.492184	0.889882
P35914	HMGCL	7	0	6	0.138739	0.405904
P35998	PSMC2	47	0	21	-0.106945	0.482393
P36383	GJC1	1	0.000130924	1	3.07178	0.346755
P36404	ARL2	8	0	5	-0.193644	0.522444
P36405	ARL3	10	0	7	-0.108859	0.305988
P36507	MAP2K2	14	0	7	-0.169379	0.157953
P36508	ZNF76	5	0	4	0.0837455	0.877748
P36542	ATP5F1C	38	0	12	-0.100378	0.627351
P36543	ATP6V1E1	17	0	10	-0.120914	0.173712
P36551	CPOX	65	0	22	-0.095641	0.44617
P36578	RPL4	92	0	22	-0.278446	0.357969
P36639	NUDT1	8	0	5	-0.144479	0.483083
P36776	LONP1	40	0	27	-0.112747	0.567168
P36871	PGM1	32	0	17	-0.109711	0.498662
P36873	PPP1CC	35	0	13	0.105226	0.119525
P36897	TGFBR1	1	0.000130924	1	0.682503	0.0138874
P36915	GNL1	24	0	13	-0.0853524	0.650001
P36941	LTBR	3	0	2	0.358474	0.51276
P36952	SERPINB5	16	0	10	-0.0164592	0.793403
P36954	POLR2I	6	0	5	0.254504	0.709586
P36956	SREBF1	5	0	5	0.115718	0.119631
P36957	DLST	15	0	11	-0.0687538	0.831715
P36959	GMPR	7	0	6	-0.220941	0.226226
P36969	GPX4	3	0	3	-0.110515	0.0784537
P37108	SRP14	6	0	6	0.0386901	0.936691
P37173	TGFBR2	1	0.000130924	1	0.301988	0.247721
P37198	NUP62	19	0	12	0.0908366	0.686462
P37235	HPCAL1	18	0	12	0.0639472	0.869094
P37268	FDFT1	7	0	4	-0.118311	0.33861
P37287	PIGA	2	0	2	0.158885	0.24752
P37802	TAGLN2	64	0	15	0.0389351	0.956021
P37837	TALDO1	58	0	16	-0.289759	0.430997
P38117	ETFB	41	0	15	0.0258287	0.715427
P38159	RBMX	42	0	18	0.156987	0.154494
P38432	COIL	17	0	12	0.0224816	0.921361
P38435	GGCX	2	0	1	-0.0873636	0.432954
P38571	LIPA	1	0.000130924	1	-0.103625	0.859723
P38606	ATP6V1A	48	0	24	-0.033106	0.919746
P38646	HSPA9	156	0	45	0.0204252	0.673021
P38919	EIF4A3	70	0	21	-0.0937048	0.582869
P38935	IGHMBP2	10	0	9	-0.0349066	0.586512
P38936	CDKN1A	7	0	4	-0.0372289	0.372599
P39019	RPS19	73	0	13	-0.217043	0.520845
P39023	RPL3	62	0	21	-0.129653	0.411944
P39060	COL18A1	4	0	4	0.338686	0.00397582
P39210	MPV17	1	0.000130924	1	-0.133035	0.687182
P39656	DDOST	23	0	12	-0.0165713	0.457068
P39687	ANP32A	24	0	8	0.0564935	0.850414
P39748	FEN1	28	0	14	-0.00673975	0.85523
P39880	CUX1	13	0	12	0.0016832	0.882114
P40121	CAPG	21	0	10	0.0626888	0.963986
P40123	CAP2	2	0	2	0.00639338	0.406407
P40189	IL6ST	1	0.000130924	1	0.156496	0.0622328
P40222	TXLNA	35	0	19	-0.0264492	0.679461
P40227	CCT6A	103	0	29	-0.074104	0.738167
P40306	PSMB10	1	0.000130924	1	-0.162928	0.742356
P40337	VHL	2	0	2	-0.0409865	0.905261
P40425	PBX2	2	0	1	0.332077	0.616178
P40429	RPL13A	39	0	10	-0.352033	0.54874
P40616	ARL1	3	0	3	-0.0636541	0.782126
P40763	STAT3	21	0	15	-0.141698	0.146315
P40818	USP8	23	0	20	-0.00469913	0.756456
P40855	PEX19	8	0	5	0.199335	0.610497
P40879	SLC26A3	1	0.000130924	1	-0.0988941	0.97268
P40925	MDH1	40	0	19	0.0130421	0.816467
P40926	MDH2	54	0	16	-0.0790752	0.965643
P40937	RFC5	23	0	13	-0.00351961	0.684068
P40938	RFC3	24	0	14	0.0884747	0.634757
P40939	HADHA	62	0	32	-0.120986	0.661431
P41091	EIF2S3	34	0	21	0.00820812	0.659141
P41134	ID1	2	0	2	-0.352278	0.0819882
P41162	ETV3	2	0	2	-0.0518128	0.321616
P41208	CETN2	9	0	5	-0.0818829	0.297204
P41212	ETV6	5	0	4	-0.0444355	0.708001
P41214	EIF2D	21	0	15	-0.0966504	0.353969
P41223	BUD31	8	0	6	0.108919	0.716982
P41227	NAA10	21	0	12	-0.0184911	0.608364
P41229	KDM5C	5	0	5	-0.289094	0.0456991
P41236	PPP1R2	11	0	6	0.000798413	0.919937
P41240	CSK	15	0	9	-0.119565	0.570527
P41250	GARS1	51	0	33	-0.0891108	0.861749
P41252	IARS1	83	0	44	-0.114762	0.473752
P41273	TNFSF9	1	0.000130924	1	0.519414	0.590126
P41440	SLC19A1	8	0	6	0.128041	0.127496
P41567	EIF1	8	0	5	-0.114221	0.227943
P41743	PRKCI	3	0	3	-0.187528	0.381865
P42025	ACTR1B	4	0	3	0.0127304	0.437021
P42126	ECI1	14	0	6	-0.0511014	0.796851
P42166	TMPO	40	0	26	0.189817	0.247276
P42167	TMPO	22	0	8	0.295424	0.351508
P42224	STAT1	27	0	16	-0.0223454	0.512429
P42226	STAT6	2	0	2	-0.100693	0.618498
P42285	MTREX	63	0	37	-0.0884973	0.769191
P42336	PIK3CA	2	0	2	-0.011607	0.840288
P42338	PIK3CB	4	0	3	-0.124644	0.182043
P42345	MTOR	35	0	31	-0.0564642	0.649941
P42356	PI4KA	12	0	11	0.0487043	0.988139
P42566	EPS15	16	0	13	0.0555874	0.619085
P42574	CASP3	5	0	4	-0.0603582	0.604842
P42575	CASP2	3	0	3	-0.224804	0.157226
P42677	RPS27	6	0	2	-0.117236	0.488888
P42684	ABL2	1	0.000130924	1	0.0496934	0.817454
P42694	HELZ	15	0	12	0.00226246	0.959488
P42695	NCAPD3	11	0	10	-0.190789	0.166965
P42696	RBM34	20	0	15	-0.134989	0.812154
P42704	LRPPRC	166	0	73	0.0353669	0.834216
P42765	ACAA2	5	0	5	-0.0615207	0.641868
P42766	RPL35	13	0	4	-0.0860102	0.903239
P42772	CDKN2B	1	0.000130924	1	0.267526	0.348613
P42773	CDKN2C	1	0.000130924	1	0.490047	0.753112
P42785	PRCP	10	0	7	0.00505742	0.687857
P42858	HTT	4	0	4	-0.110888	0.437179
P42892	ECE1	30	0	16	0.265077	0.291204
P42898	MTHFR	1	0.000130924	1	0.198735	0.745803
P43034	PAFAH1B1	15	0	11	-0.0495045	0.627672
P43121	MCAM	11	0	7	0.26167	0.37021
P43243	MATR3	69	0	33	0.0520888	0.697977
P43246	MSH2	32	0	24	-0.158604	0.543969
P43250	GRK6	5	0	5	-0.157457	0.324748
P43304	GPD2	76	0	42	-0.0465479	0.974589
P43307	SSR1	9	0	4	0.334838	0.494247
P43353	ALDH3B1	2	0	2	-0.182845	0.997823
P43354	NR4A2	2	0	2	0.157008	0.493824
P43356	MAGEA2	3	0	2	-0.826742	8.88072e-05
P43378	PTPN9	6	0	6	-0.0320722	0.628711
P43487	RANBP1	29	0	8	-0.0717226	0.992254
P43490	NAMPT	49	0	22	-0.0382066	0.630374
P43686	PSMC4	44	0	21	0.0818498	0.803023
P43897	TSFM	25	0	11	-0.0619363	0.652591
P45877	PPIC	2	0	2	0.0853948	0.872547
P45880	VDAC2	37	0	15	-0.163449	0.695662
P45954	ACADSB	14	0	10	-0.144835	0.588285
P45973	CBX5	9	0	4	0.187409	0.0822801
P45974	USP5	36	0	21	-0.0067497	0.491079
P45983	MAPK8	5	0	5	-0.01272	0.70316
P45984	MAPK9	3	0	2	-0.0957465	0.734011
P45985	MAP2K4	12	0	8	-0.191797	0.247643
P46013	MKI67	244	0	140	0.0502166	0.548014
P46019	PHKA2	1	0.000130924	1	-0.22109	0.588038
P46020	PHKA1	1	0.000130924	1	0.204639	0.655953
P46060	RANGAP1	55	0	25	0.00594206	0.822995
P46063	RECQL	32	0	19	0.00230154	0.663271
P46087	NOP2	36	0	20	-0.122521	0.872531
P46100	ATRX	16	0	15	0.0262045	0.917667
P46108	CRK	11	0	9	0.0206845	0.70223
P46109	CRKL	16	0	10	-0.117398	0.525295
P46199	MTIF2	10	0	8	-0.0626547	0.336063
P46379	BAG6	40	0	25	0.040162	0.817804
P46459	NSF	52	0	29	-0.025821	0.756832
P46527	CDKN1B	2	0	2	-0.0740132	0.930443
P46531	NOTCH1	7	0	6	0.170285	0.339436
P46734	MAP2K3	15	0	10	-0.256223	0.110202
P46736	BRCC3	5	0	4	0.0696642	0.917203
P46776	RPL27A	16	0	6	-0.3422	0.281075
P46777	RPL5	79	0	15	0.0312411	0.701074
P46778	RPL21	16	0	8	-0.204424	0.583229
P46779	RPL28	32	0	7	-0.174207	0.602733
P46781	RPS9	35	0	12	-0.292065	0.503282
P46782	RPS5	28	0	10	-0.148863	0.255836
P46783	RPS10	40	0	10	-0.114061	0.483987
P46821	MAP1B	5	0	4	0.0964198	0.600071
P46926	GNPDA1	16	0	10	0.103356	0.279458
P46934	NEDD4	9	0	7	0.0514757	0.441202
P46937	YAP1	15	0	9	0.0545241	0.967068
P46939	UTRN	50	0	40	0.0324941	0.846547
P46940	IQGAP1	141	0	62	-0.0156274	0.922886
P46976	GYG1	12	0	6	-0.544657	0.0123818
P46977	STT3A	29	0	16	-0.153832	0.943973
P47224	RABIF	3	0	3	-0.0699237	0.533833
P47712	PLA2G4A	1	0.000130924	1	-0.39953	0.086474
P47755	CAPZA2	18	0	8	-0.022387	0.891677
P47756	CAPZB	29	0	15	0.0303952	0.855791
P47813	EIF1AX	12	0	6	-0.177281	0.3723
P47895	ALDH1A3	34	0	17	-0.00907441	0.761396
P47897	QARS1	84	0	31	-0.0249654	0.608407
P47914	RPL29	15	0	4	-0.319071	0.324199
P47974	ZFP36L2	2	0	2	-0.334652	0.0352757
P47985	UQCRFS1	11	0	8	-0.0894345	0.606891
P48029	SLC6A8	2	0	2	0.00500671	0.852544
P48047	ATP5PO	17	0	10	0.046568	0.530384
P48059	LIMS1	14	0	11	-0.089524	0.339738
P48147	PREP	40	0	25	-0.100578	0.637757
P48163	ME1	24	0	15	-0.0319272	0.321413
P48200	IREB2	5	0	5	-0.0745175	0.535091
P48201	ATP5MC3	1	0.000130924	1	1.67774	1.19101e-05
P48230	TM4SF4	1	0.000130924	1	-0.588752	0.123114
P48378	RFX2	1	0.000130924	1	-0.139064	0.435985
P48382	RFX5	6	0	4	0.10714	0.429671
P48426	PIP4K2A	11	0	9	0.0865341	0.793431
P48436	SOX9	1	0.000130924	1	-0.384505	0.0121927
P48444	ARCN1	38	0	20	-0.191434	0.203078
P48449	LSS	14	0	14	-0.13418	0.491823
P48454	PPP3CC	4	0	3	-0.10383	0.966497
P48506	GCLC	19	0	14	-0.0930132	0.961555
P48507	GCLM	10	0	6	0.0580054	0.987746
P48509	CD151	11	0	6	0.106274	0.276146
P48553	TRAPPC10	7	0	6	-0.022552	0.727125
P48556	PSMD8	18	0	10	-0.0375405	0.524116
P48634	PRRC2A	38	0	30	0.0463324	0.972367
P48637	GSS	26	0	19	0.00483012	0.813836
P48643	CCT5	120	0	38	-0.0820908	0.778695
P48651	PTDSS1	3	0	3	0.180943	0.0481977
P48681	NES	3	0	3	-0.285991	0.319036
P48723	HSPA13	8	0	7	0.210448	0.110283
P48729	CSNK1A1	17	0	11	-0.195471	0.410924
P48730	CSNK1D	11	0	9	-0.148058	0.136384
P48735	IDH2	20	0	12	0.0285076	0.950518
P48739	PITPNB	22	0	14	-0.189325	0.226149
P48960	ADGRE5	12	0	10	0.215824	0.397043
P49005	POLD2	17	0	11	-0.21106	0.126891
P49006	MARCKSL1	11	0	6	-0.103471	0.637002
P49023	PXN	14	0	9	0.126604	0.994699
P49069	CAMLG	3	0	2	-0.107284	0.201831
P49116	NR2C2	5	0	5	-0.0476889	0.526967
P49137	MAPKAPK2	3	0	3	-0.168961	0.374
P49189	ALDH9A1	21	0	13	-0.116705	0.982404
P49207	RPL34	24	0	7	-0.380455	0.497774
P49247	RPIA	4	0	3	0.21095	0.483288
P49257	LMAN1	27	0	14	0.0762204	0.292423
P49281	SLC11A2	1	0.000130924	1	0.154194	0.338093
P49321	NASP	71	0	28	-0.080302	0.693466
P49327	FASN	282	0	100	-0.156882	0.181391
P49336	CDK8	3	0	3	0.0575265	0.495483
P49354	FNTA	8	0	6	0.0717611	0.7641
P49356	FNTB	1	0.000130924	1	0.0803972	0.503396
P49366	DHPS	12	0	8	-0.214062	0.531482
P49368	CCT3	111	0	35	-0.0626475	0.589768
P49406	MRPL19	8	0	5	-0.282281	0.398479
P49411	TUFM	87	0	29	-0.0716858	0.815469
P49419	ALDH7A1	23	0	14	-0.129811	0.596588
[truncated: 5,639 more rows]

## Sheet: KELLY
ac	geneName	AveExpr	t	log2ratio_Niclosamide/DMSO	pValue_Niclosamide/DMSO
P24385	CCND1	2.13696	-25.2342	-4.89979	1.35331e-06
O00418	EEF2K; LOC101930123	2.28498	-29.8611	-4.0523	5.71706e-07
Q9Y3B1	SLMO2; PRELID3B	2.48413	-23.0857	-3.72229	2.13235e-06
P41002	CCNF	2.47842	-12.821	-3.3166	4.20185e-05
Q99538	LGMN	2.70037	-25.4009	-3.0999	1.30849e-06
Q8TEW6	DOK4	2.54033	-11.557	-2.29584	7.05976e-05
Q86YD1-1	PTOV1	2.55598	-9.18948	-2.13816	0.000219165
Q9ULI2-1	RIMKLB	2.66457	-10.119	-2.10073	0.000136482
Q92503-1	SEC14L1	2.83943	-16.4959	-1.89818	1.17915e-05
Q8N0T1	C8orf59	2.94285	-5.53696	-1.86331	0.00240353
P36956	SREBF1	2.50689	-6.79349	-1.82908	0.000936108
Q5VUJ9-1	EFCAB2	2.73854	-4.27935	-1.68043	0.00736893
Q96G75-1	RMND5B	2.88215	-5.85336	-1.59842	0.00186776
O43529	CHST10	2.76481	-5.71533	-1.58818	0.00208224
O15539	RGS5	2.87673	-8.65668	-1.56406	0.000293305
P47974	ZFP36L2	3.07273	-6.63116	-1.54757	0.00104861
Q15773	MLF2	2.88416	-3.86486	-1.5129	0.011175
Q53H80	AKIRIN2	2.84601	-13.4798	-1.48016	3.26742e-05
P01033	TIMP1	2.85589	-3.8142	-1.43714	0.0117794
Q9NZJ0	DTL	2.95103	-5.22102	-1.42773	0.00312639
Q96GU1	PAGE5	3.25072	-3.24158	-1.42234	0.0219651
O60239	SH3BP5	2.67519	-3.44741	-1.41572	0.0174534
P10645	CHGA	2.99682	-20.9006	-1.40964	3.54132e-06
P80370-1	DLK1	2.95611	-9.3196	-1.38206	0.000204583
P05060	CHGB	2.87627	-6.02803	-1.38129	0.00163233
P17275	JUNB	2.83023	-4.66813	-1.37663	0.00509928
P12755	SKI	2.85104	-3.48403	-1.31567	0.0167656
Q9P021	CRIPT	3.04147	-14.2346	-1.31059	2.48378e-05
Q9NVW2	RLIM	3.07346	-4.54447	-1.30417	0.00571983
P17568	NDUFB7	2.91812	-3.58572	-1.29935	0.0150111
P05067-1	APP	2.9167	-4.08516	-1.28275	0.00892796
O94782	USP1	2.98009	-8.49387	-1.27056	0.000321645
Q99551	MTERF; MTERF1	2.76136	-3.0388	-1.26453	0.0277298
Q8WVZ9	KBTBD7	2.94112	-2.60951	-1.24505	0.0463735
P62805	HIST1H4A; HIST1H4F; HIST1H4D; HIST1H4J; HIST2H4A; HIST2H4B; HIST1H4H; HIST1H4C; HIST4H4; HIST1H4E; HIST1H4I; HIST1H4B; HIST1H4K; HIST1H4L	3.37719	-2.79552	-1.236	0.0369863
Q9UJ04	TSPYL4	2.80448	-2.84487	-1.21021	0.0348617
Q16568	CARTPT	3.07233	-8.82512	-1.19954	0.00026704
O94985-1	CLSTN1	2.92168	-6.90071	-1.18236	0.000869568
P30455	HLA-A	2.89503	-6.84574	-1.17228	0.000902957
Q96E52-1	OMA1	2.82589	-2.20268	-1.16622	0.0772692
Q9Y2U9-1	KLHDC2	3.08548	-5.77795	-1.16076	0.00198155
Q68CQ7-1	GLT8D1	3.0149	-2.45705	-1.15449	0.0560187
Q96IK1	BOD1	3.02408	-13.6629	-1.14057	3.05306e-05
Q9H0C5	BTBD1	2.90215	-7.56768	-1.13289	0.000561045
P98179	RBM3	3.1641	-4.65024	-1.1267	0.00518405
Q7LC44	ARC	3.04529	-3.68648	-1.11733	0.0134755
Q12834	CDC20	3.11067	-6.48068	-1.1142	0.00116734
Q9UJA3	MCM8	3.01007	-3.21449	-1.1128	0.0226512
O14713-1	ITGB1BP1	2.84528	-3.92965	-1.1116	0.0104532
Q96K12	FAR2	2.86399	-2.97325	-1.10506	0.029941
Q9P2N7	KLHL13	2.87808	-5.596	-1.10391	0.00229115
Q7Z5Y7	KCTD20	2.87884	-3.13414	-1.07231	0.0248319
O95271	TNKS	2.9082	-10.8812	-1.07193	9.5271e-05
O00767	SCD	3.21162	-3.06009	-1.04962	0.0270514
Q9Y6N7	ROBO1	3.08516	-2.85124	-1.04839	0.0345977
Q93045	STMN2	2.91328	-3.3375	-1.04696	0.0197168
O75618	DEDD	2.95678	-3.20792	-1.0367	0.0228212
Q4U2R6	MRPL51	2.01416	-1.06917	-1.03439	0.332539
Q49AN0-1	CRY2	3.05025	-3.03834	-1.02504	0.0277449
P58340-1	MLF1	3.02507	-6.56678	-1.02197	0.00109759
Q8IZ02	LRRC34	2.90089	-2.57929	-1.02078	0.0481314
Q99501	GAS2L1	3.0873	-2.57981	-1.01865	0.0481004
Q9HB96	FANCE	3.27542	-2.80054	-1.00165	0.0367637
Q6UWJ1	TMCO3	3.10298	-3.07511	-0.990415	0.0265839
Q58EX7	PLEKHG4	3.09828	-3.34199	-0.98742	0.019618
Q9H4H8	FAM83D	2.9668	-3.76691	-0.979913	0.0123773
Q9NQX5	NPDC1	3.04507	-6.22351	-0.974236	0.00140892
Q8N9B5-1	JMY	2.96843	-2.17084	-0.96295	0.0804831
Q15834	CCDC85B	3.06374	-3.18458	-0.958258	0.0234368
Q96F45	ZNF503	3.0254	-6.03323	-0.955367	0.00162586
Q96AE7	TTC17	3.03095	-3.09731	-0.935237	0.0259092
Q96JK2	DCAF5	3.00608	-2.85401	-0.930953	0.0344833
O95997	PTTG1	2.93089	-5.66736	-0.923036	0.00216342
Q9UKT7	FBXL3	2.92424	-3.73794	-0.915128	0.0127606
Q92481-1	TFAP2B	2.72717	-2.87425	-0.911478	0.0336614
Q9HAW4	CLSPN	3.01435	-6.8381	-0.909137	0.000907719
Q75VX8	FAM59B; GAREML; GAREM2	3.23492	-2.53774	-0.896196	0.0506677
O75147	OBSL1	2.98001	-10.0632	-0.895287	0.00014026
O75380	NDUFS6	3.15446	-4.82461	-0.890599	0.00442245
P10619	CTSA	3.32917	-3.06653	-0.885939	0.0268498
Q92802-1	N4BP2L2	3.01413	-4.05074	-0.885897	0.00924224
P18075	BMP7	3.20174	-2.7504	-0.881392	0.0390542
Q9NRN9	METTL5	3.29898	-2.3629	-0.879912	0.0630461
Q9H3Z4	DNAJC5	3.19443	-2.54441	-0.878867	0.0502513
Q9NYV6	RRN3	2.99619	-5.60735	-0.872527	0.00227025
A5PL33	KRBA1	3.05742	-4.01671	-0.870999	0.00956548
Q5SXM2	SNAPC4	2.99383	-2.45562	-0.867479	0.0561187
Q9UGL1-2	KDM5B	3.00785	-12.2056	-0.862887	5.37541e-05
Q96FE7-1	PIK3IP1	3.00186	-2.26168	-0.860346	0.0716694
Q96T21	SECISBP2	3.0403	-2.87215	-0.859241	0.0337455
P35790	CHKA	3.03185	-2.25	-0.840413	0.0727433
Q5T653	MRPL2	3.13827	-3.2873	-0.836532	0.0208593
Q9NP50-1	FAM60A; SINHCAF	3.08341	-2.97056	-0.834208	0.0300358
Q9UM11-1	FZR1	3.08902	-2.61513	-0.828728	0.0460543
A4D1E9-1	GTPBP10	3.15117	-1.81404	-0.823382	0.127712
P51784	USP11	3.10792	-4.58524	-0.817593	0.00550607
P41567	EIF1	3.19901	-5.13609	-0.817122	0.00336206
Q9UJK0	TSR3	3.03212	-4.05072	-0.802844	0.00924247
P61769	B2M	2.98864	-2.1545	-0.801739	0.0821859
P81274	GPSM2	2.92582	-2.52745	-0.799665	0.0513186
Q93073-1	SECISBP2L	2.93219	-3.14018	-0.796698	0.0246601
P62879	GNB2	3.07072	-2.66476	-0.79485	0.0433379
Q8N2A8	PLD6	2.8172	-2.39619	-0.78926	0.0604582
Q13610	PWP1	3.15857	-2.97385	-0.785359	0.02992
O95149	SNUPN	3.09895	-1.96821	-0.784807	0.104514
Q8NG48-1	LINS; LINS1	3.04426	-1.82514	-0.784605	0.125878
Q24JP5	TMEM132A	3.28353	-1.84154	-0.780966	0.123218
P19021-1	PAM	3.12739	-2.7962	-0.774886	0.0369563
Q8NEM7	FAM48A; SUPT20H	3.04168	-2.0699	-0.767575	0.0916346
Q96T92	INSM2	3.0117	-3.93201	-0.763432	0.0104279
Q86YT6	MIB1	2.99165	-3.50336	-0.763104	0.016415
Q06481	APLP2	2.94619	-7.22458	-0.761505	0.000699898
Q12899	TRIM26	3.04675	-4.82736	-0.760832	0.00441149
O60507	TPST1	3.03182	-5.22474	-0.758205	0.00311652
P24928	POLR2A	3.0952	-9.51023	-0.754522	0.000185241
Q14592	ZNF460	2.81819	-1.32179	-0.754271	0.241924
Q13123	IK	3.07367	-2.04206	-0.754217	0.0949873
A6NNL5	C15orf61	3.09124	-2.80976	-0.754157	0.036359
Q9NQZ6-1	ZC4H2	3.10473	-3.45886	-0.753261	0.0172349
Q6DN90-1	IQSEC1	3.2481	-1.86411	-0.750336	0.119651
Q9GZU1	MCOLN1	3.06402	-1.58547	-0.746935	0.17204
Q9P0W5-1	SCHIP1; IQCJ-SCHIP1	3.04255	-3.6655	-0.741914	0.01378
Q96RR1-1	C10orf2; TWNK	3.07122	-2.40325	-0.741129	0.0599246
Q9BRK5-1	SDF4	3.02933	-7.91189	-0.738137	0.000453249
P20674	COX5A	3.07091	-1.9171	-0.735607	0.111682
Q8N490-2	PNKD	3.21747	-2.65108	-0.732181	0.0440688
Q96RU3-2	FNBP1	2.97856	-2.68597	-0.729728	0.0422309
O95298-1	NDUFC2; NDUFC2-KCTD14	3.20573	-2.13704	-0.72773	0.084049
Q9NW82	WDR70	3.09157	-2.26138	-0.727436	0.0716971
Q9UKT4	FBXO5	3.00925	-4.67999	-0.720592	0.00504395
O94955	RHOBTB3	3.05042	-6.64778	-0.714575	0.00103639
Q9BXS4	TMEM59	3.26863	-1.97634	-0.713828	0.103418
Q8NCH0	CHST14	3.05817	-5.37821	-0.710622	0.00273908
Q9NUS5	AP5S1	3.13241	-2.16674	-0.708082	0.0809063
Q3T8J9-1	GON4L	3.15501	-4.03449	-0.707739	0.00939501
Q9H5Q4	TFB2M	3.09533	-2.99936	-0.707126	0.0290376
Q9Y6M0-1	PRSS21	3.06206	-1.92221	-0.705749	0.110943
Q9ULA0	DNPEP	2.99654	-1.92778	-0.703451	0.110144
Q9BWP8	COLEC11	3.10536	-1.69572	-0.700659	0.149016
Q53GL0-1	PLEKHO1	3.04182	-1.92926	-0.698976	0.109932
Q8TEY7-1	USP33	2.91397	-9.23113	-0.698755	0.000214367
Q69YQ0-1	SPECC1L	3.15224	-5.83867	-0.698536	0.00188931
P30154	PPP2R1B	2.99266	-2.37457	-0.695655	0.0621253
Q9BRV8	SIKE1	3.13327	-7.03306	-0.693205	0.00079495
Q9H3F6-1	KCTD10	3.01686	-4.64599	-0.689187	0.0052044
O95466-2	FMNL1	3.15894	-3.99506	-0.688698	0.00977793
Q66K74	MAP1S	3.03777	-1.89474	-0.686971	0.114976
Q8N3Z3-1	GTPBP8	3.13114	-3.05521	-0.68656	0.0272055
P51948-1	MNAT1	3.06269	-2.77041	-0.685843	0.0381221
P56524	HDAC4	3.013	-2.41836	-0.684279	0.0587989
Q9UK32	RPS6KA6	3.20999	-1.87753	-0.677512	0.117579
Q9Y2X0-1	MED16	3.16956	-3.14912	-0.675564	0.0244082
P12757	SKIL	3.04476	-1.7259	-0.673188	0.143265
Q16667	CDKN3	3.12107	-2.07686	-0.672677	0.0908151
Q7Z3D6	C14orf159; DGLUCY	3.07222	-1.42075	-0.672653	0.213019
P01034	CST3	3.15389	-3.71966	-0.672346	0.0130096
Q8NCY6	MSANTD4	3.05551	-4.46121	-0.666393	0.00618692
Q6IQ49-1	SDE2	2.27954	-0.632938	-0.6644	0.55382
Q9NVR0	KLHL11	3.04926	-4.89018	-0.663329	0.00417022
Q96MM7	HS6ST2	3.21697	-2.17045	-0.661068	0.0805227
Q8IZT6-1	ASPM	2.95585	-5.74036	-0.658171	0.00204128
Q8ND90	PNMA1	3.02873	-6.14312	-0.657979	0.00149616
P51148	RAB5C	3.07693	-2.00947	-0.654044	0.0990746
O15514	POLR2D	3.24309	-2.50723	-0.651771	0.0526227
Q9BZX2-1	UCK2	2.98815	-4.31039	-0.65115	0.00714994
Q9P2G9	KLHL8	2.98943	-5.24214	-0.650549	0.00307081
P52848-1	NDST1	3.17012	-1.63543	-0.646942	0.161201
Q9NYA4	MTMR4	3.09984	-3.75747	-0.64692	0.0125008
Q6PCD5	RFWD3	2.9954	-5.64383	-0.646403	0.0022046
Q96FE5	LINGO1	3.11852	-1.65336	-0.644444	0.157478
O75319-1	DUSP11	3.05295	-1.59195	-0.640525	0.170594
Q12882-1	DPYD	3.11836	-2.17919	-0.636901	0.0796271
P16035	TIMP2	3.02002	-3.79154	-0.636288	0.0120617
P35555	FBN1	2.97818	-2.29377	-0.636184	0.0688061
Q96GE4	CEP95	3.0353	-2.35361	-0.634493	0.063789
Q96CD2-1	PPCDC	3.16497	-2.10906	-0.633502	0.0871263
P55210-1	CASP7	3.3699	-1.23015	-0.631139	0.27187
Q9UBZ4	APEX2	2.98942	-2.23781	-0.631011	0.0738815
O95273-1	CCNDBP1	2.91793	-0.930598	-0.62343	0.393608
O95229	ZWINT	2.96157	-3.21286	-0.622742	0.0226932
P11802	CDK4	3.04266	-1.69909	-0.619311	0.148362
Q99081-1	TCF12	3.16644	-2.37053	-0.618306	0.0624423
Q02224	CENPE	3.02546	-6.61717	-0.615082	0.00105903
O95258	SLC25A14	3.10591	-3.49242	-0.614693	0.0166124
Q96QD9-1	FYTTD1	3.11612	-3.50052	-0.609258	0.016466
O14529	CUX2	3.07056	-2.95202	-0.608694	0.0306988
Q9BY42	RTFDC1	3.14734	-3.25779	-0.608403	0.0215657
Q6SJ93-1	FAM111B	3.04927	-2.81912	-0.606276	0.0359531
Q9BT88	SYT11	2.93791	-1.71364	-0.60533	0.145574
Q9NY93	DDX56	3.11	-2.60644	-0.605255	0.0465486
Q53HL2	CDCA8	3.12031	-5.43165	-0.604742	0.00262035
Q14240-1	EIF4A2	3.27146	-2.1943	-0.604503	0.0781017
Q99759	MAP3K3	3.4126	-1.76239	-0.603855	0.136607
Q93086-1	P2RX5	2.94966	-3.18734	-0.602583	0.023363
Q8NCD3-1	HJURP	3.15521	-1.68878	-0.602318	0.150371
Q9BW71-1	HIRIP3	3.17277	-3.26325	-0.602038	0.0214329
Q9C0C7-1	AMBRA1	3.11829	-3.17605	-0.598391	0.0236666
Q9Y3E5	PTRH2	2.95493	-1.10176	-0.597478	0.319388
Q9NR48	ASH1L	3.06784	-1.59107	-0.597171	0.17079
Q96AA8-1	JAKMIP2	3.11568	-1.77817	-0.596252	0.133825
P35251-1	RFC1	3.05217	-1.50724	-0.595734	0.190454
Q9BQI3-1	EIF2AK1	2.98543	-4.99267	-0.595151	0.00380864
Q96FC9-2	DDX11	3.0304	-3.03295	-0.595148	0.0279198
Q7LBR1	CHMP1B	3.06213	-1.82322	-0.59324	0.126194
Q9Y546	LRRC42	3.15602	-4.98946	-0.592066	0.0038194
Q5TAX3	ZCCHC11	3.26661	-1.77913	-0.591939	0.133657
P98168	ZXDA	2.73359	-1.23324	-0.590881	0.270809
Q9NVC6	MED17	3.14984	-2.19115	-0.586654	0.0784174
O43768	ENSA	3.25029	-2.15202	-0.586561	0.0824483
P49798	RGS4	2.92427	-1.43025	-0.584968	0.210421
Q9UK41-1	VPS28	2.96824	-1.76042	-0.584226	0.136958
Q92782-2	DPF1	3.24067	-2.39284	-0.583843	0.0607137
Q15554-3	TERF2	3.05035	-1.68387	-0.582986	0.151336
Q9HC77	CENPJ	2.91682	-2.18642	-0.578801	0.0788936
Q8IWF2	FOXRED2	3.09012	-4.13436	-0.57731	0.0084998
Q96RL7	VPS13A	3.14627	-2.83453	-0.576473	0.0352954
Q15070-1	OXA1L	3.11734	-2.40856	-0.574213	0.0595258
Q8IWK6	GPR125; ADGRA3	3.23108	-1.64242	-0.570788	0.159738
P04114	APOB	3.04819	-4.30658	-0.570785	0.00717636
Q9UGP4	LIMD1	3.14678	-1.96097	-0.569359	0.1055
Q92896	GLG1	3.15229	-3.82369	-0.568443	0.0116633
P60604	UBE2G2	3.06417	-1.44965	-0.566584	0.205211
O60333-2	KIF1B	3.04306	-3.41784	-0.566034	0.018032
P09172	DBH	2.9375	-2.23406	-0.565844	0.0742352
Q7Z628	NET1	3.05253	-2.17817	-0.563754	0.0797305
Q9P2K8-1	EIF2AK4	2.99197	-2.18528	-0.562358	0.079008
Q3SY69-1	ALDH1L2	3.24577	-2.1894	-0.561177	0.078593
Q9NPL8	TIMMDC1	3.04275	-2.60638	-0.557657	0.046552
P01137	TGFB1	3.10074	-4.4093	-0.557291	0.00650045
Q9UFF9	CNOT8	3.15537	-2.77356	-0.556881	0.0379775
Q9H2F5-2	EPC1	3.18133	-2.0945	-0.555738	0.0887752
Q9H9P5-1	UNKL	3.06753	-1.50485	-0.555525	0.191047
Q99435-1	NELL2	3.05495	-4.98168	-0.554389	0.00384559
Q9GZL7	WDR12	3.21813	-1.87469	-0.552976	0.118014
Q9NYR9-1	NKIRAS2	3.21588	-1.72337	-0.551502	0.143738
Q53EZ4-1	CEP55	3.07109	-3.58093	-0.549982	0.0150889
Q9UDW1	UQCR10	3.11278	-3.619	-0.546251	0.014483
Q6W2J9-1	BCOR	3.12888	-4.91464	-0.545353	0.00408043
O75164-1	KDM4A	3.09928	-4.54287	-0.544792	0.00572844
Q13569	TDG	3.01387	-1.54352	-0.541632	0.181688
Q96Q89-3	KIF20B	3.10318	-7.2025	-0.541551	0.000710148
Q96CX6	LRRC58	3.14886	-2.94982	-0.540464	0.0307785
O15054	KDM6B	3.09823	-2.6311	-0.539761	0.0451602
Q9UBS4	DNAJB11	3.15076	-1.42799	-0.538352	0.211038
Q96R06	SPAG5	3.04807	-2.78869	-0.537622	0.0372915
Q4KMQ1	TPRN	3.07944	-3.46682	-0.53286	0.0170849
O96000	NDUFB10	3.26104	-1.48381	-0.532789	0.196332
P13056-1	NR2C1	3.1702	-2.2393	-0.53264	0.0737416
Q96SB4-3	SRPK1	3.04809	-2.36105	-0.531895	0.0631931
O75718	CRTAP	3.09766	-1.32143	-0.531301	0.242036
O14965	AURKA	3.2915	-1.51699	-0.530998	0.188059
O15392	BIRC5	3.09509	-5.29102	-0.530935	0.0029465
Q9Y217-1	MTMR6	3.03616	-3.93778	-0.530805	0.0103663
Q96IT1-1	ZNF496	3.13529	-3.44351	-0.529265	0.0175284
O75197	LRP5	3.08214	-1.29555	-0.528272	0.250177
O43379-1	WDR62	3.05888	-1.22732	-0.527759	0.272847
Q9H116	GZF1	3.0181	-1.88193	-0.522637	0.116908
Q8N158	GPC2	3.07216	-1.13169	-0.522376	0.307705
O75362	ZNF217	3.066	-2.963	-0.518201	0.0303042
Q969G6	RFK	2.99517	-1.78578	-0.515635	0.132504
Q9NNW5	WDR6	3.0839	-1.44365	-0.514966	0.206809
Q8N2Z9	APITD1; CENPS; APITD1-CORT; CENPS-CORT	3.10645	-1.30741	-0.514899	0.246416
Q8TCU4-1	ALMS1	3.07997	-4.17277	-0.51438	0.00818192
Q92871	PMM1	3.22571	-2.12371	-0.512394	0.0855006
O60573	EIF4E2	2.69392	-0.71747	-0.51084	0.504313
P43363	MAGEA10	3.17458	-2.16726	-0.510795	0.0808532
Q5T7W7	TSTD2	3.05462	-2.94835	-0.5104	0.0308317
B2RTY4	MYO9A	3.30757	-1.52156	-0.509322	0.186947
Q86UP3-5	ZFHX4	3.19429	-1.92789	-0.505737	0.110128
O95864	FADS2	3.0352	-1.72819	-0.505482	0.142837
Q9BVV6-1	KIAA0586	3.00481	-1.92238	-0.505164	0.110919
Q9Y6C2	EMILIN1	3.00206	-2.24821	-0.503871	0.072909
Q96EX3	WDR34	3.18089	-3.48315	-0.503389	0.0167818
Q15543	TAF13	3.14784	-2.20147	-0.503334	0.0773888
Q53G59-1	KLHL12	3.05845	-3.21229	-0.500306	0.022708
Q719H9	KCTD1	3.31805	-1.24072	-0.499524	0.268251
P0DJJ0	SRGAP2C	3.15859	-1.33559	-0.499104	0.237686
Q8N201	INTS1	3.10359	-3.75002	-0.498578	0.0125992
Q14134-1	TRIM29	3.15189	-2.12686	-0.497538	0.0851554
Q9UL40-1	ZNF346	3.11269	-1.03041	-0.496473	0.34877
P62280	RPS11	3.28824	-3.55328	-0.495876	0.0155471
Q6P1K2	PMF1; PMF1-BGLAP	3.37613	-1.234	-0.494197	0.270548
O95801	TTC4	3.18374	-1.92568	-0.493354	0.110445
Q8NB46	ANKRD52	3.14061	-2.77634	-0.492464	0.0378505
Q9UG01	IFT172	3.13627	-5.08164	-0.490455	0.00352402
Q8N2W9	PIAS4	3.28654	-2.13617	-0.490184	0.0841422
Q9NZ71-2	RTEL1	3.12671	-1.62659	-0.490109	0.163069
O15116	LSM1	3.14456	-2.2138	-0.489356	0.07618
P02792	FTL	3.28704	-5.22691	-0.488547	0.00311076
Q8TDJ6-1	DMXL2	2.9758	-1.82597	-0.48793	0.125743
Q9C0D0	PHACTR1	3.34788	-1.6172	-0.487135	0.165076
Q9Y222-1	DMTF1	3.10931	-1.39733	-0.485488	0.219551
Q9NX58	LYAR	3.27344	-1.74889	-0.485149	0.139032
P48552	NRIP1	2.98207	-1.61205	-0.484948	0.166186
P63167	DYNLL1	3.41915	-0.930673	-0.483114	0.393573
Q9NYJ7	DLL3	2.85773	-1.20337	-0.482938	0.28123
Q6I9Y2	THOC7	3.11267	-1.28624	-0.482382	0.253166
Q6P3W2	DNAJC24	3.05195	-3.91941	-0.479953	0.0105636
Q9H0H3	KLHL25	3.15425	-2.08535	-0.479621	0.0898276
Q9UPV0	CEP164	3.12089	-1.24173	-0.47911	0.267909
Q53HC9	TSSC1; EIPR1	3.23998	-2.11572	-0.478002	0.0863833
Q9NZ09-1	UBAP1	2.93707	-1.02375	-0.474362	0.351626
Q8TCF1-1	ZFAND1	3.15091	-1.38744	-0.474289	0.222369
Q5VTB9-3	RNF220	3.23861	-1.649	-0.474192	0.158375
Q96GD4	AURKB	3.02718	-1.44486	-0.473594	0.206484
Q9UPP1	PHF8	3.08516	-2.02285	-0.473001	0.0973744
Q6ZU67-1	BEND4	3.26586	-1.29189	-0.470443	0.251345
Q15652	JMJD1C	3.05032	-1.63919	-0.469588	0.160413
Q9BSW2-2	EFCAB4B; CRACR2A	3.03989	-2.04116	-0.467485	0.0950975
Q7L2K0-1	C16orf59; TEDC2	3.12566	-3.13243	-0.466853	0.0248809
Q9UBC3	DNMT3B	3.20283	-1.57609	-0.465553	0.174154
Q96JH8-1	RADIL	3.09642	-1.00547	-0.464952	0.359562
Q9UIF8-1	BAZ2B	3.26557	-1.87872	-0.46483	0.117397
Q5JTJ3-1	COA6	3.10736	-1.2203	-0.464241	0.275281
Q14739	LBR	3.18862	-1.18247	-0.463281	0.288736
Q6PUV4	CPLX2	3.01991	-0.95827	-0.463254	0.380734
Q14241	TCEB3; ELOA	3.19983	-1.32068	-0.46022	0.242267
Q6GMV3	PTRHD1	3.08585	-1.79995	-0.459908	0.130078
Q8IWZ8-1	SUGP1	3.09882	-3.14703	-0.459468	0.0244667
P04637	TP53	3.11974	-2.94735	-0.458745	0.0308681
P67775	PPP2CA	3.12611	-1.72321	-0.457434	0.143767
P51530	DNA2	3.12176	-3.08358	-0.457167	0.0263242
Q8N5N7	MRPL50	3.49656	-1.01541	-0.45617	0.355227
P39060-1	COL18A1	3.25274	-1.26888	-0.456032	0.258824
Q9Y6K1	DNMT3A	3.28068	-2.54831	-0.455832	0.050009
Q5T481	RBM20	3.15178	-1.10286	-0.453076	0.318953
Q96DE0	NUDT16	3.13839	-1.42244	-0.451041	0.212555
Q9H9E3-1	COG4	2.57267	-0.716011	-0.450816	0.505141
Q9Y2F5	KIAA0947; ICE1	3.17332	-1.9723	-0.450322	0.103962
Q7Z460-3	CLASP1	3.03728	-2.21938	-0.449856	0.0756387
Q9P2D0	IBTK	3.10844	-1.10075	-0.449536	0.319788
P40855-1	PEX19	3.21539	-2.26308	-0.449152	0.0715417
P82663	MRPS25	3.26528	-1.07927	-0.449088	0.328415
O95235	KIF20A	3.09987	-8.17471	-0.44733	0.000387182
P12109	COL6A1	3.06165	-1.79987	-0.44631	0.130092
O75094-1	SLIT3	3.04908	-3.39651	-0.443703	0.018463
Q14807	KIF22	3.07152	-2.42137	-0.443699	0.0585768
Q9NP66	HMG20A	3.10472	-1.87338	-0.442918	0.118215
Q9Y5S9	RBM8A; LOC101060541	3.11345	-1.12808	-0.442205	0.309094
Q9NRX4	PHPT1	3.2233	-1.82815	-0.441235	0.125386
Q8NBX0	SCCPDH	3.07382	-1.44897	-0.440234	0.205392
P42575-1	CASP2	3.06005	-2.41815	-0.439373	0.0588143
Q5THK1-1	PRR14L	3.15711	-6.71393	-0.439232	0.000989376
Q6ZV73-1	FGD6	3.09119	-1.43665	-0.438488	0.208688
P11310-1	ACADM	3.17368	-1.99768	-0.437811	0.100599
Q712K3	UBE2R2	3.17045	-2.22694	-0.437761	0.0749129
Q6PH81-1	C16orf87	3.10688	-1.52135	-0.435491	0.186998
Q8TAC2-1	JOSD2	3.23399	-1.17773	-0.434453	0.29046
P06865	HEXA	3.09718	-2.03913	-0.434087	0.0953475
Q9UBI4-1	STOML1	3.31286	-1.29154	-0.433912	0.25146
Q9P2G1	ANKIB1	3.1193	-1.89642	-0.433721	0.114726
P82914	MRPS15	3.155	-1.7219	-0.433671	0.144013
Q9Y2K6	USP20	3.24837	-1.78592	-0.433473	0.13248
Q9BT23	LIMD2	3.16755	-5.49041	-0.433394	0.00249668
Q5VVJ2	MYSM1	3.23324	-1.92994	-0.432859	0.109835
P00374	DHFR; DHFRP1	3.11028	-3.78023	-0.432147	0.0122055
Q6TFL4-1	KLHL24	2.78932	-1.51597	-0.43011	0.188309
P31321	PRKAR1B	3.09416	-1.84513	-0.429803	0.122643
Q99986	VRK1	3.2132	-1.09924	-0.429043	0.320389
P49454	CENPF	3.05849	-10.4615	-0.428708	0.000115777
Q96CG3	TIFA	3.06557	-1.2228	-0.428513	0.274412
Q8NBJ4	GOLM1	3.09888	-2.50321	-0.428476	0.0528865
O43674-1	NDUFB5	3.02982	-1.38158	-0.428411	0.224051
Q9UL63-1	MKLN1	3.03201	-3.66297	-0.427704	0.0138172
Q7Z5U6	WDR53	3.01527	-1.61133	-0.427463	0.166343
Q9UHY1	NRBP1	3.06177	-1.67099	-0.427126	0.153898
P78560	CRADD	3.2352	-1.53106	-0.426405	0.184654
Q9P0W2	HMG20B	3.24769	-1.12189	-0.426393	0.311489
Q8NCN2	ZBTB34	3.35189	-1.0689	-0.426301	0.332649
Q3V5L5-1	MGAT5B	3.08092	-1.43213	-0.425675	0.209911
Q9H6Y2	WDR55	3.08452	-2.54971	-0.425479	0.0499227
Q9HCG7	GBA2	3.1465	-1.00953	-0.423973	0.357788
Q6UWY0	ARSK	3.16551	-3.32162	-0.423736	0.0200703
Q9H0K1	SIK2	3.13651	-1.96767	-0.423563	0.104587
Q5T0D9	TPRG1L	3.17748	-2.33794	-0.423377	0.0650635
Q9ULU8-3	CADPS	3.12329	-2.02051	-0.423312	0.0976699
Q8TDR2	STK35	3.15424	-1.42789	-0.422849	0.211063
Q9P031	CCDC59	3.21675	-1.742	-0.421003	0.140287
Q14207	NPAT	2.91823	-1.43665	-0.419926	0.208689
Q9NWZ5-1	UCKL1	3.04186	-2.04658	-0.418255	0.0944345
Q9NV79	PCMTD2	3.26763	-1.02577	-0.418254	0.350759
Q9HBU6-1	ETNK1	3.06407	-1.94555	-0.418245	0.107632
Q7L5Y9-1	MAEA	3.08711	-2.60513	-0.41817	0.0466235
Q05932-1	FPGS	3.08305	-5.54294	-0.417674	0.00239186
Q9BT30	ALKBH7	3.05317	-1.70181	-0.416898	0.147837
Q9NXV2	KCTD5	2.94624	-1.17238	-0.416174	0.292423
Q7Z7G8-1	VPS13B	3.05012	-2.43629	-0.415972	0.0574921
Q9NZM5	GLTSCR2; NOP53	3.16972	-3.37981	-0.415809	0.0188083
O75554	WBP4	3.13342	-1.18397	-0.415284	0.28819
Q9NPJ3-1	ACOT13	3.05937	-1.07995	-0.415039	0.328137
Q8WUB2	FAM216A	3.0715	-1.28609	-0.413697	0.253212
O43542	XRCC3	3.17204	-1.60968	-0.413068	0.166701
Q92530	PSMF1	3.26936	-3.40557	-0.412823	0.0182785
Q8NDV1-1	ST6GALNAC3	3.14498	-2.08973	-0.411822	0.0893221
Q9Y5K6	CD2AP	3.16136	-2.38071	-0.409045	0.0616468
P09105	HBQ1	3.0517	-1.14335	-0.408633	0.303258
Q02252	ALDH6A1	3.07942	-1.26585	-0.408167	0.259827
Q13257-1	MAD2L1	3.26062	-1.50518	-0.40793	0.190964
Q9BRX9	WDR83	2.94657	-1.1628	-0.407769	0.295958
Q86UE6	LRRTM1	3.29019	-1.03962	-0.406192	0.344853
Q9UJ83	HACL1	3.26421	-2.79754	-0.405668	0.0368968
Q8NEM2	SHCBP1	3.1073	-3.44229	-0.405479	0.0175519
Q9BW83-1	IFT27	3.14706	-1.65872	-0.405014	0.15638
Q674X7-1	KAZN	3.17687	-2.77958	-0.403301	0.0377028
Q96JJ3	ELMO2	3.27345	-1.524	-0.403267	0.186356
P51587	BRCA2	3.06073	-2.38807	-0.402301	0.0610788
Q3YEC7-1	RABL6	3.03375	-1.49194	-0.401959	0.194274
P49674	CSNK1E; LOC400927-CSNK1E	3.14442	-1.11809	-0.400447	0.312968
O15198-1	SMAD9	3.14005	-2.52483	-0.400293	0.0514855
Q9UID6	ZNF639	3.18937	-3.71794	-0.399209	0.0130333
Q96L73-1	NSD1	3.1563	-1.51523	-0.398684	0.18849
Q53GG5-2	PDLIM3	3.1626	-1.05613	-0.398408	0.337927
Q9NS87	KIF15	3.17333	-4.96362	-0.397771	0.0039073
A1XBS5	FAM92A1; FAM92A	3.16006	-2.44182	-0.396509	0.057096
P62829	RPL23	3.03447	-1.31668	-0.396343	0.243512
Q8TDY2-1	RB1CC1	3.04572	-2.2073	-0.395675	0.0768148
Q6PIJ6-1	FBXO38	3.04638	-1.28154	-0.395452	0.254685
Q96DT7	ZBTB10	3.12789	-2.1643	-0.394671	0.0811599
Q14376	GALE	3.04587	-1.30829	-0.394253	0.246137
O15460-2	P4HA2	3.1561	-2.20071	-0.392883	0.0774645
Q9NPF5	DMAP1	3.16173	-1.94921	-0.391958	0.107122
Q86XS8	RNF130	3.25849	-1.53719	-0.391449	0.183189
Q13642-1	FHL1	3.27626	-0.689439	-0.391394	0.520385
Q8TB61	SLC35B2	3.41443	-1.8473	-0.39018	0.122297
A6NHR9-1	SMCHD1	3.12394	-1.61576	-0.388914	0.165386
O43299	AP5Z1	3.14067	-2.27911	-0.388532	0.0700986
Q9BRQ0	PYGO2	3.07028	-2.13671	-0.388372	0.0840842
Q14145	KEAP1	3.11384	-1.80576	-0.38817	0.129097
Q6PCE3	PGM2L1	3.14865	-2.18163	-0.387678	0.0793785
Q53GT1	KLHL22	3.16334	-1.38616	-0.38541	0.222734
Q9H257-1	CARD9	3.21872	-1.24056	-0.385276	0.268305
Q6IQ21	ZNF770	3.01197	-1.00341	-0.385133	0.360465
Q9BVN2	RUSC1	3.10629	-1.77605	-0.385133	0.134195
Q4VC05-2	BCL7A	3.19128	-2.28655	-0.383984	0.0694397
Q13627-2	DYRK1A	3.18481	-2.03475	-0.38263	0.0958889
Q9HCK1	ZDBF2	3.14081	-2.93156	-0.382547	0.031449
Q15025	TNIP1	3.15287	-4.27989	-0.382456	0.00736501
P10909-1	CLU	3.15399	-1.69531	-0.381573	0.149094
Q5W0Q7	USPL1	2.84308	-2.08672	-0.37998	0.0896692
P85037-1	FOXK1	3.16564	-3.05427	-0.379769	0.0272351
Q9P000-1	COMMD9	3.13239	-4.6051	-0.379597	0.00540529
Q5MNZ6	WDR45B; WDR45L	3.21255	-1.49213	-0.379567	0.194225
Q96HU1-1	SGSM3	3.12994	-1.06877	-0.378426	0.332702
Q9NW81	ATP5SL; DMAC2	3.18952	-2.07023	-0.378188	0.0915953
A6NKG5	RTL1	3.16972	-3.7365	-0.377599	0.0127802
P52292	KPNA2	3.09504	-3.96078	-0.377509	0.0101253
Q9BY84	DUSP16	3.07188	-1.73577	-0.377057	0.141432
P04818	TYMS	3.33152	-1.505	-0.37612	0.191008
Q9H8H2	DDX31	2.77751	-0.728057	-0.37593	0.498333
A8CG34-1	POM121C	2.90446	-0.932696	-0.375085	0.39262
Q15047	SETDB1	3.14146	-2.04192	-0.374766	0.0950044
Q6ICG6-1	KIAA0930	3.08864	-1.66001	-0.374544	0.156118
Q8N9R8-1	SCAI	3.20668	-1.64908	-0.374225	0.158358
Q9UKB1-3	FBXW11	3.12647	-1.63751	-0.374215	0.160766
Q96LB3-1	IFT74	3.16107	-1.0646	-0.373938	0.33442
Q9UHB7-1	AFF4	3.17532	-3.21045	-0.373231	0.0227554
Q8IXQ5	KLHL7	3.13028	-2.58079	-0.373042	0.0480425
Q155Q3-1	DIXDC1	2.95996	-2.55184	-0.372781	0.0497914
Q9ULT8	HECTD1	3.14516	-4.3769	-0.372718	0.00670541
O75143-1	ATG13	3.08665	-2.60778	-0.371799	0.0464721
Q86XI2-1	NCAPG2	3.18847	-1.63437	-0.371207	0.161425
O43251-8	RBFOX2	3.23659	-0.899723	-0.371067	0.408377
Q15631-1	TSN	3.1904	-1.18683	-0.37075	0.287157
O43663-1	PRC1	3.18181	-3.72631	-0.370002	0.0129184
Q96S38	RPS6KC1	2.97427	-1.34585	-0.369714	0.234578
Q96T58	SPEN	3.19312	-3.95642	-0.369216	0.0101705
O00287	RFXAP	3.10594	-1.58283	-0.369164	0.172631
Q08170	SRSF4	2.88822	-1.06885	-0.368164	0.332669
Q08117	AES	2.97715	-1.13416	-0.367651	0.30676
O00422	SAP18	3.07774	-1.4915	-0.366136	0.194384
P27540	ARNT	3.03026	-1.55024	-0.365968	0.180109
Q96A58	RERG	3.0908	-1.66658	-0.365944	0.154786
O75063	FAM20B	3.12835	-2.56867	-0.365562	0.0487663
Q9BY49-1	PECR	3.36031	-1.09226	-0.364998	0.323175
P10253	GAA	3.15742	-2.5882	-0.364872	0.0476053
Q9NP73-1	ALG13	2.92028	-1.62174	-0.364055	0.164103
Q15043	SLC39A14	3.205	-1.18431	-0.363751	0.288067
Q8IWW6-1	ARHGAP12	3.12421	-1.5683	-0.362942	0.175926
Q14676	MDC1	3.10513	-4.48043	-0.362784	0.00607532
Q9C0F1-1	CEP44	3.12528	-2.33453	-0.362709	0.0653449
P13196	ALAS1	3.0512	-1.16339	-0.3626	0.295738
Q92759	GTF2H4	3.37915	-1.05029	-0.361573	0.340363
P29558-2	RBMS1	3.2267	-2.22901	-0.360818	0.074715
Q9Y2H9	MAST1	2.9459	-1.68563	-0.360002	0.15099
Q9P0U3-1	SENP1	3.16379	-2.09573	-0.359854	0.0886344
Q86X76	NIT1	3.23026	-1.63924	-0.359593	0.160402
Q9BRX8-1	FAM213A	3.03814	-0.666948	-0.359123	0.53353
Q96B54	ZNF428	3.1451	-0.986291	-0.35873	0.368046
Q6RI45	BRWD3	3.16192	-3.73529	-0.358595	0.0127965
Q6ZT12	UBR3	3.12118	-2.30008	-0.356226	0.0682577
E9PAV3	NACA	3.26716	-1.44591	-0.355811	0.206204
Q49A88-1	CCDC14	3.21502	-0.703092	-0.3556	0.512514
Q14CZ7	FASTKD3	3.16175	-1.48028	-0.354885	0.197231
O94953	KDM4B	3.10166	-2.23215	-0.354654	0.0744167
Q9UHL4	DPP7	3.12326	-1.02564	-0.354486	0.350814
Q9BR77-1	CCDC77	3.02512	-2.3686	-0.353913	0.0625948
Q99811	PRRX2	3.18358	-2.0571	-0.353605	0.0931599
Q9NUQ3-1	TXLNG	3.28229	-1.34749	-0.352673	0.234085
Q96A54	ADIPOR1	3.10997	-1.46835	-0.352562	0.200304
Q13309-1	SKP2	3.13571	-1.27126	-0.352328	0.258043
Q9Y5L4	TIMM13	3.12636	-1.15422	-0.351949	0.299159
Q13111-1	CHAF1A	3.19399	-3.16892	-0.351911	0.0238602
P15336-1	ATF2	3.16673	-2.63227	-0.351598	0.0450955
O75251	NDUFS7	3.20837	-2.64601	-0.351103	0.0443429
Q9H175	CSRNP2	3.14668	-1.2174	-0.350918	0.276292
Q8TE04-1	PANK1	3.14107	-2.09431	-0.35051	0.0887965
Q9BYV6-1	TRIM55	2.88571	-1.20141	-0.350297	0.281928
Q02127	DHODH	3.09456	-1.75968	-0.350273	0.13709
Q8WX93-1	PALLD	3.16254	-1.18202	-0.3499	0.288899
Q8NB37	PDDC1; GATD1	3.2284	-1.71005	-0.349817	0.146256
Q9BYP7-2	WNK3	3.11573	-1.02602	-0.349677	0.350649
Q19AV6	ZSWIM7	3.04012	-0.667614	-0.348503	0.533137
O94818-1	NOL4	3.22796	-1.29345	-0.346826	0.250848
O95248-4	SBF1	3.17374	-2.66134	-0.346293	0.0435192
Q9H425	C1orf198	3.21029	-2.17288	-0.345906	0.0802728
Q6IAA8	LAMTOR1	3.2059	-1.17008	-0.345821	0.293267
Q6VMQ6	ATF7IP	3.33435	-1.37524	-0.345234	0.225885
O95619	YEATS4	3.07422	-1.33206	-0.344635	0.238763
Q9UL33-1	TRAPPC2L	3.11517	-1.21478	-0.344535	0.277208
O60610-1	DIAPH1	3.14545	-1.78677	-0.344454	0.132333
P35052	GPC1	3.26264	-2.36535	-0.344113	0.0628515
Q8IVJ1	SLC41A1	2.86559	-1.0685	-0.342772	0.332814
Q8WUY9	DEPDC1B	2.94404	-1.20168	-0.34116	0.281831
P36896-1	ACVR1B	3.10934	-1.25201	-0.340975	0.264437
O43482	OIP5	2.99853	-0.810546	-0.340958	0.45345
P62826	RAN	3.26224	-3.301	-0.34048	0.0205404
P42356	PI4KA	3.18959	-3.07311	-0.339845	0.0266457
Q96KR7-1	PHACTR3	3.26951	-1.12745	-0.339001	0.309339
Q9Y6X9-1	MORC2	3.16076	-1.52241	-0.338717	0.186741
P20248	CCNA2	3.00206	-1.55514	-0.338618	0.178965
P49427	CDC34	2.98207	-1.83877	-0.338492	0.123662
Q9BUF5	TUBB6	3.1997	-1.90938	-0.338318	0.112809
Q8TDD1	DDX54	3.13267	-1.43567	-0.33813	0.208953
O60294	LCMT2	3.18504	-2.03209	-0.337162	0.0962183
P48681	NES	3.11612	-7.48894	-0.336982	0.000589797
Q9UMR5	PPT2	3.07365	-0.948646	-0.336752	0.385173
O95758-1	PTBP3	3.22204	-1.08334	-0.336488	0.326764
Q8N3X6-1	LCORL	3.13762	-1.23198	-0.336029	0.27124
O14832	PHYH	2.96826	-1.5935	-0.335807	0.170251
P07602-1	PSAP	3.18881	-1.09926	-0.335019	0.320381
Q9UJX4	ANAPC5	3.18533	-3.279	-0.334796	0.0210554
Q9UQL6-1	HDAC5	3.25817	-1.70939	-0.33475	0.146382
Q92805	GOLGA1	3.20921	-1.22312	-0.334412	0.2743
Q9NX62	IMPAD1	3.15677	-1.35425	-0.334093	0.232062
O94819	KBTBD11	3.11919	-1.019	-0.333837	0.353674
O75616-1	ERAL1	2.88778	-0.796461	-0.333828	0.460897
Q9Y223-1	GNE	3.12724	-2.35689	-0.333733	0.0635251
P61803	DAD1	3.12652	-1.31621	-0.333032	0.243657
P21359-6	NF1	3.21751	-1.61493	-0.332952	0.165564
O94964-2	SOGA1	3.0304	-2.40982	-0.332746	0.0594317
P08047	SP1	3.26096	-0.747444	-0.332663	0.48751
Q96CW6	SLC7A6OS	3.08948	-2.09852	-0.332547	0.0883171
Q9HA47	UCK1	3.12647	-2.50644	-0.332422	0.0526744
Q16842	ST3GAL2	3.17926	-1.03532	-0.332148	0.346679
Q9Y399	MRPS2	3.18323	-3.34645	-0.331617	0.0195206
Q9BPW8	NIPSNAP1	3.27515	-1.28727	-0.331164	0.252831
P12036	NEFH	3.10434	-1.89629	-0.331035	0.114744
Q641Q2	FAM21A; WASHC2A	3.2156	-1.29186	-0.331	0.251355
O94763-1	URI1	3.07125	-0.751781	-0.330965	0.485112
Q9BUI4	POLR3C; LOC101060460	3.12084	-3.29104	-0.33093	0.0207716
Q9P2L0-1	WDR35	3.19473	-3.96957	-0.330842	0.0100349
O14757	CHEK1	3.18693	-2.10438	-0.330785	0.0876529
Q8N335	GPD1L	3.04861	-1.43602	-0.330532	0.20886
Q8IWT3	CUL9	3.2525	-0.924361	-0.330453	0.396557
Q13615	MTMR3	3.18694	-1.42738	-0.329549	0.211203
O76031	CLPX	3.15148	-3.61066	-0.329498	0.0146133
Q9H1H9-4	KIF13A	2.9502	-0.98823	-0.32884	0.367181
P51790-2	CLCN3	3.17581	-1.1147	-0.328358	0.314292
O43896	KIF1C	3.07243	-1.06119	-0.328351	0.335827
Q8N9I0	SYT2	3.1958	-1.27291	-0.328329	0.2575
Q16864-1	ATP6V1F	3.18598	-0.683902	-0.327745	0.523601
Q9Y375	NDUFAF1	3.13435	-1.31214	-0.327685	0.244928
Q5JTD0-1	TJAP1	3.07258	-0.759387	-0.327656	0.480927
O00399	DCTN6	3.09171	-1.14857	-0.327473	0.301281
Q9BRQ6	CHCHD6	3.18347	-1.471	-0.326569	0.199617
Q16763	UBE2S	2.78497	-0.845595	-0.326369	0.435307
P48634-1	PRRC2A	3.10361	-4.29011	-0.326337	0.00729216
Q9Y520	PRRC2C	3.07118	-6.48315	-0.325397	0.00116527
Q03111	MLLT1	3.08631	-1.65528	-0.324795	0.157084
Q99784	OLFM1	3.1516	-1.32313	-0.324669	0.241508
O95425-4	SVIL	3.11836	-0.771211	-0.324287	0.474472
Q9NQ48	LZTFL1	3.19743	-1.80121	-0.324048	0.129865
O60229-1	KALRN	3.18617	-2.88636	-0.323609	0.0331798
O14641	DVL2	3.1444	-1.85699	-0.323343	0.120764
Q9NSK0-1	KLC4	3.10452	-1.34007	-0.323186	0.236324
Q9UK58	CCNL1	3.43216	-0.900521	-0.322825	0.40799
Q5TCQ9-4	MAGI3	3.17157	-1.48467	-0.322545	0.196113
Q16186	ADRM1	3.22181	-1.72927	-0.322368	0.142637
Q7Z333	SETX	3.10963	-2.66551	-0.322071	0.0432982
O00116	AGPS	2.97499	-1.03611	-0.321871	0.346344
A6NED2	RCCD1	3.2079	-2.3266	-0.321159	0.0660036
Q86XK2-1	FBXO11	3.12679	-1.28317	-0.321047	0.254158
Q9BZE1	MRPL37	3.24677	-3.02838	-0.320875	0.0280691
O14545	TRAFD1	3.15999	-2.36132	-0.320604	0.0631715
Q8NB90-1	SPATA5	3.16624	-1.35098	-0.32043	0.233039
Q9Y6J0	CABIN1	3.12619	-0.98113	-0.319897	0.370357
Q15750-1	TAB1	3.12426	-1.97125	-0.319833	0.104103
Q7L1Q6-1	BZW1	3.2971	-1.41146	-0.31972	0.215588
Q13416	ORC2	3.20267	-1.01262	-0.319292	0.356442
O75683	SURF6	3.16523	-1.23839	-0.318772	0.269045
Q9H7F0-1	ATP13A3	3.21347	-1.74315	-0.318591	0.140077
Q8IVU1	IGDCC3	3.19804	-1.61556	-0.318215	0.16543
O75146	HIP1R	3.06318	-0.743898	-0.317824	0.489477
Q99439	CNN2	3.18781	-1.02166	-0.317677	0.352528
Q8IWA4-1	MFN1	3.13224	-3.17372	-0.317624	0.0237297
O43395	PRPF3	3.04291	-0.92887	-0.316537	0.394423
P08651-5	NFIC	3.06256	-1.84285	-0.316471	0.123008
Q13561-1	DCTN2	3.11785	-0.857014	-0.316256	0.429515
Q15545	TAF7	3.14186	-3.3391	-0.316068	0.0196815
O95396	MOCS3	3.19288	-2.21857	-0.315548	0.0757165
Q96BS2-1	TESC	3.24074	-1.4487	-0.315437	0.205462
Q6PK18-1	OGFOD3	3.17967	-0.895029	-0.315412	0.41066
Q9P253	VPS18	3.1407	-2.5737	-0.315268	0.0484646
Q9Y6P5	SESN1	3.2452	-0.858639	-0.315011	0.428696
Q13283	G3BP1	3.13301	-3.35868	-0.31495	0.019256
Q6PI77	BHLHB9; ARMCX5-GPRASP2	3.02107	-1.7554	-0.314772	0.137857
Q86WB0	ZC3HC1	3.21605	-2.11146	-0.313942	0.0868583
Q8NCE0-1	TSEN2	3.28127	-1.05009	-0.313393	0.340449
P49842-1	STK19	3.19364	-1.03999	-0.313019	0.344698
Q9BPX3	NCAPG	3.11367	-2.35346	-0.31292	0.063801
P86790	CCZ1; CCZ1B	3.19733	-1.98952	-0.312247	0.101667
Q8N0S6	CENPL	3.2882	-1.49778	-0.312232	0.192806
Q9BSF4	C19orf52; TIMM29	3.09872	-1.62595	-0.312073	0.163204
Q15075	EEA1	3.15823	-2.36114	-0.311464	0.0631862
O15213	WDR46	3.14212	-1.87956	-0.311048	0.117269
O00471	EXOC5	3.21129	-2.02687	-0.310178	0.0968698
O95219	SNX4	3.18914	-1.75585	-0.309576	0.137776
Q9BWJ5	SF3B5	3.30055	-2.50616	-0.309503	0.052693
Q70EL1-1	USP54	3.18029	-0.8362	-0.308649	0.440116
Q9BQC6	MRP63; MRPL57	3.24358	-2.28405	-0.308032	0.0696605
Q9NWK9	ZNHIT6	3.15455	-1.92227	-0.308006	0.110935
Q9NWB6	ARGLU1	3.13524	-1.62317	-0.307981	0.163797
Q9ULI0	ATAD2B	3.27569	-1.06531	-0.307837	0.334124
Q96FX7	TRMT61A	3.09381	-1.2598	-0.307685	0.261833
Q9Y4W2	LAS1L	3.17293	-2.35076	-0.307665	0.0640191
P13473-2	LAMP2	3.24538	-1.76579	-0.307411	0.136002
P26373-1	RPL13	3.23426	-2.82815	-0.307023	0.0355664
Q8NHQ8-1	RASSF8	3.05729	-1.11259	-0.306616	0.315117
Q9Y6M9	NDUFB9	3.21647	-2.20167	-0.306049	0.0773693
P84074	HPCA	3.24325	-1.27051	-0.305952	0.25829
Q9H1K1	ISCU	3.14423	-2.24557	-0.305913	0.0731547
P14927	UQCRB	3.26936	-0.846045	-0.305693	0.435077
Q9NX24	NHP2	3.02332	-0.791753	-0.305653	0.463407
Q9UKI8-1	TLK1	3.1421	-1.40532	-0.305472	0.217302
P20936-1	RASA1	2.9055	-0.960205	-0.304585	0.379847
Q3B726	TWISTNB	3.20098	-1.63055	-0.304424	0.16223
P55199	ELL	3.12244	-0.903592	-0.304392	0.406503
P42773	CDKN2C	3.36385	-0.674024	-0.304015	0.52937
Q9BT67	NDFIP1	3.06587	-0.668882	-0.303324	0.532391
P82909	MRPS36	3.08861	-0.726938	-0.303022	0.498962
Q6IN85	SMEK1; PPP4R3A	3.18474	-2.21356	-0.302911	0.0762032
Q8IU85-1	CAMK1D	3.04421	-1.06903	-0.302824	0.332596
Q6P6C2-2	ALKBH5	3.01204	-0.706303	-0.302442	0.510675
Q8TBB5	KLHDC4	3.35677	-0.887498	-0.302299	0.414344
Q02818	NUCB1	3.166	-1.93596	-0.302291	0.10898
Q9UMR3	TBX20	2.84706	-1.12217	-0.302178	0.311381
Q13064	MKRN3	3.19206	-1.56609	-0.301998	0.176434
Q9H7Z3	NRDE2	3.15651	-1.66666	-0.301982	0.15477
Q2KHR2-1	RFX7	3.13383	-1.31153	-0.301883	0.245119
Q9H3R5	CENPH	3.12306	-2.63652	-0.301853	0.0448611
Q9H7Z7	PTGES2	3.07058	-1.05986	-0.301682	0.336379
Q06330-1	RBPJ	3.24222	-1.24401	-0.301659	0.267136
Q96JI7-1	SPG11	3.03384	-1.20452	-0.301403	0.280823
Q9UJA5-1	TRMT6	3.18921	-3.25397	-0.301142	0.0216591
Q96QC0	PPP1R10	3.31367	-0.665747	-0.300885	0.534238
O94880	PHF14	3.12774	-4.38742	-0.300421	0.00663807
Q8WYP5	AHCTF1	3.03933	-4.85982	-0.300223	0.00428487
Q99755-3	PIP5K1A	3.22631	-2.42647	-0.299735	0.0582041
Q13510	ASAH1	3.1825	-1.14583	-0.299495	0.302319
P14324	FDPS	3.20368	-1.68837	-0.299185	0.15045
P50238	CRIP1	3.16737	-2.25866	-0.298837	0.0719458
Q9Y5R8	TRAPPC1	3.26111	-1.61397	-0.298772	0.165772
Q9NTJ3-1	SMC4	3.17839	-4.0025	-0.298701	0.00970432
P26358-2	DNMT1	3.07092	-0.913447	-0.298516	0.401759
P06280	GLA	3.19275	-2.59699	-0.298341	0.0470928
P52789	HK2	3.23141	-1.71665	-0.298329	0.145004
Q99707	MTR	3.12717	-1.11647	-0.298244	0.313601
P15586	GNS	3.27962	-1.85642	-0.297451	0.120854
Q9UHV9	PFDN2	3.1832	-1.66259	-0.297028	0.155593
Q9Y485	DMXL1	3.03935	-1.86671	-0.29675	0.119245
Q9H977	WDR54	3.15428	-1.98988	-0.296234	0.101619
Q15334	LLGL1	3.24923	-2.49438	-0.296054	0.0534706
Q9BUK6	MSTO1	3.29557	-0.846793	-0.294676	0.434696
Q96G21	IMP4	3.16952	-1.37574	-0.294174	0.22574
Q92569	PIK3R3	2.6426	-0.645475	-0.291812	0.546283
P26583	HMGB2	2.45107	-0.646039	-0.291777	0.545945
P35249	RFC4	3.1188	-1.03624	-0.29173	0.34629
Q9BSM1	PCGF1	3.06443	-0.493428	-0.291523	0.642038
Q9C0J8	WDR33	3.18101	-1.78566	-0.291058	0.132525
P61086	UBE2K	3.18144	-2.27718	-0.290975	0.0702709
Q9ULJ8-3	PPP1R9A	3.13949	-1.68243	-0.290473	0.15162
A6NMB9	FIGNL2	3.1711	-2.27406	-0.289994	0.0705502
Q9UKY1	ZHX1	3.14548	-1.45878	-0.289794	0.202801
P17787	CHRNB2	3.06085	-0.909822	-0.289494	0.403499
Q8TAP6	CEP76	3.27597	-1.20139	-0.289471	0.281934
Q9ULW0	TPX2	3.06715	-2.67612	-0.289189	0.042741
Q13895	BYSL	3.25624	-1.94579	-0.289074	0.107599
Q96QE3-1	ATAD5	3.03094	-1.25434	-0.288864	0.263653
Q9NWX5	ASB6	3.16328	-1.62432	-0.287668	0.163552
Q96GM5	SMARCD1	3.14529	-1.31784	-0.287646	0.243151
Q14691	GINS1	3.3395	-0.788363	-0.287629	0.465219
Q9Y586	MAB21L2	3.18357	-1.8349	-0.287536	0.124288
Q13049	TRIM32	3.23291	-1.29572	-0.287413	0.250122
Q86UD0	SAPCD2	3.13139	-2.89596	-0.287102	0.0328036
P25205	MCM3	3.19633	-3.06597	-0.287044	0.0268673
O94776	MTA2	3.17247	-2.45978	-0.286912	0.055828
Q9UPT6	MAPK8IP3	3.27321	-1.14803	-0.28671	0.301487
Q16718	NDUFA5	3.24599	-1.41	-0.286655	0.215995
Q8NEY1	NAV1	3.09557	-2.36502	-0.28606	0.0628772
P62917	RPL8	2.85536	-1.05923	-0.285784	0.336639
Q9NVA1	UQCC; UQCC1	3.01282	-0.761214	-0.285318	0.479925
P62277	RPS13	3.20548	-1.02282	-0.285184	0.352027
Q8N0W3-1	FUK	3.17893	-1.4265	-0.285054	0.211444
Q96SI9	STRBP	3.20321	-1.41054	-0.284473	0.215844
P46100	ATRX	3.16506	-1.69136	-0.284196	0.149865
Q99447-1	PCYT2	3.25738	-0.768669	-0.283035	0.475854
Q6ZRV2	FAM83H	3.30992	-0.965615	-0.283032	0.377375
P25789	PSMA4	3.05752	-1.95817	-0.281827	0.105884
Q86SR1	GALNT10	3.19785	-0.954265	-0.281333	0.382576
Q13191-1	CBLB	3.07363	-1.3997	-0.281323	0.218883
Q9UPT5-1	EXOC7	3.15015	-2.15508	-0.281307	0.0821255
Q92556-1	ELMO1	3.12054	-1.31298	-0.280729	0.244666
Q9BQ15-1	NABP2	3.2687	-0.656784	-0.280213	0.539542
P40938	RFC3	3.19614	-2.09002	-0.279871	0.0892886
Q8N1F8	STK11IP	3.2431	-1.35058	-0.279812	0.23316
Q7L590-1	MCM10	3.14945	-0.937246	-0.279769	0.390484
Q3SYG4	BBS9	3.14628	-0.971817	-0.279612	0.374557
P22033	MUT	3.11516	-1.09181	-0.279485	0.323354
Q9ULH7	MKL2	3.17761	-1.8038	-0.279015	0.129428
Q9Y316-1	MEMO1	3.27173	-1.7424	-0.279003	0.140214
Q9Y2X9	ZNF281	3.27988	-1.56649	-0.27892	0.176342
Q15596	NCOA2	3.15375	-1.72819	-0.278216	0.142836
Q68E01	INTS3	3.16758	-3.81856	-0.27796	0.011726
Q9P2E9-1	RRBP1	3.11209	-2.38421	-0.277953	0.0613762
Q13625-1	TP53BP2	3.08402	-1.7569	-0.277755	0.137587
P55347	PKNOX1	3.10712	-0.844678	-0.277372	0.435774
Q9NQW6	ANLN	3.14782	-2.07949	-0.277181	0.0905079
O14562	UBFD1	3.00102	-0.736034	-0.276313	0.493859
P49773	HINT1	3.27949	-2.43896	-0.27629	0.0573006
Q9NZL4-1	HSPBP1	3.06988	-0.787179	-0.276083	0.465854
Q8IV08	PLD3	3.16131	-1.47194	-0.27583	0.199375
Q9Y487	ATP6V0A2	3.28789	-0.582241	-0.275497	0.584972
Q6PK04	CCDC137	3.19422	-1.64881	-0.275402	0.158414
Q15291-1	RBBP5	3.23532	-2.60308	-0.275257	0.0467416
Q9GZM8-1	NDEL1	3.18926	-1.05421	-0.275	0.338727
Q8TDX7-1	NEK7	3.14301	-1.11967	-0.274951	0.312351
O94766	B3GAT3	3.1925	-2.24975	-0.274671	0.0727656
Q8NCE2-1	MTMR14	3.22455	-1.24191	-0.274141	0.267849
Q68CP9-1	ARID2	3.1712	-2.28195	-0.273776	0.0698469
Q9UGU0	TCF20	3.15003	-1.6094	-0.273675	0.166761
Q9NPF0	CD320	3.27251	-0.678449	-0.273518	0.52678
Q6ZUT9-1	DENND5B	3.20306	-1.59551	-0.272696	0.169806
P41236	PPP1R2	3.1943	-1.30842	-0.272587	0.246095
Q96ND0	FAM210A	3.03568	-1.03321	-0.272578	0.347578
Q2KJY2-1	KIF26B	3.07289	-1.85197	-0.271981	0.121557
Q9BUT9-1	FAM195A; MCRIP2	3.06864	-0.699504	-0.271905	0.514574
Q9NVN8	GNL3L	3.06701	-1.78766	-0.271642	0.132178
O75943-1	RAD17	3.11608	-1.1455	-0.271612	0.302443
P55769	NHP2L1; SNU13	3.29418	-1.70152	-0.271331	0.147892
Q13572-1	ITPK1	3.19978	-1.98187	-0.271196	0.102679
Q9P016	THYN1	3.25686	-1.60104	-0.270934	0.168588
P55884	EIF3B	3.26274	-3.83403	-0.270783	0.0115385
Q9BYE7-1	PCGF6	3.20894	-2.10124	-0.270335	0.0880079
P41240	CSK	3.22113	-1.60224	-0.2702	0.168324
Q9UDT6-1	CLIP2	3.1666	-0.594809	-0.270171	0.57715
Q9H0H0	INTS2	3.26915	-1.15051	-0.270109	0.300553
Q96AY3	FKBP10	3.21723	-1.63749	-0.269652	0.160768
Q5RI15-1	COX20	3.19658	-0.712861	-0.269483	0.506932
Q96C57	C12orf43	3.26235	-0.603656	-0.268894	0.571683
Q13084	MRPL28	3.23939	-0.899381	-0.268706	0.408543
Q9H9S5	FKRP	3.21153	-0.61953	-0.268234	0.561954
Q04760-1	GLO1	3.18604	-1.24961	-0.267851	0.265242
Q9UKG9-1	CROT	3.19306	-1.22337	-0.267488	0.274212
Q71F23	MLF1IP; CENPU	3.16871	-2.3058	-0.267262	0.0677647
O95900	TRUB2	3.20592	-1.95265	-0.267211	0.106644
P50583	NUDT2	3.18142	-2.76626	-0.267025	0.0383131
P40222	TXLNA	2.80617	-0.642464	-0.266755	0.548087
Q8NCW6	GALNT11	3.18505	-0.816698	-0.266432	0.450225
Q9Y5P4-1	COL4A3BP	3.1601	-1.92335	-0.266208	0.110779
Q9H582-1	ZNF644	3.03235	-1.6694	-0.266072	0.154218
Q6P1M9	ARMCX5	3.11247	-1.40046	-0.266053	0.218667
Q9HD47	RANGRF	3.36387	-0.941979	-0.26562	0.388272
Q9UPN6	SCAF8	3.19091	-1.15537	-0.265206	0.298727
Q9H974-4	QTRTD1; QTRT2	3.09936	-0.833487	-0.265177	0.441511
Q9UBJ2	ABCD2	3.20047	-1.03848	-0.265155	0.345337
Q5T6S3	PHF19	3.08096	-1.0566	-0.264724	0.337732
O43524	FOXO3	3.10276	-0.640991	-0.264624	0.548971
Q01581	HMGCS1	3.09303	-4.88138	-0.264092	0.00420305
P56962	STX17	3.2055	-1.21182	-0.263946	0.278245
P07858	CTSB	2.59385	-1.25787	-0.263626	0.262476
Q96AE4-2	FUBP1	3.20872	-3.65782	-0.262544	0.0138933
Q96SN8	CDK5RAP2	3.23614	-1.08325	-0.26251	0.3268
O94952-1	FBXO21	3.10083	-2.87612	-0.262252	0.0335866
Q92665	MRPS31	3.21839	-2.12804	-0.262231	0.0850261
Q8N0X7	SPG20; SPART	3.2043	-0.712388	-0.262027	0.507201
Q6P2H3-1	CEP85	3.25699	-1.50095	-0.262004	0.192016
Q00537	CDK17	3.08111	-1.78756	-0.261817	0.132196
Q9H4A3-7	WNK1	3.23607	-1.58133	-0.2618	0.17297
Q9Y605	MRFAP1	3.11317	-0.708341	-0.261683	0.509509
Q9BRT9	GINS4	3.19722	-1.42568	-0.261564	0.211667
Q5T7P8	SYT6	3.46261	-0.769637	-0.260895	0.475328
Q9UNH5	CDC14A	2.89481	-1.04968	-0.260793	0.340619
Q00341-1	HDLBP	3.18469	-3.71249	-0.260277	0.0131086
Q86YA3-1	C4orf21; ZGRF1	3.15267	-2.09462	-0.260045	0.0887615
P07902	GALT	3.09662	-0.635173	-0.259817	0.552471
O43809	NUDT21	3.03165	-0.493271	-0.259376	0.642142
Q16513	PKN2	3.12675	-1.65747	-0.258787	0.156635
Q9P2E5-1	CHPF2	3.18156	-1.21063	-0.258367	0.278665
Q9BRX5	GINS3	3.16354	-0.773095	-0.258051	0.473449
O14949	UQCRQ	3.17106	-1.41973	-0.256803	0.2133
Q9UBU8-2	MORF4L1	2.96262	-1.14496	-0.256778	0.302646
P12955	PEPD	3.15104	-2.4634	-0.25676	0.0555762
P11387	TOP1	3.23836	-1.39952	-0.256615	0.218934
Q8N999-1	C12orf29	3.22036	-1.19778	-0.256186	0.28322
Q02086-1	SP2	3.18203	-0.781745	-0.255159	0.468774
Q9Y5A7-2	NUB1	3.19966	-1.09532	-0.254009	0.32195
Q86X02	CDR2L	3.24221	-0.716249	-0.253867	0.505005
P23434	GCSH	3.19704	-1.18601	-0.25385	0.287451
Q05BQ5	MBTD1	2.99301	-0.969291	-0.253513	0.375702
Q7Z7A4-1	PXK	3.1307	-1.03727	-0.253382	0.345851
Q6UB99	ANKRD11	3.05727	-2.81513	-0.252262	0.0361256
Q86VU5	COMTD1	2.85634	-0.443936	-0.251741	0.675129
Q6P4A7-1	SFXN4	2.99283	-0.697545	-0.251596	0.515702
P20700	LMNB1	3.22666	-2.23698	-0.251096	0.0739594
Q8WVQ1	CANT1	3.22918	-2.28762	-0.251086	0.0693457
Q86W50-1	METTL16	3.0571	-1.3288	-0.251073	0.239762
P48449-1	LSS	3.10825	-1.57458	-0.250652	0.174495
P78346-1	RPP30	3.17437	-1.64801	-0.249719	0.15858
Q2TAL8	QRICH1	3.20029	-0.812211	-0.249664	0.452575
Q9P2B4	CTTNBP2NL	3.1833	-1.5862	-0.249362	0.171876
Q9NR56-1	MBNL1	3.20756	-1.2168	-0.248907	0.2765
Q96SB8	SMC6	3.19203	-1.39309	-0.248736	0.220756
P46778	RPL21	3.39907	-0.758073	-0.248383	0.481648
Q9H089	LSG1	3.17665	-2.44252	-0.248255	0.0570459
O60566	BUB1B	3.12526	-1.44373	-0.247974	0.206786
O14653-1	GOSR2	3.16408	-1.73503	-0.247947	0.141568
Q8NFY9	KBTBD8	3.13298	-2.39469	-0.247812	0.0605721
P21266	GSTM3	3.41332	-0.795113	-0.246933	0.461615
Q96SU4-2	OSBPL9	3.19324	-1.5164	-0.246904	0.188204
O43909	EXTL3	3.11155	-1.63958	-0.246571	0.160332
Q56NI9	ESCO2	3.02044	-1.52865	-0.246563	0.185233
Q96LJ7	DHRS1	3.26921	-1.43173	-0.246417	0.210019
P10276	RARA	3.06889	-1.45046	-0.246161	0.204995
Q9BXB4	OSBPL11	3.30859	-0.663446	-0.245816	0.535596
Q07954	LRP1	3.19089	-0.881776	-0.24574	0.417159
Q8N9I9-1	DTX3	3.24522	-0.865655	-0.245483	0.425172
Q7L2E3-2	DHX30	3.11444	-1.33733	-0.245231	0.237157
Q9Y2L9-2	LRCH1	3.25169	-0.941087	-0.245183	0.388688
Q9BY32-1	ITPA	3.22154	-1.13363	-0.245161	0.306964
Q8NAF0	ZNF579	3.01191	-0.573779	-0.244997	0.590274
P51797-1	CLCN6	3.14081	-1.24473	-0.244777	0.266891
P23258	TUBG1	2.75537	-0.567657	-0.244218	0.594129
Q9BWF2	TRAIP	3.1309	-0.932041	-0.244085	0.392928
Q7Z2W9	MRPL21	3.13071	-2.90283	-0.244039	0.0325372
O75436-1	VPS26A	3.22344	-1.83292	-0.243972	0.12461
Q9P0J0	NDUFA13	3.14304	-1.64736	-0.243903	0.158713
Q99758	ABCA3	3.18793	-1.30078	-0.243902	0.248509
P63218	GNG5	3.20602	-1.21166	-0.243594	0.278302
Q99567	NUP88	3.14479	-0.751601	-0.243441	0.485212
Q9UHV7	MED13	3.12051	-1.5025	-0.243396	0.191629
Q13618	CUL3	3.28077	-1.31073	-0.242664	0.24537
Q6ZMI0-1	PPP1R21	3.08133	-0.960012	-0.242562	0.379935
Q9UPT9-1	USP22	3.25434	-0.749636	-0.242268	0.486297
P16298	PPP3CB	3.25773	-1.0187	-0.242221	0.353804
O95067	CCNB2	3.01694	-0.987774	-0.241796	0.367384
Q5TAQ9-1	DCAF8	3.10209	-1.01103	-0.241492	0.357132
Q16566	CAMK4	3.1654	-1.15763	-0.241444	0.297883
Q99747	NAPG	3.23807	-0.80381	-0.241202	0.457
Q96D46	NMD3	3.24704	-1.37627	-0.240422	0.225586
O94880-2	PHF14	3.0778	-2.16819	-0.240295	0.080756
Q14258	TRIM25	3.24016	-1.04319	-0.240156	0.343348
Q6PJ61	FBXO46	2.89623	-1.09041	-0.240079	0.323916
Q8N0Y2-1	ZNF444	3.26236	-1.22835	-0.239812	0.27249
P09001	MRPL3	2.69229	-0.338407	-0.239729	0.748423
P30153	PPP2R1A	3.13171	-3.18231	-0.239619	0.0234978
O75381-1	PEX14	3.2539	-1.42436	-0.239548	0.212028
Q96NU1	SAMD11	3.18421	-3.54208	-0.239393	0.0157372
Q9UHL9	GTF2IRD1	3.19636	-1.19928	-0.239207	0.282687
Q96KR1	ZFR	3.18117	-1.99855	-0.238504	0.100485
Q6ZUX3-1	FAM179A; TOGARAM2	3.12961	-0.871526	-0.238503	0.422241
Q2Y0W8	SLC4A8	3.16248	-1.13901	-0.238266	0.304906
Q9H2J4	PDCL3	3.22051	-1.10757	-0.238115	0.317091
Q99873	PRMT1	3.20939	-5.88958	-0.237984	0.00181583
Q9NRY4	ARHGAP35	3.15487	-1.28733	-0.237856	0.252814
Q14692	BMS1	3.17359	-2.94415	-0.237705	0.0309849
Q9Y330	ZBTB12	3.38842	-0.708417	-0.237626	0.509466
Q96G46	DUS3L	3.35141	-1.7903	-0.237451	0.131724
Q86XN7	PROSER1	3.05208	-0.901498	-0.237446	0.407516
O00461	GOLIM4	3.2146	-1.5391	-0.23743	0.182736
P15104	GLUL	2.9491	-0.934169	-0.237377	0.391927
O75127	PTCD1	3.17582	-0.594754	-0.237159	0.577184
Q06787-5	FMR1	3.28609	-1.19659	-0.237106	0.283645
Q02156	PRKCE	3.33974	-1.24828	-0.237104	0.265692
P06276	BCHE	3.07058	-0.885053	-0.236959	0.415545
O43502	RAD51C	3.14346	-0.842769	-0.236881	0.436749
Q99460	PSMD1	3.20607	-1.78119	-0.236703	0.133299
Q9BZ95	WHSC1L1; NSD3	3.1843	-1.09812	-0.236644	0.320834
Q8IWA0	WDR75	3.22399	-1.6817	-0.236288	0.151765
Q15629	TRAM1	3.13114	-0.97598	-0.236279	0.372675
P56182	RRP1	3.14629	-2.34685	-0.235407	0.0643354
Q9GZT9-1	EGLN1	3.43654	-0.524238	-0.235001	0.621894
P28370-1	SMARCA1	3.08922	-1.70568	-0.234811	0.147092
Q8N9N7	LRRC57	3.25108	-1.23209	-0.234575	0.271203
Q86YR5-1	GPSM1	3.19637	-1.45816	-0.23427	0.202964
Q9NPB8	GPCPD1	3.18346	-1.02766	-0.234163	0.34995
P25054-1	APC	3.11338	-0.982309	-0.233868	0.369828
Q9H4P4	RNF41	3.12129	-0.8678	-0.233768	0.424099
Q9NUQ8	ABCF3	3.17052	-1.41059	-0.233627	0.215829
P61421	ATP6V0D1	3.26375	-1.45294	-0.233591	0.20434
Q6ZRI6-2	C15orf39	3.14291	-1.41353	-0.233486	0.215013
Q9NNX1	TUFT1	2.99865	-0.991409	-0.232972	0.365766
P56589	PEX3	3.00687	-0.649966	-0.232407	0.543599
Q7L266	ASRGL1	3.16118	-1.36273	-0.231951	0.229549
P26196	DDX6	3.22512	-1.75755	-0.231787	0.137471
P35222	CTNNB1	3.18722	-1.83382	-0.231601	0.124463
Q13428-7	TCOF1	3.2512	-1.00089	-0.231507	0.361574
P13995	MTHFD2	3.21661	-2.42003	-0.23141	0.0586756
Q6P3X3	TTC27	3.09071	-1.94992	-0.231075	0.107024
Q5VSG8-1	MANEAL	3.15977	-0.929876	-0.23047	0.393948
O60870	KIN	3.13003	-1.29279	-0.230324	0.251057
O94855	SEC24D	3.15999	-2.54448	-0.230044	0.0502465
Q8IXV7	KLHDC8B	3.19752	-0.819614	-0.229982	0.448703
Q9Y3Q8	TSC22D4	3.15927	-0.981179	-0.229871	0.370335
O43719	HTATSF1	3.07876	-1.2364	-0.229699	0.269725
Q9H0F7	ARL6	3.19019	-1.14821	-0.229588	0.30142
Q96BR5	SELRC1; COA7	3.28369	-0.691171	-0.229446	0.519382
O00541-1	PES1	3.14013	-0.96623	-0.229339	0.377094
Q00534	CDK6	3.1654	-1.86985	-0.229197	0.11876
Q7Z417	NUFIP2	3.17308	-2.65837	-0.229185	0.0436778
Q8IW35-1	CEP97	3.13031	-0.975107	-0.228892	0.373069
O14618	CCS	3.36485	-0.664196	-0.22855	0.535153
Q8N531-1	FBXL6	3.08616	-0.635032	-0.227967	0.552556
O14974	PPP1R12A	3.19518	-1.91517	-0.227859	0.111963
Q68DQ2	CRYBG3	3.10701	-0.659375	-0.227856	0.538005
Q3SXM5	HSDL1	3.0698	-0.887905	-0.227785	0.414144
Q8N8R3-1	SLC25A29	3.17786	-1.12635	-0.227713	0.309761
Q6PIW4	FIGNL1	3.24501	-0.996526	-0.227633	0.363498
P62263	RPS14	3.14527	-0.835134	-0.22741	0.440664
P29692-2	EEF1D	3.41866	-0.746194	-0.227252	0.488203
O95249-1	GOSR1	3.05743	-0.54077	-0.227069	0.611235
Q8TF72	SHROOM3	3.10859	-1.29716	-0.226855	0.249662
O14578	CIT	3.19927	-1.97632	-0.226699	0.103422
P07339	CTSD	3.1845	-2.46556	-0.226628	0.0554266
P32121	ARRB2	3.27855	-1.2055	-0.22661	0.280476
Q9H0H5	RACGAP1	3.19925	-1.62376	-0.226556	0.163671
Q16543	CDC37	3.14498	-1.19171	-0.225641	0.285398
Q00653-1	NFKB2	3.16081	-2.3346	-0.225626	0.0653394
Q2M1K9	ZNF423	3.08679	-0.666742	-0.225556	0.533651
Q6P996-1	PDXDC1; LOC102724985	3.19646	-1.77993	-0.225541	0.133518
P15822-1	HIVEP1	3.04128	-0.732483	-0.225367	0.495847
A6NHQ2	FBLL1	2.56073	-0.341951	-0.22532	0.745906
Q99961	SH3GL1	3.15597	-1.2272	-0.224999	0.272887
Q9Y2Z0-1	SUGT1	3.1516	-1.57623	-0.224989	0.174121
Q7Z5K2-2	WAPAL; WAPL	3.13424	-1.69904	-0.224949	0.148371
P23025	XPA	3.06227	-0.788833	-0.224881	0.464968
Q99848	EBNA1BP2	2.87683	-0.583009	-0.2246	0.584492
Q9NRR4-1	DROSHA	3.12932	-0.912251	-0.224527	0.402332
Q13207	TBX2	3.16659	-0.986948	-0.22451	0.367753
Q9UQC2-1	GAB2	3.19961	-1.6694	-0.224476	0.154219
P62942	FKBP1A	3.20089	-1.07267	-0.223267	0.331104
Q9UHI6	DDX20	3.25897	-1.45608	-0.222917	0.203511
P0C1Z6	TFPT	3.06765	-1.08325	-0.222649	0.326802
Q96NE9-1	FRMD6	3.09309	-0.986238	-0.222622	0.36807
Q8NFA0	USP32	3.11905	-0.77646	-0.222442	0.471626
Q96RN5	MED15	3.23127	-0.926098	-0.221583	0.395734
Q9Y4R8	TELO2	3.21567	-2.20201	-0.221573	0.0773353
Q9NVX0	HAUS2	3.16837	-1.21936	-0.221568	0.275607
P00519	ABL1	3.2204	-0.81334	-0.221416	0.451984
Q5JSZ5-1	PRRC2B	3.14147	-2.63126	-0.220694	0.0451516
Q03113	GNA12	2.95734	-1.06692	-0.220439	0.333463
Q12926	ELAVL2	2.9693	-0.636915	-0.219957	0.551422
Q96H55-1	MYO19	3.14783	-0.49328	-0.219881	0.642136
Q9P289	MST4; STK26	3.09438	-1.24007	-0.219751	0.268473
Q8NHY2-1	RFWD2	3.13141	-1.0619	-0.219279	0.335535
P58004	SESN2	2.98465	-2.4154	-0.219256	0.0590169
Q8N573-1	OXR1	3.24407	-1.03071	-0.219234	0.348642
Q96RK4	BBS4	3.0887	-0.980752	-0.2191	0.370526
Q8IV38	ANKMY2	3.13373	-1.22516	-0.219062	0.273592
Q9ULJ3	ZBTB21; ZNF295	3.23699	-0.603648	-0.219024	0.571688
Q8IW45	CARKD; NAXD	3.14738	-1.43999	-0.219014	0.20779
Q96T51	RUFY1	3.16128	-2.20211	-0.218893	0.0773261
Q05655	PRKCD	3.24738	-1.34018	-0.218611	0.23629
Q86Y82	STX12	3.05081	-0.791543	-0.218172	0.463519
O15234	CASC3	3.14025	-0.772762	-0.217969	0.47363
Q96CX2	KCTD12	3.19098	-1.44262	-0.217821	0.207085
Q9BRJ7-1	NUDT16L1	3.27022	-0.830557	-0.217785	0.443023
Q9NVM9	ASUN; INTS13	3.17458	-0.968239	-0.217701	0.37618
P62266	RPS23	3.21145	-0.981938	-0.217561	0.369994
Q92520	FAM3C; WNT16	3.16875	-1.93819	-0.217469	0.108665
O15260-1	SURF4	3.00277	-0.807712	-0.216517	0.454941
Q8N6R0-5	METTL13	3.09231	-1.51787	-0.216508	0.187846
Q9NXG0-1	CNTLN	3.12426	-0.948353	-0.216402	0.385309
Q96JA3	PLEKHA8	3.11144	-1.30542	-0.2163	0.247042
Q96AB3	ISOC2	3.16855	-1.15376	-0.216147	0.299333
Q9Y6K9	IKBKG	3.17488	-0.60462	-0.215857	0.571089
P29373	CRABP2	3.25349	-0.67876	-0.215081	0.526599
Q9Y3C7	MED31	3.13097	-1.41091	-0.215067	0.215742
O15126-1	SCAMP1	3.13324	-1.24446	-0.214915	0.266984
P49736	MCM2	3.19477	-2.53208	-0.214882	0.0510243
Q9H6E5	TUT1	3.16304	-1.53171	-0.214666	0.184498
P26885	FKBP2	3.26881	-0.790042	-0.214482	0.464321
Q96KB5	PBK	3.26308	-2.23878	-0.214467	0.0737896
O75152	ZC3H11A	3.08125	-1.09892	-0.214394	0.320515
O95749	GGPS1	3.11964	-1.20935	-0.21431	0.279115
P08237	PFKM	3.21792	-1.71312	-0.214187	0.145672
Q8N684-1	CPSF7	3.14726	-0.860987	-0.213855	0.427514
Q96CQ1	SLC25A36	3.1085	-0.574793	-0.213659	0.589638
Q9UH73	EBF1	3.13962	-0.967487	-0.213524	0.376522
Q9BQ70	TCF25	3.11104	-1.25682	-0.213514	0.262826
Q6R327-1	RICTOR	3.14912	-1.29154	-0.212132	0.251458
Q7Z6M4	MTERFD2; MTERF4	3.20319	-0.702173	-0.211727	0.513041
Q13177	PAK2	3.13854	-1.58337	-0.211574	0.172511
Q2TAL5	SMTNL2	3.09556	-1.66477	-0.211438	0.155153
Q04864	REL	3.03686	-0.542356	-0.211343	0.610218
Q9UPA5	BSN	3.25931	-0.695343	-0.211261	0.516971
Q9UIF9-1	BAZ2A	3.08555	-1.808	-0.211211	0.128721
Q9HCD6-1	TANC2	3.14598	-1.54568	-0.210956	0.18118
O75496	GMNN	3.1427	-1.56072	-0.210935	0.177671
Q9Y2X3	NOP58	3.13251	-1.38615	-0.21017	0.222737
Q6P1K8	GTF2H2D; GTF2H2C_2; GTF2H2C	3.081	-0.905462	-0.2101	0.4056
Q5JSL3	DOCK11	3.18784	-0.942306	-0.210097	0.38812
Q8WXE0-1	CASKIN2	3.12826	-1.12861	-0.210038	0.308892
Q5VIR6-4	VPS53	3.16889	-1.53749	-0.209788	0.183118
P63208	SKP1	3.14865	-0.914555	-0.209747	0.401229
Q8TD26	CHD6	3.12459	-1.24717	-0.209627	0.266066
P11831	SRF	3.1733	-0.958172	-0.209321	0.380779
Q8IUC4	RHPN2	3.18262	-2.21777	-0.209041	0.0757942
Q6PJG6-1	BRAT1	3.22027	-2.84431	-0.20895	0.0348853
Q7L1T6	CYB5R4	3.27245	-0.925726	-0.208923	0.39591
P51398-1	DAP3	3.23885	-1.65312	-0.208788	0.157526
Q9UPQ7-1	PDZRN3	3.18406	-1.63152	-0.208701	0.162025
Q8WVB6	CHTF18	3.10851	-1.02866	-0.208624	0.34952
Q9Y5L0-2	TNPO3	3.1814	-1.4595	-0.208572	0.202613
Q3B7T1	C10orf137; EDRF1	2.99342	-0.809206	-0.208418	0.454155
Q9BT25	HAUS8	3.26203	-0.562089	-0.208359	0.597648
Q13322-1	GRB10	3.04777	-0.615296	-0.208002	0.564539
P30876	POLR2B	3.20484	-2.03063	-0.207958	0.0963999
Q8N6T3-1	ARFGAP1	3.28636	-1.92622	-0.20757	0.110367
Q15785	TOMM34	3.08385	-1.0774	-0.207357	0.329176
Q06609	RAD51	3.14351	-1.08124	-0.206938	0.327614
Q8IXJ6	SIRT2	3.11592	-0.926128	-0.206867	0.39572
O15344-1	MID1	3.17716	-0.72016	-0.20686	0.502788
Q9Y250	LZTS1	3.04635	-1.47188	-0.206737	0.199391
P10586-1	PTPRF	3.19382	-0.896075	-0.206471	0.410151
Q9BW27	NUP85	3.14572	-0.948981	-0.206376	0.385018
Q14344	GNA13	3.19013	-0.749519	-0.20635	0.486362
Q70J99-1	UNC13D	3.13137	-0.650936	-0.206306	0.543021
Q9NWS0-1	PIH1D1	2.97315	-0.647195	-0.206158	0.545254
P48735	IDH2	3.19289	-1.05278	-0.205748	0.339322
Q04726	TLE3	3.12166	-1.91697	-0.205454	0.111702
Q9HBD1-1	RC3H2	3.04769	-0.717445	-0.205082	0.504327
Q9H6D7	HAUS4	3.20115	-1.32303	-0.204809	0.24154
Q8ND04	SMG8	3.13498	-1.63706	-0.204713	0.160859
Q13033	STRN3	3.18508	-1.38177	-0.204011	0.223998
Q8WUY3-1	PRUNE2	3.13015	-2.23825	-0.203742	0.0738404
P07197	NEFM	3.22564	-1.82178	-0.203543	0.126431
P12694	BCKDHA	3.18872	-1.20917	-0.203508	0.279179
O14908-1	GIPC1	3.09692	-1.0706	-0.203366	0.331952
O60344-4	EEF1AKMT4; ECE2; EEF1AKMT4-ECE2	3.10121	-0.496358	-0.203181	0.640107
O15305	PMM2	3.04861	-1.2251	-0.203015	0.273614
P42858	HTT	3.20386	-2.49069	-0.20299	0.0537166
Q8NBN7	RDH13	3.1578	-1.57675	-0.20214	0.174003
Q7Z4S6-1	KIF21A	3.07036	-4.55677	-0.202075	0.00565436
Q92905	COPS5	3.28202	-1.20759	-0.20197	0.279737
P17098	ZNF8	3.13956	-0.964876	-0.201723	0.377711
Q9UJX6	ANAPC2	3.14462	-0.634775	-0.201704	0.552711
O15381-1	NVL	3.25434	-1.66927	-0.201284	0.154245
Q9NQZ2	UTP3	2.9649	-1.29069	-0.201283	0.251731
Q9UKX7	NUP50	3.01741	-1.1052	-0.201137	0.318024
Q01850	CDR2; LOC101060399	2.43176	-0.305649	-0.201073	0.771846
O60832-1	DKC1	3.07972	-0.961595	-0.200891	0.37921
Q9H1P3-1	OSBPL2	3.16865	-1.92177	-0.200339	0.111008
O60921	HUS1	3.20546	-4.65842	-0.200184	0.00514506
Q86TI2	DPP9	3.19033	-1.71537	-0.200147	0.145246
P62244	RPS15A	3.1725	-1.84922	-0.200097	0.121992
P53621-2	COPA	3.21149	-1.71736	-0.199369	0.144868
Q08AE8-2	SPIRE1	3.16911	-0.78271	-0.199242	0.468255
Q8WXI9	GATAD2B	3.16024	-2.70521	-0.199193	0.0412534
Q9H553-1	ALG2	3.24818	-0.623939	-0.199061	0.559271
P10244	MYBL2	3.30924	-0.613748	-0.198871	0.565486
Q9UJC3	HOOK1	3.1502	-0.942495	-0.198854	0.388031
Q96JN0-3	LCOR	3.12677	-0.878532	-0.197786	0.418762
P16401	HIST1H1B	3.30899	-0.522711	-0.197502	0.622884
Q9BX63	BRIP1	3.22223	-0.843849	-0.197333	0.436197
Q96K80	ZC3H10	3.12043	-0.325888	-0.197259	0.75734
Q9H2P0	ADNP	3.24022	-1.8814	-0.197229	0.116988
Q9Y5J1	UTP18	3.04932	-1.31894	-0.197226	0.242808
Q86WX3	RPS19BP1	3.21711	-0.788333	-0.197136	0.465236
Q9ULD0	OGDHL	3.21246	-1.59043	-0.197045	0.170933
Q92547	TOPBP1	3.21301	-1.88136	-0.196821	0.116994
P78332	RBM6	3.24546	-1.61958	-0.19663	0.164565
Q5T7V8	GORAB	3.21984	-0.751078	-0.195812	0.4855
Q9H6R0-1	DHX33	3.2583	-1.2347	-0.19548	0.270307
P49756-1	RBM25	3.19873	-0.886319	-0.195155	0.414923
Q9Y6I4-1	USP3	3.18409	-1.77251	-0.195137	0.134816
Q9Y263	PLAA	3.18693	-1.66353	-0.194738	0.155404
Q9Y285	FARSA	3.17296	-2.42004	-0.194729	0.0586746
P36894	BMPR1A	3.24789	-0.980215	-0.194683	0.370768
O75534	CSDE1	3.09914	-1.45299	-0.194362	0.204326
Q8IZA0	KIAA0319L	3.18647	-0.807702	-0.194262	0.454947
O60476	MAN1A2	2.98773	-0.72263	-0.194239	0.501392
Q13838-1	DDX39B	3.2305	-1.35661	-0.193964	0.23136
Q09328	MGAT5	3.0962	-1.31791	-0.193448	0.243128
Q5TF21	SOGA3	3.14513	-0.776702	-0.193442	0.471495
O00522	KRIT1	3.09907	-1.67671	-0.193031	0.152755
P62081	RPS7	3.04481	-0.764576	-0.192633	0.478087
Q14679	TTLL4	3.06219	-0.627933	-0.192287	0.556848
P35626	ADRBK2; GRK3	3.21665	-1.66181	-0.192068	0.155752
O15360	FANCA	3.13388	-1.14704	-0.192066	0.301862
Q92552	MRPS27	3.16723	-1.06806	-0.192007	0.332996
Q76L83	ASXL2	3.05562	-0.684265	-0.19179	0.52339
Q9BS34	ZNF670	3.13099	-1.17614	-0.191324	0.291043
O15372	EIF3H	3.18902	-1.80748	-0.191178	0.128809
O95347-1	SMC2	3.13714	-1.20425	-0.190987	0.280919
Q7KZ85	SUPT6H	3.02231	-0.796786	-0.190857	0.460725
Q7L775	EPM2AIP1	3.2644	-1.0081	-0.19043	0.358413
Q9HBK9	AS3MT	3.16863	-1.75146	-0.189943	0.138568
Q13951-2	CBFB	3.19587	-2.02339	-0.18966	0.0973076
Q96EK2-3	PHF21B	3.02416	-0.531211	-0.189589	0.617385
P62249	RPS16	3.25241	-1.75192	-0.189361	0.138484
Q9NXC5-1	MIOS	3.2044	-1.05702	-0.188714	0.337558
Q8NCN4	RNF169	3.08549	-0.865982	-0.188562	0.425009
Q3B7J2-1	GFOD2	3.07974	-0.923631	-0.188508	0.396903
Q9P2N5	RBM27	3.15769	-1.61894	-0.188474	0.164703
Q9Y6G3	MRPL42	2.90882	-0.261593	-0.188447	0.80378
Q8TCG2	PI4K2B	3.06228	-0.729294	-0.188358	0.497637
P49815-4	TSC2	3.08435	-1.37916	-0.188257	0.224751
Q14687	GSE1	3.30642	-0.963656	-0.187518	0.378269
Q99570	PIK3R4	3.12474	-1.04135	-0.187337	0.344122
P23458	JAK1	3.04088	-1.0209	-0.187293	0.352852
Q09327	MGAT3	3.22803	-0.544782	-0.186613	0.608664
Q96RT7	TUBGCP6	3.18999	-0.435317	-0.18652	0.68098
Q9P1Z2-1	CALCOCO1	3.17046	-1.61511	-0.186476	0.165525
Q5VSL9-1	STRIP1	3.13994	-2.07652	-0.186436	0.0908553
Q9Y5Z7	HCFC2	3.11905	-0.659362	-0.186158	0.538012
Q9H0N5	PCBD2	3.20735	-0.887015	-0.185872	0.414581
Q8WUM0	NUP133	3.23108	-1.33191	-0.185808	0.238809
O60427	FADS1	3.2693	-0.525633	-0.185576	0.620991
Q9H446	RWDD1	3.39454	-0.957627	-0.185372	0.381029
Q9UID3-1	VPS51	3.16207	-0.598769	-0.184924	0.574699
Q14562	DHX8	3.19139	-1.41508	-0.184915	0.214584
Q9NWM3-1	CUEDC1	3.17159	-0.496803	-0.184707	0.639814
Q06203	PPAT	3.16306	-0.840663	-0.184364	0.437826
O95299	NDUFA10	3.23667	-1.37759	-0.184211	0.225203
P50607	TUB	3.09453	-0.627484	-0.184052	0.55712
Q9UEW8	STK39	3.19632	-1.10361	-0.183859	0.318656
Q9NQS7	INCENP	3.00926	-1.00151	-0.183735	0.3613
Q9NQ50	MRPL40	3.18825	-1.88399	-0.183604	0.116595
P28347	TEAD1	3.02661	-0.57566	-0.183325	0.589093
Q8N108	MIER1	3.15753	-2.31915	-0.183186	0.0666282
Q8N8A6	DDX51	3.16831	-1.36936	-0.182778	0.2276
Q5SVZ6	ZMYM1	3.12341	-0.656753	-0.182738	0.53956
O43824	GTPBP6	3.18236	-2.18084	-0.182733	0.0794581
O14813	PHOX2A	3.21249	-1.80485	-0.182432	0.129251
Q9NY97-1	B3GNT2	3.17618	-0.912751	-0.181896	0.402093
Q7Z6J0-1	SH3RF1	3.22088	-1.50045	-0.181656	0.192139
Q9NUI1	DECR2	3.18603	-0.806862	-0.181556	0.455389
Q96L58	B3GALT6	3.20172	-0.48899	-0.181513	0.644969
Q9GZN1	ACTR6	3.05813	-0.871098	-0.181507	0.422454
Q96NL6-1	SCLT1	3.14037	-0.679221	-0.181435	0.52633
O00303	EIF3F	3.16688	-0.804539	-0.181408	0.456615
P83731	RPL24	3.35949	-0.756161	-0.181314	0.482699
O14530	TXNDC9	3.2608	-0.794665	-0.181155	0.461854
Q96RS0	TGS1	3.1906	-1.50025	-0.180634	0.192189
O00268	TAF4	3.19047	-0.64287	-0.180449	0.547844
Q9H871-1	RMND5A	3.34963	-0.466898	-0.180363	0.659667
Q9UN70-1	PCDHGC3	3.24799	-1.67218	-0.180343	0.15366
O75592-1	MYCBP2	3.20029	-1.99377	-0.180312	0.101109
O95858	TSPAN15	3.17624	-0.83776	-0.17955	0.439314
Q15021	NCAPD2	2.86215	-0.961738	-0.179227	0.379145
O75553-5	DAB1	3.20281	-0.695486	-0.179192	0.516889
Q9NVZ3	NECAP2	3.14861	-0.449106	-0.179172	0.671631
O95639	CPSF4	3.18733	-1.34148	-0.178514	0.235898
Q71RC2	LARP4	3.06921	-1.08717	-0.178374	0.32522
Q02543	RPL18A	3.26406	-1.99716	-0.178331	0.100666
Q9UNN5-1	FAF1	3.19621	-1.50973	-0.178227	0.189841
Q14202-2	ZMYM3	3.23877	-0.940637	-0.177644	0.388898
Q9Y618-3	NCOR2	3.15936	-2.08363	-0.177601	0.0900263
P53609	PGGT1B	3.03728	-0.623872	-0.177392	0.559312
P12004	PCNA	3.14123	-2.96707	-0.177388	0.0301593
Q7Z6B0-1	CCDC91	3.10031	-0.733283	-0.177285	0.495399
Q69YH5-1	CDCA2	3.23273	-0.470476	-0.177117	0.657275
Q12972-1	PPP1R8	3.2031	-0.99159	-0.176651	0.365686
Q86Y97	SUV420H2; KMT5C	2.96601	-0.539167	-0.176472	0.612264
Q96MF7	NSMCE2	3.1494	-1.11367	-0.176433	0.314696
Q96C01	FAM136A	3.1325	-0.702269	-0.176165	0.512986
Q2M389	KIAA1033; WASHC4	3.16337	-2.20364	-0.176041	0.077175
O60216	RAD21	3.28976	-0.706447	-0.175916	0.510592
Q9UBN7-1	HDAC6	3.25155	-1.23145	-0.175722	0.271424
Q9HBL8	NMRAL1	3.31847	-0.60713	-0.17554	0.569544
Q9NXH9-1	TRMT1	3.22302	-0.815999	-0.175517	0.450591
Q9ULX6	AKAP8L	3.28686	-0.768344	-0.1755	0.476031
O75962-1	TRIO	3.19057	-1.58884	-0.175215	0.171287
Q02410	APBA1	3.03158	-0.550768	-0.175161	0.604841
Q8TAP9	MPLKIP	3.21564	-0.424276	-0.175151	0.688512
Q969W8	ZNF566	3.07026	-0.725365	-0.175078	0.499848
Q9C0C2	TNKS1BP1	3.15691	-1.96649	-0.175029	0.104747
P21281	ATP6V1B2	3.15596	-1.16606	-0.174909	0.294752
Q7Z4L5	TTC21B	3.14121	-0.688176	-0.174502	0.521117
O95793	STAU1	3.12393	-1.30296	-0.174435	0.24782
Q9H078-2	CLPB	3.07158	-0.687469	-0.174404	0.521528
Q99584	S100A13	2.99746	-0.752875	-0.174367	0.484508
Q09472	EP300	3.17054	-1.61964	-0.174255	0.164553
Q12768	KIAA0196; WASHC5	3.10445	-1.50114	-0.174076	0.191967
Q6ZWE6-1	PLEKHM3	3.15335	-1.51224	-0.173977	0.189223
Q9BU89	DOHH	3.01215	-0.730325	-0.173844	0.497058
O60664-1	PLIN3	3.13818	-1.28197	-0.173622	0.254545
Q13015	MLLT11	3.32486	-0.595812	-0.173329	0.576528
Q96A65	EXOC4	3.26844	-0.690987	-0.172874	0.519489
Q9H115	NAPB	3.14028	-0.443072	-0.172846	0.675713
Q9H2Y7	ZFP106; ZNF106	3.22688	-0.957366	-0.172833	0.38115
Q9BTW9	TBCD	3.20802	-1.34579	-0.172172	0.234596
Q5BKX5-1	C19orf54	3.18762	-0.5699	-0.172163	0.592715
P61201-1	COPS2	3.38645	-0.551301	-0.171926	0.604501
P50747	HLCS	3.20515	-1.10783	-0.17174	0.316988
Q93050-1	ATP6V0A1	3.16992	-1.07763	-0.171435	0.329081
Q2V2M9-1	FHOD3	3.07079	-0.516603	-0.171265	0.626852
P51946	CCNH	3.23026	-0.93431	-0.171103	0.391861
Q9UJW0-1	DCTN4	3.13748	-1.83221	-0.170726	0.124725
Q9BTT4	MED10	3.15809	-1.14716	-0.170594	0.301813
O15066	KIF3B	3.12676	-2.2077	-0.170493	0.0767756
O00170	AIP	3.06476	-0.727979	-0.170478	0.498376
Q14108-1	SCARB2	3.25718	-1.79173	-0.170305	0.13148
Q6SPF0	SAMD1	3.12036	-1.64132	-0.17029	0.159968
Q5IJ48	CRB2	3.09968	-0.550649	-0.169689	0.604917
Q9UBK7-2	RABL2A	3.15626	-1.48302	-0.16934	0.196532
Q07866-6	KLC1	3.1763	-0.994132	-0.168905	0.364558
Q09019	DMWD	3.09676	-0.888299	-0.168639	0.413951
P50336	PPOX	3.25549	-1.05202	-0.168519	0.339639
Q8NFU7	TET1	3.16237	-0.400778	-0.168312	0.704676
Q16531	DDB1	3.24573	-1.78971	-0.168239	0.131826
Q9NR30-1	DDX21	3.21058	-1.35804	-0.167895	0.230937
Q9H410	DSN1	3.15897	-1.04855	-0.167889	0.341092
P08397-1	HMBS	3.22232	-1.33056	-0.167671	0.239221
Q96GD3-4	SCMH1	3.20801	-1.00891	-0.167552	0.35806
Q9Y243-1	AKT3	3.21631	-1.28794	-0.167456	0.252617
Q5VWN6-1	FAM208B	3.19445	-1.83103	-0.167262	0.124917
Q9Y5Q8-3	GTF3C5	2.90423	-0.468904	-0.167191	0.658325
P55795	HNRNPH2	3.22435	-1.37945	-0.167079	0.224665
Q9BTE7	DCUN1D5	3.1987	-1.74968	-0.166957	0.138889
Q96MZ0	GDAP1L1	3.24412	-0.464486	-0.166907	0.661282
Q8WUZ0-1	BCL7C	3.21968	-1.05255	-0.166899	0.339418
Q14320	FAM50A	3.22613	-2.23667	-0.165915	0.073989
Q9NRL2	BAZ1A	3.133	-1.44044	-0.165723	0.20767
Q13686	ALKBH1	3.31683	-0.511352	-0.16547	0.630276
Q8NFC6	BOD1L1	3.16708	-1.5972	-0.165252	0.169433
O60934	NBN	3.18629	-2.5764	-0.164785	0.0483032
Q9Y295	DRG1	3.13304	-0.433729	-0.164665	0.68206
Q9Y5T5-2	USP16	3.14836	-1.24891	-0.164637	0.265478
Q96SW2-1	CRBN	3.21206	-1.02977	-0.164533	0.349046
Q9Y2I1-1	NISCH	3.15499	-0.490637	-0.1643	0.643881
Q96II8-1	LRCH3	3.18681	-0.586482	-0.164193	0.582325
Q9Y221-1	NIP7	3.22568	-0.769391	-0.164013	0.475462
P23284	PPIB	2.82119	-0.291678	-0.163951	0.781922
P08754	GNAI3	3.28184	-1.40239	-0.163934	0.218126
Q8N4H5	TOMM5	2.89722	-0.635438	-0.163811	0.552312
Q99613	EIF3C	3.13889	-1.63809	-0.163716	0.160642
Q8WXA3	RUFY2	3.25503	-0.456081	-0.163552	0.666927
Q676U5	ATG16L1	3.26623	-1.14608	-0.163509	0.302223
Q8NDT2	RBM15B	3.05911	-0.463873	-0.16348	0.661693
A0AVF1	TTC26	3.18004	-1.13281	-0.163103	0.307275
Q8WZA9	IRGQ	3.15853	-1.57375	-0.162895	0.174684
Q8WW38-1	ZFPM2	3.17432	-0.825286	-0.16288	0.445752
Q7Z7A1	CNTRL	3.10041	-0.43059	-0.16276	0.684199
Q9NYB0	TERF2IP	3.11373	-1.04843	-0.162466	0.341145
O15355	PPM1G	0.475996	-0.119936	-0.162461	0.909075
Q8TAE8	GADD45GIP1	3.26453	-0.949201	-0.162296	0.384916
Q10587	TEF	3.02106	-0.72728	-0.162145	0.49877
Q13449	LSAMP	3.2422	-0.595868	-0.162067	0.576494
Q03001-7	DST	3.16475	-3.6703	-0.162015	0.0137097
Q13601	KRR1	3.17196	-1.56779	-0.161949	0.176043
Q8TEH3	DENND1A	3.19074	-0.457807	-0.161758	0.665766
Q9UKE5-3	TNIK	3.1686	-0.874513	-0.161514	0.420755
Q15397	KIAA0020; PUM3	3.15256	-0.858454	-0.160912	0.428789
Q6N021	TET2	3.15524	-1.20424	-0.160904	0.280924
Q96Q15-1	SMG1	3.20696	-1.9561	-0.160849	0.106169
P28702	RXRB	3.09517	-0.608581	-0.160772	0.568653
Q9BX10	GTPBP2	3.18406	-0.720098	-0.160619	0.502824
Q7Z5J4	RAI1	3.1246	-1.29308	-0.160107	0.250966
P61088	UBE2N	3.21802	-1.22228	-0.160044	0.274591
P31146	CORO1A	3.25437	-0.800841	-0.159946	0.458572
O43148-1	RNMT	3.19875	-2.14714	-0.159811	0.0829664
Q9NUJ3	TCP11L1	3.13813	-1.29411	-0.159695	0.250634
Q9H204	MED28	3.19803	-1.26778	-0.159694	0.259187
P15880	RPS2	3.18115	-2.72227	-0.159642	0.0404078
Q96RR4-3	CAMKK2	3.09762	-0.921295	-0.159603	0.398013
P36551	CPOX	3.22276	-1.5415	-0.159592	0.182167
P22626	HNRNPA2B1	3.10696	-1.52162	-0.158528	0.186933
Q8N3Y1	FBXW8	3.10428	-0.624169	-0.158402	0.559132
Q14197	ICT1; MRPL58	3.14712	-0.731344	-0.158365	0.496486
Q9Y2R5	MRPS17	3.16283	-0.958307	-0.158088	0.380717
Q6UVJ0	SASS6	3.19604	-1.09547	-0.157965	0.32189
Q27J81	INF2	3.20414	-0.481572	-0.157912	0.649885
Q9H0W8	SMG9	3.16404	-0.831226	-0.15783	0.442678
Q96EV8-1	DTNBP1	3.08518	-0.918447	-0.157725	0.399369
P21283	ATP6V1C1	3.18879	-2.66724	-0.157549	0.043207
Q6NZY4	ZCCHC8	3.20015	-0.514978	-0.157229	0.62791
Q96F24-1	NRBF2	3.20386	-0.594912	-0.157018	0.577086
P35221	CTNNA1	3.16575	-1.53631	-0.15697	0.1834
Q9ULF5	SLC39A10	3.2323	-1.18832	-0.156904	0.286618
Q9Y5U2-1	TSSC4	3.22476	-0.580347	-0.156142	0.586156
Q562E7-1	WDR81	3.10326	-0.920843	-0.155947	0.398228
Q14686	NCOA6	3.19273	-1.27543	-0.155924	0.256675
O75489	NDUFS3	3.20798	-1.18549	-0.155651	0.287638
Q6ZRS2	SRCAP	3.16719	-2.23052	-0.155593	0.0745714
Q9Y6J9	TAF6L	3.14361	-1.01111	-0.15557	0.357096
Q8N428	GALNT16; GALNTL1	3.00498	-0.466791	-0.155073	0.659739
Q8N3P4-1	VPS8	3.14629	-1.12513	-0.154859	0.310233
Q13303-1	KCNAB2	3.28213	-0.550555	-0.154795	0.604976
Q9BZV1	UBXN6	3.18681	-1.3016	-0.154444	0.24825
Q10570	CPSF1	3.20804	-1.89847	-0.154293	0.114419
O00743	PPP6C	3.195	-0.93641	-0.154236	0.390876
Q5SW79-1	CEP170	3.16266	-1.92621	-0.154096	0.110369
Q9Y5K8	ATP6V1D	3.25893	-1.31124	-0.15404	0.24521
P49795	RGS19	3.06091	-1.05078	-0.15384	0.340159
P08865	RPSA	3.28083	-1.00149	-0.153831	0.361308
Q9BRT2	MNF1; UQCC2	3.09746	-0.544436	-0.153545	0.608886
P48200	IREB2	2.85904	-0.540271	-0.153506	0.611555
Q8IYR2	SMYD4	3.12302	-0.452384	-0.153424	0.669418
Q96A19	CCDC102A	3.15439	-0.699761	-0.153201	0.514427
Q07864	POLE	3.20601	-1.92699	-0.153134	0.110256
P61970	NUTF2	3.15292	-1.26008	-0.153073	0.26174
Q9UQ13	SHOC2	3.1303	-0.444132	-0.152563	0.674995
O15143	ARPC1B	3.21728	-0.992347	-0.152403	0.36535
Q8IWZ6-1	BBS7	3.12879	-0.809392	-0.152026	0.454057
Q9BVQ7-1	SPATA5L1	3.10498	-0.915929	-0.151982	0.400572
Q14247-1	CTTN	3.16702	-1.20169	-0.151952	0.281826
Q15386-1	UBE3C	3.17085	-0.930787	-0.151761	0.393519
P14550	AKR1A1	3.19295	-1.53264	-0.151745	0.184276
Q6P9B9	INTS5	3.20778	-1.54162	-0.151663	0.182139
Q86UA1	PRPF39	3.21183	-0.992651	-0.151613	0.365215
Q66GS9-1	CEP135	3.15277	-1.32373	-0.151431	0.241324
O75379-1	VAMP4	3.31343	-0.431639	-0.151159	0.683484
P25787	PSMA2	3.08963	-1.15924	-0.150848	0.297284
Q96BY7	ATG2B	3.23988	-0.758938	-0.150706	0.481173
Q96EK5	KIAA1279; KIF1BP	3.16118	-0.774021	-0.15061	0.472947
O75955	FLOT1	3.19727	-0.720339	-0.150604	0.502687
Q9NWB7	IFT57	3.043	-0.824012	-0.150564	0.446413
Q9H5V9-1	CXorf56	3.11594	-0.641725	-0.150509	0.54853
Q9NR50-1	EIF2B3	3.20354	-0.607044	-0.150498	0.569598
Q9UMS6-2	SYNPO2	3.29323	-0.43503	-0.150449	0.681174
Q6PID6	TTC33	3.04285	-0.487229	-0.150401	0.646134
Q969V6	MKL1	3.14475	-1.04982	-0.150262	0.340561
Q9NS91	RAD18	3.14548	-1.87736	-0.149943	0.117605
Q9UNZ5	C19orf53	3.21011	-1.1415	-0.149517	0.30396
Q9BUJ2-1	HNRNPUL1	3.29299	-1.79349	-0.149398	0.131178
Q9P2D3-1	HEATR5B	3.23969	-1.36888	-0.149377	0.227741
Q9NQT5	EXOSC3	3.16238	-0.847085	-0.149313	0.434547
Q9UGR2-2	ZC3H7B	3.20878	-1.70281	-0.149246	0.147644
Q14203	DCTN1	3.20054	-1.98734	-0.149219	0.101955
Q9UK73	FEM1B	3.07595	-0.513068	-0.149085	0.629156
A3KN83-1	SBNO1	3.09587	-1.91839	-0.148887	0.111495
Q99959	PKP2	3.09497	-0.602744	-0.148474	0.572245
Q8IZH2-1	XRN1	3.12324	-1.36363	-0.148375	0.229284
Q5TFE4	NT5DC1	3.1621	-0.736799	-0.148119	0.493432
Q96GK7	FAHD2A	3.17577	-0.581843	-0.147983	0.585221
O94822	LTN1	3.13486	-1.37857	-0.147848	0.224921
Q6PL18-1	ATAD2	3.1867	-1.78975	-0.147771	0.13182
Q8N2K1-1	UBE2J2	3.19235	-0.66931	-0.147726	0.532139
Q8NI08	NCOA7	3.20106	-0.875328	-0.14731	0.42035
Q9P2Q2	FRMD4A	3.04993	-0.306479	-0.147212	0.771249
Q86W92-2	PPFIBP1	2.77333	-0.422125	-0.147168	0.689984
P09132-1	SRP19	3.04933	-0.437939	-0.146711	0.679197
Q8IZD2-1	KMT2E; MLL5	3.12515	-0.749804	-0.146638	0.486204
O95684	FGFR1OP	3.14774	-2.0311	-0.146576	0.0963419
O15061-1	SYNM	3.17448	-2.04736	-0.145926	0.0943389
Q15311	RALBP1	3.23306	-1.5178	-0.145785	0.187862
Q8TBM8	DNAJB14	3.15528	-0.354446	-0.145498	0.737062
Q8TBC4-1	UBA3	3.16813	-0.849005	-0.145446	0.433571
Q969X6	CIRH1A; UTP4	3.22061	-1.49585	-0.145104	0.19329
Q6PI48	DARS2	3.23922	-1.3165	-0.144898	0.243566
Q4KMP7	TBC1D10B	3.32717	-0.573173	-0.14478	0.590655
Q8NBN3-1	TMEM87A	3.1318	-0.669757	-0.14439	0.531876
Q9H061-1	TMEM126A	3.2425	-1.13804	-0.144356	0.305274
O60658-1	PDE8A	3.08488	-0.425906	-0.143877	0.687397
Q00796	SORD	3.2223	-1.30584	-0.14343	0.246908
Q16774-2	GUK1	3.23821	-0.864009	-0.143281	0.425997
O75175	CNOT3	3.27193	-0.918721	-0.142855	0.399239
Q9Y314	NOSIP	3.21294	-0.512563	-0.142738	0.629485
Q9HB40	SCPEP1	3.16706	-0.777977	-0.142712	0.470806
Q8WYQ5-1	DGCR8	3.18627	-1.36309	-0.142621	0.229443
Q96QZ7	MAGI1	3.21481	-1.22616	-0.142568	0.273246
P61247	RPS3A	3.26296	-1.21955	-0.142466	0.275542
Q9ULK4	MED23	3.13073	-0.344831	-0.142131	0.743864
Q969Q6-1	PPP2R3C	3.15928	-1.21911	-0.142122	0.275694
A0JNW5-1	UHRF1BP1L	3.12349	-1.41332	-0.141935	0.215072
O75817	POP7	3.23228	-0.609327	-0.141851	0.568195
P46779	RPL28	3.15277	-1.17635	-0.14184	0.290964
Q9UHK0	NUFIP1	2.99918	-0.3623	-0.141758	0.731527
Q14693-1	LPIN1	3.18276	-1.02133	-0.141701	0.352667
Q14CS0	UBXN2B	3.02437	-0.791266	-0.141666	0.463667
Q9HCD5	NCOA5	3.22432	-1.59165	-0.141651	0.170662
Q15003	NCAPH	3.21842	-1.82769	-0.141536	0.125461
Q9Y2S7	POLDIP2	3.18939	-1.02921	-0.141532	0.349285
P04049	RAF1	3.25777	-0.858502	-0.141513	0.428765
O75794	CDC123	3.15221	-0.835575	-0.141503	0.440437
Q15390	MTFR1	3.13312	-0.369377	-0.14147	0.726554
Q14BN4	SLMAP	3.13365	-0.68645	-0.141172	0.52212
P28331-1	NDUFS1	3.13991	-1.02753	-0.140699	0.350003
P26374	CHML	3.23841	-1.86973	-0.140694	0.118778
Q9Y2H2-1	INPP5F	3.12967	-0.548663	-0.140636	0.606184
P24534	EEF1B2	3.12454	-1.40279	-0.140595	0.218013
O00213	APBB1	3.19783	-1.02583	-0.140554	0.350731
Q8N680	ZBTB2	3.23684	-0.851009	-0.140539	0.432553
Q14517	FAT1	3.07097	-0.424413	-0.140237	0.688418
Q9BX68	HINT2	3.21232	-0.426069	-0.140203	0.687286
Q7LBC6-1	KDM3B	3.18582	-1.73928	-0.140058	0.140785
Q9HC52	CBX8	3.20137	-0.883307	-0.14005	0.416405
Q16720-1	ATP2B3	3.19421	-0.494214	-0.139643	0.64152
Q9BUB4	ADAT1	3.18978	-1.02733	-0.139637	0.350089
Q8NCN5	PDPR	3.14532	-2.0435	-0.139415	0.0948102
Q9Y4E6-1	WDR7	3.20305	-1.28298	-0.139229	0.25422
P51858	HDGF	3.17418	-1.13085	-0.139171	0.308029
Q15532	SS18	3.19868	-0.383757	-0.139085	0.716498
Q9H1Z4	WDR13	3.14866	-0.815222	-0.139026	0.450997
Q9NV66	TYW1	3.1212	-0.5253	-0.139023	0.621206
P62753	RPS6	3.24736	-0.489667	-0.138897	0.644522
Q92572	AP3S1	3.2423	-1.87209	-0.138857	0.118414
Q9Y2G0	EFR3B	3.10703	-0.559812	-0.138792	0.59909
Q92674	CENPI	2.93736	-0.272347	-0.138583	0.795942
Q96IZ0	PAWR	3.06851	-0.565082	-0.138553	0.595755
Q9Y5E7	PCDHB2	3.2296	-0.305054	-0.13837	0.772274
Q96C19	EFHD2	3.21671	-1.37258	-0.13825	0.226661
Q9UI15	TAGLN3	3.13639	-1.01394	-0.138165	0.355866
Q9Y3D9	MRPS23	3.20983	-1.35896	-0.138143	0.230665
O43847-1	NRD1; NRDC	3.03813	-1.2605	-0.137945	0.261599
P21333-2	FLNA	3.27652	-1.79573	-0.137815	0.130797
Q15648	MED1	3.19184	-1.21082	-0.137507	0.278598
P38571	LIPA	3.15429	-1.10672	-0.137431	0.317426
P49770	EIF2B2	3.19451	-1.02132	-0.137151	0.352673
Q92997	DVL3	3.19894	-0.734198	-0.137004	0.494886
Q92576-1	PHF3	3.11558	-0.899938	-0.136889	0.408273
Q8IWR0	ZC3H7A	3.17433	-0.390929	-0.136877	0.711505
P06753-2	TPM3	3.197	-0.954593	-0.136839	0.382425
P46060	RANGAP1	3.10896	-1.33234	-0.136805	0.238678
O15111	CHUK	3.08747	-0.80787	-0.136346	0.454858
Q92888-1	ARHGEF1	3.21356	-0.758039	-0.136054	0.481667
P50479-1	PDLIM4	3.15188	-1.21856	-0.136004	0.275886
Q7Z3C6	ATG9A	3.13111	-0.726322	-0.135924	0.499309
Q9UQR1	ZNF148	3.15733	-0.946162	-0.13589	0.386325
O43318	MAP3K7	3.18688	-1.35809	-0.135706	0.230922
Q9UPQ3-1	AGAP1	3.2116	-0.687873	-0.135667	0.521293
Q96JQ2	CLMN	3.08048	-0.486542	-0.135478	0.646589
Q9NRN7	AASDHPPT	3.22444	-2.14662	-0.135419	0.0830217
Q9BVK6	TMED9	3.18053	-0.694923	-0.135187	0.517213
Q9Y450-1	HBS1L	3.09087	-0.863513	-0.134805	0.426245
Q86V15-1	CASZ1	3.20904	-0.546959	-0.134447	0.607272
Q8IZQ1-1	WDFY3	3.18852	-1.30627	-0.134373	0.246774
P52948-1	NUP98	3.14632	-1.04185	-0.134331	0.343913
Q9BYG3	MKI67IP; NIFK	3.02068	-0.602729	-0.134322	0.572254
Q9GZR7	DDX24	3.28699	-1.2279	-0.134311	0.272645
Q9Y4E8	USP15	3.20455	-1.0221	-0.134274	0.352335
Q3KRA9-1	ALKBH6	3.30488	-0.507852	-0.134157	0.632563
P78316	NOP14	3.15885	-1.24538	-0.13389	0.266673
Q14CX7-1	NAA25	3.28431	-0.798372	-0.133853	0.459882
Q9UJX2-1	CDC23	3.208	-0.851694	-0.133822	0.432206
Q96PU8	QKI	3.25679	-0.631177	-0.13371	0.554884
O75582-1	RPS6KA5	3.15199	-0.909371	-0.133244	0.403716
Q15814	TBCC	3.13401	-0.496724	-0.132905	0.639866
P49336	CDK8	3.18302	-0.80821	-0.132788	0.454679
Q16537	PPP2R5E	3.20672	-0.869973	-0.132766	0.423014
Q86XP3-1	DDX42	3.2279	-1.1577	-0.132557	0.297857
Q53FA7-1	TP53I3	3.12307	-0.612403	-0.132481	0.566309
Q9NSI6-2	BRWD1	3.04751	-0.575221	-0.132296	0.589369
P15531	NME1	3.11432	-0.730663	-0.132109	0.496868
Q13620-1	CUL4B	3.24754	-1.63545	-0.132014	0.161197
Q6UXN9	WDR82	3.28714	-0.668896	-0.131613	0.532382
Q9UBS8-1	RNF14	3.09482	-0.449783	-0.131385	0.671174
O14933	UBE2L6	3.12363	-0.671289	-0.131148	0.530975
O60518	RANBP6	3.31232	-0.696077	-0.130792	0.516548
O60256-1	PRPSAP2	3.22215	-0.881442	-0.130543	0.417324
Q9NVR5	DNAAF2	3.13469	-0.959296	-0.130497	0.380264
Q96DI7	SNRNP40	3.06329	-0.49913	-0.130465	0.638283
O15504	NUPL2	2.96877	-0.474418	-0.130184	0.654644
Q13823	GNL2	3.19257	-1.09984	-0.130109	0.320148
Q9BTE3-1	MCMBP	3.12889	-1.15668	-0.129872	0.298239
Q8N2C7-1	UNC80	3.45365	-0.228911	-0.129215	0.827754
Q5SGD2-1	PPM1L	3.14989	-1.09058	-0.129188	0.32385
Q15742-1	NAB2	3.19051	-0.811541	-0.128638	0.452927
Q9BRP8	WIBG; PYM1	3.26626	-0.626014	-0.128373	0.558011
P19388	POLR2E	3.14998	-0.680052	-0.128274	0.525845
P42696	RBM34	3.23672	-0.47686	-0.12822	0.653017
Q96N46	TTC14	3.09768	-0.54756	-0.127985	0.606888
O14976	GAK	3.15295	-0.613006	-0.127859	0.56594
Q8N4L2	TMEM55A; PIP4P2	3.15644	-0.546995	-0.127679	0.607249
Q9Y6A5	TACC3	3.15918	-1.4779	-0.127464	0.197841
Q5TGY3	AHDC1	3.04363	-0.55381	-0.127434	0.602903
Q7LG56-1	RRM2B	3.23307	-0.579069	-0.127302	0.586956
Q7Z392	TRAPPC11	3.14978	-1.21672	-0.127277	0.276531
Q9NQ84-1	GPRC5C	3.24249	-0.679617	-0.12723	0.526099
Q96EA4	SPDL1	3.15713	-1.1756	-0.127183	0.291239
Q92777-1	SYN2	3.29163	-0.688533	-0.127049	0.520911
O60447	EVI5	3.18739	-0.329852	-0.126988	0.754512
Q96J01	THOC3	3.20753	-1.01708	-0.126978	0.354506
P23526-1	AHCY	3.20438	-1.88312	-0.126878	0.116726
P49585	PCYT1A	3.24472	-1.03063	-0.126625	0.348679
Q8WVV9	HNRNPLL; HNRPLL	3.18759	-0.79551	-0.12648	0.461404
P31153	MAT2A	3.19751	-0.963519	-0.126355	0.378331
Q9BR76	CORO1B	3.22733	-1.44147	-0.126346	0.207393
O60508	CDC40	3.26671	-0.673217	-0.126342	0.529844
Q9C091	GREB1L	3.16083	-0.63177	-0.126311	0.554526
P60983	GMFB	3.21074	-1.48574	-0.125953	0.19584
Q9BVS4	RIOK2	3.16711	-0.880209	-0.125811	0.417933
P63151	PPP2R2A	3.10075	-1.07293	-0.1253	0.330999
Q9H9C1-1	VIPAS39	3.20209	-0.721324	-0.125139	0.50213
Q9BWU0	SLC4A1AP	3.16484	-0.688207	-0.125132	0.521099
Q8IXI2-3	RHOT1	3.13344	-0.312023	-0.124746	0.767265
Q15046	KARS	3.23062	-1.52479	-0.124663	0.186165
P48147	PREP	3.23248	-0.974274	-0.124431	0.373445
Q96HY7	DHTKD1	3.277	-0.922026	-0.124316	0.397665
P19404	NDUFV2	3.18982	-1.45239	-0.123941	0.204485
Q05BV3-1	EML5	3.16942	-1.0413	-0.123749	0.344145
P59998	ARPC4	3.26103	-0.888079	-0.123637	0.414058
Q5T440	IBA57	3.13542	-0.72466	-0.123599	0.500246
P22307-1	SCP2	3.08723	-1.10419	-0.123589	0.318425
Q9NP61-1	ARFGAP3	3.23277	-0.73716	-0.123541	0.49323
Q9BQ89	FAM110A	3.15697	-0.786498	-0.123435	0.466219
O75190	DNAJB6	3.20558	-0.764532	-0.123165	0.47811
Q7Z6L1-1	TECPR1	3.25148	-0.850319	-0.123041	0.432903
Q9H2M9	RAB3GAP2	3.16679	-2.02734	-0.122896	0.0968113
Q9Y296	TRAPPC4	3.19045	-0.346558	-0.122739	0.74264
Q8IV36	HID1	3.1824	-0.564504	-0.122723	0.59612
Q9NSP4-1	CENPM	3.1369	-0.287157	-0.122579	0.785192
Q9NXW2-1	DNAJB12	3.09522	-0.996084	-0.122498	0.363694
Q9UG63	ABCF2	3.09353	-2.30153	-0.122452	0.0681326
Q99627-1	COPS8	3.23376	-0.922413	-0.122362	0.397482
Q86UW6	N4BP2	3.1404	-0.665622	-0.122089	0.534311
Q01664	TFAP4	3.18419	-0.939341	-0.121769	0.389503
Q9UPZ3	HPS5	3.22979	-0.451701	-0.121383	0.669879
P05114	HMGN1	3.46159	-0.342422	-0.121361	0.745572
Q969T7	NT5C3B; NT5C3L	3.17079	-0.356141	-0.121251	0.735866
Q96HW7	INTS4	2.94977	-0.311659	-0.121246	0.767527
Q9UBF2	COPG2	3.16694	-1.2932	-0.121146	0.250927
P84098	RPL19	3.10054	-0.675398	-0.121014	0.528565
Q8N6T7-1	SIRT6	3.1776	-0.507093	-0.120732	0.63306
P42785-1	PRCP	3.1642	-1.04878	-0.120651	0.340998
Q969J3-1	LOH12CR1; BORCS5	3.19834	-0.454632	-0.12052	0.667903
O14686-1	KMT2D; MLL2	3.20445	-1.56252	-0.120218	0.177256
O75940	SMNDC1	3.15324	-0.896709	-0.120071	0.409842
Q9Y3A5	SBDS	3.02743	-0.75561	-0.12004	0.483002
P46109	CRKL	3.08049	-0.451901	-0.119755	0.669744
Q14498-1	RBM39	3.21844	-0.894519	-0.119733	0.410909
Q9BVI0	PHF20	3.07003	-0.348715	-0.119541	0.741113
Q9H000	MKRN2	3.1277	-0.694594	-0.1195	0.517403
P06746	POLB	3.1413	-0.69	-0.119392	0.52006
Q6GQQ9-1	OTUD7B	3.20759	-0.301319	-0.119066	0.774963
O43633	CHMP2A	3.18623	-0.833645	-0.119024	0.44143
O94830	DDHD2	3.21301	-1.15	-0.11897	0.300745
Q12765	SCRN1	3.13489	-0.774882	-0.118869	0.47248
P84090	ERH	3.28779	-1.28278	-0.118592	0.254283
Q15544	TAF11	3.08903	-0.472104	-0.118589	0.656187
Q9HCN4	GPN1	3.10865	-0.769775	-0.118562	0.475252
O95202-1	LETM1	3.07775	-0.395896	-0.118415	0.708058
Q9NXR8-1	ING3	3.10355	-0.87829	-0.118201	0.418882
Q9NRS6	SNX15	3.15164	-0.625014	-0.118061	0.558618
Q8NEW0	SLC30A7	3.18392	-0.537367	-0.117669	0.61342
O94979	SEC31A	3.1879	-0.716519	-0.11743	0.504853
Q9NQW7-3	XPNPEP1	3.17198	-1.35488	-0.117209	0.231875
Q14674-1	ESPL1	3.1173	-0.986192	-0.116744	0.36809
P54920	NAPA	3.2271	-1.07134	-0.116727	0.33165
Q9ULU4-7	ZMYND8	3.18595	-0.73989	-0.116517	0.491707
Q8N9N2-2	ASCC1	3.21535	-0.698394	-0.116363	0.515213
Q9BUA3	C11orf84	3.16233	-0.904187	-0.116108	0.406215
Q9Y2K9	STXBP5L	3.17753	-0.338569	-0.11609	0.748307
Q8TAD8	SNIP1	3.25196	-0.714861	-0.115724	0.505794
Q96PZ0	PUS7	3.16898	-0.961463	-0.115663	0.379271
Q4G0A6	FAM188B; MINDY4	3.06247	-0.489517	-0.115603	0.644621
Q6NXT1-1	ANKRD54	3.03067	-0.591218	-0.115593	0.579378
Q9BQ69	MACROD1	3.14653	-0.750131	-0.115592	0.486023
P60842	EIF4A1	3.18696	-2.6919	-0.115543	0.0419268
P54727	RAD23B	3.20434	-0.671432	-0.11523	0.530891
Q13427	PPIG	3.19719	-0.810591	-0.114879	0.453426
Q9Y2R0	COA3	2.92203	-0.426343	-0.114815	0.687098
P53384	NUBP1	3.2051	-0.736395	-0.11475	0.493657
Q92585	MAML1	3.09808	-0.388918	-0.114721	0.712903
Q92922	SMARCC1	3.14641	-0.910543	-0.11439	0.403152
P11413-1	G6PD	3.20639	-0.996573	-0.114319	0.363477
Q13098-7	GPS1	3.1301	-1.1994	-0.114088	0.282643
P29374-1	ARID4A	3.15301	-0.796978	-0.113401	0.460623
Q96CS3	FAF2	3.13179	-0.697206	-0.113376	0.515897
O15231-1	ZNF185	3.12251	-0.434175	-0.113338	0.681756
Q9Y6R4-1	MAP3K4	3.18412	-1.22551	-0.113324	0.273473
P50991	CCT4	3.22177	-1.42333	-0.11327	0.21231
P40818	USP8	3.19191	-0.625917	-0.113186	0.55807
O95363	FARS2	3.28278	-0.752719	-0.113151	0.484595
Q8WVM7	STAG1	3.20595	-1.91046	-0.112968	0.11265
Q96P48-6	ARAP1	3.18091	-1.30022	-0.112903	0.248689
Q17RY0-1	CPEB4	3.2138	-0.63802	-0.112869	0.550757
Q9H4L4	SENP3	3.25731	-0.93679	-0.112864	0.390698
P54278	PMS2; LOC107984056	3.13291	-0.484283	-0.11283	0.648086
Q9H307	PNN	3.21039	-1.049	-0.112765	0.340904
Q99543-1	DNAJC2	2.96161	-0.656058	-0.112673	0.539973
P46379-1	BAG6	3.17563	-1.36841	-0.112525	0.22788
P52434	POLR2H	3.17796	-0.74154	-0.112447	0.490788
Q9UI43	FTSJ2; MRM2	3.17498	-0.507959	-0.111898	0.632493
Q14444-1	CAPRIN1	3.23707	-0.753439	-0.111829	0.484198
Q9BVM2	DPCD	3.1885	-0.491212	-0.111703	0.643501
Q5VT25-1	CDC42BPA	3.21889	-0.46967	-0.111535	0.657813
Q49A26-2	GLYR1	3.18365	-0.294425	-0.111469	0.779937
Q8WU76-1	SCFD2	3.2033	-0.973224	-0.111314	0.37392
Q8IY67-2	RAVER1	3.35552	-0.30906	-0.111267	0.769393
Q6Y288	B3GALTL; B3GLCT	3.25518	-0.463491	-0.111097	0.661949
Q6ZSZ5	ARHGEF18	3.18249	-1.44785	-0.110943	0.205689
Q8NEZ4	KMT2C; MLL3	3.19552	-0.581005	-0.110906	0.585744
P10768	ESD	3.30051	-0.853067	-0.1108	0.43151
Q9NRV9	HEBP1	2.99692	-0.444264	-0.110246	0.674906
O14925	TIMM23	3.16228	-0.34459	-0.110087	0.744034
Q6FI81-1	CIAPIN1	3.18774	-1.77758	-0.109906	0.133927
Q96MU7-1	YTHDC1	3.18454	-0.61144	-0.109803	0.566899
Q9BXW6-1	OSBPL1A	3.23317	-0.628183	-0.109682	0.556696
Q14168-1	MPP2	3.17631	-0.366572	-0.109602	0.728523
P09661	SNRPA1	3.10941	-0.414179	-0.109574	0.695435
P49754	VPS41	3.20258	-0.515505	-0.109471	0.627567
Q16658	FSCN1	3.21646	-1.39301	-0.109435	0.220779
Q9ULR0-1	ISY1-RAB43; RAB43; ISY1	3.29649	-0.856721	-0.109359	0.429663
Q8NC60	NOA1	3.20118	-0.814099	-0.109269	0.451585
Q06124	PTPN11	3.17733	-0.817988	-0.108976	0.449551
Q6IA86-1	ELP2	3.18876	-0.926738	-0.108937	0.395431
Q96FJ0	STAMBPL1	3.05736	-0.27571	-0.108784	0.793496
P60866	RPS20	3.25012	-0.669634	-0.10862	0.531948
Q9ULG1	INO80	3.21619	-0.410966	-0.108545	0.697646
Q15424-1	SAFB	3.25588	-1.13826	-0.108454	0.305191
P78364	PHC1	3.13563	-0.608925	-0.108383	0.568442
Q9NZ53-1	PODXL2	3.18524	-0.922805	-0.108328	0.397295
P42898	MTHFR	3.16242	-0.553474	-0.108232	0.603117
Q9H4W6	EBF3	3.14945	-0.673193	-0.108176	0.529858
Q9NQ66-1	PLCB1	3.20718	-0.947753	-0.108067	0.385587
Q6PML9	SLC30A9	3.18034	-0.729415	-0.108047	0.497569
Q7Z4G4	TRMT11	3.02298	-0.269498	-0.107978	0.798016
Q8NA72	POC5	3.15387	-0.459446	-0.107929	0.664664
O60242	BAI3; ADGRB3	3.28086	-0.303635	-0.107618	0.773295
Q5JTH9-1	RRP12	3.09528	-0.755082	-0.107597	0.483293
O75570	MTRF1	3.14595	-0.325656	-0.107427	0.757505
Q8IZM8	ZNF654	3.05228	-0.302146	-0.107221	0.774367
Q9ULM3	YEATS2	3.12613	-0.582724	-0.106995	0.58467
Q49AR2-1	C5orf22	3.29238	-0.408972	-0.106967	0.699019
Q96NC0	ZMAT2	3.11142	-0.935469	-0.106883	0.391317
Q96GW9	MARS2	3.1485	-0.469066	-0.106812	0.658217
O75116	ROCK2	3.27718	-1.32159	-0.106697	0.241985
O75953	DNAJB5	3.16479	-0.675016	-0.106608	0.528789
Q9BXK1	KLF16	3.06219	-0.461415	-0.10654	0.663342
Q9BTV5	FSD1	3.30075	-0.489118	-0.106327	0.644885
P28074-1	PSMB5	3.16792	-0.694349	-0.106192	0.517545
Q9H9Y6-1	POLR1B	3.23371	-0.742574	-0.106106	0.490213
Q8WXG6-2	MADD	3.14202	-1.07574	-0.106085	0.329852
Q7L311	ARMCX2	3.12381	-0.893598	-0.105703	0.411358
Q8N1G0	ZNF687	3.14833	-0.743565	-0.105565	0.489662
Q8WXE1	ATRIP	3.13711	-0.754203	-0.105391	0.483777
O95302	FKBP9	3.23148	-0.863063	-0.10516	0.426472
O75970	MPDZ	3.17543	-1.1137	-0.104992	0.314683
P61916	NPC2	3.14654	-0.890553	-0.104984	0.412846
Q15006	EMC2	3.21337	-0.68327	-0.104977	0.523969
Q96HD1-1	CRELD1	2.93789	-0.298263	-0.104873	0.777166
O75494-3	SRSF10; LOC100996657	3.2647	-0.505479	-0.104841	0.634116
O75448	MED24	3.06479	-0.527155	-0.10482	0.620005
O95486-1	SEC24A	3.18371	-0.548804	-0.10479	0.606094
P46821	MAP1B	3.23821	-2.23932	-0.1047	0.073739
Q7L804	RAB11FIP2	3.27674	-0.635285	-0.104673	0.552404
O94842	TOX4	3.19595	-0.393081	-0.10437	0.71001
O15226	NKRF	3.28291	-0.445873	-0.104025	0.673817
P16949-1	STMN1	3.12916	-0.912227	-0.103915	0.402344
P15170-3	GSPT1	3.16305	-0.804125	-0.103623	0.456834
Q07343-3	PDE4B	3.20724	-1.10456	-0.103617	0.318278
Q9UKG1	APPL1	3.18191	-0.549343	-0.10353	0.60575
P49915	GMPS	3.18374	-1.82631	-0.103208	0.125687
Q9HBF4-1	ZFYVE1	3.12044	-0.513408	-0.103189	0.628934
Q96QR8	PURB	3.22578	-1.01084	-0.103117	0.357215
Q9NY27	PPP4R2	3.23348	-0.918992	-0.102842	0.39911
Q13616	CUL1	3.18515	-1.63694	-0.102803	0.160884
P33992	MCM5	3.14491	-1.35745	-0.102789	0.231111
O95405-1	ZFYVE9	3.08508	-0.998131	-0.102773	0.36279
Q6P2E9-1	EDC4	3.19032	-0.886305	-0.102264	0.41493
Q8N4B1	FAM109A	3.20051	-0.458422	-0.102043	0.665352
Q5T1V6	DDX59	3.17895	-1.17171	-0.101998	0.292667
Q9NX38	FAM206A	3.11392	-0.642402	-0.101972	0.548124
Q7Z6J9	TSEN54	3.20491	-0.635857	-0.101951	0.552059
Q96RG2-1	PASK	3.16398	-0.967836	-0.10188	0.376364
Q9H8W3	FAM204A	3.20078	-0.719037	-0.101353	0.503424
Q99470	SDF2	3.24822	-0.411046	-0.10121	0.697591
Q8NF91	SYNE1	3.11246	-0.445979	-0.10085	0.673745
Q7Z3B4	NUP54	3.16771	-0.527557	-0.100809	0.619746
O75044	SRGAP2	3.17838	-0.876971	-0.100697	0.419535
Q9NQH7-1	XPNPEP3	3.20773	-0.911964	-0.100547	0.40247
O75153	CLUH; KIAA0664	3.1565	-2.32786	-0.100489	0.0658985
Q9P275	USP36	3.17445	-0.742073	-0.100448	0.490492
Q96GM8	TOE1	3.16892	-0.765438	-0.100283	0.477615
Q8TC07-2	TBC1D15	3.14731	-0.926474	-0.10023	0.395556
P09455-1	RBP1	3.135	-0.969297	-0.100067	0.3757
P46926	GNPDA1	3.18983	-0.87273	-0.0995929	0.421641
P55327	TPD52	3.06143	-0.339274	-0.0995677	0.747807
Q53EP0	FNDC3B	3.06702	-0.495051	-0.0995597	0.640968
Q15058	KIF14	3.00328	-0.392927	-0.0993116	0.710118
Q8TB72-3	PUM2	3.22706	-0.454509	-0.0992874	0.667986
P98170	XIAP	3.18352	-0.460388	-0.0991854	0.664032
Q9Y6W3	CAPN7	3.15931	-0.891478	-0.099152	0.412394
Q6PCB5-1	RSBN1L	3.15044	-0.567122	-0.0990881	0.594466
Q01484	ANK2	3.13678	-1.63015	-0.0988058	0.162314
O43242	PSMD3	3.2299	-1.36429	-0.0987511	0.22909
Q9UKV8	AGO2; EIF2C2	3.18853	-1.29006	-0.0986174	0.251936
Q96JB5	CDK5RAP3	2.97886	-0.174573	-0.0983347	0.868074
Q9UQ90	SPG7	3.10216	-0.564761	-0.0982845	0.595958
P42126	ECI1	3.29373	-0.672822	-0.0982333	0.530076
Q9UHX1-2	PUF60	3.19544	-1.17607	-0.098093	0.291069
Q9H3K2	GHITM	3.21459	-0.27202	-0.0977292	0.79618
P52739	ZNF131	3.1985	-0.47336	-0.0975098	0.655349
Q8ND30	PPFIBP2	3.17173	-0.472723	-0.0973772	0.655774
P54577	YARS	3.24887	-1.35526	-0.0972257	0.231763
Q8IWZ3-6	ANKHD1-EIF4EBP3; ANKHD1	3.06559	-1.1227	-0.0972077	0.311176
Q96T23	RSF1	3.14367	-1.97135	-0.0968894	0.10409
Q9NVP1	DDX18	3.15702	-0.974731	-0.0968375	0.373238
O75365-1	PTP4A3	3.11416	-0.374449	-0.096706	0.722999
Q8N8L6	ARL10	3.17117	-0.180994	-0.0966723	0.863283
Q7Z3E2	C10orf118; CCDC186	3.06805	-0.613287	-0.0963928	0.565768
Q5BJF6	ODF2	3.37503	-0.276645	-0.0962457	0.792817
Q96PU4-1	UHRF2	3.15758	-0.665705	-0.0955791	0.534263
Q12824-1	SMARCB1	3.13719	-0.432194	-0.0955436	0.683105
Q86VV8	RTTN	3.12019	-0.378143	-0.0953521	0.720416
P50897	PPT1	3.11974	-0.415405	-0.0952635	0.694593
P54259	ATN1	3.14696	-0.938084	-0.0952484	0.390092
O75530	EED	3.33921	-0.274611	-0.0950823	0.794295
P35237	SERPINB6	3.28396	-0.868602	-0.0949967	0.423699
Q8WVC0-1	LEO1	3.1671	-0.419184	-0.0949872	0.691999
Q9Y3L3-1	SH3BP1	3.25523	-0.655222	-0.0949835	0.54047
O43399	TPD52L2	3.28756	-0.841698	-0.0949325	0.437296
Q7L592	NDUFAF7	3.22739	-0.794908	-0.0947862	0.461724
Q14004-1	CDK13	3.16694	-0.50573	-0.0946438	0.633952
P11274-1	BCR	3.24762	-1.04505	-0.0946059	0.342564
Q8IX90	SKA3	3.28163	-0.528729	-0.0945042	0.618988
P18433	PTPRA	3.17553	-0.430685	-0.0942039	0.684134
Q96E22	NUS1	2.8946	-0.300729	-0.0940141	0.775388
Q9H267	VPS33B	3.15634	-0.961369	-0.0938187	0.379314
P46736	BRCC3	3.18084	-0.485929	-0.0937587	0.646995
Q13546	RIPK1	3.14819	-0.472872	-0.0936464	0.655675
Q96CT7	CCDC124	3.19817	-0.803707	-0.0936301	0.457055
O75165	DNAJC13	3.17935	-1.17435	-0.0936033	0.291698
Q8N8R7	ARL14EP	3.15929	-0.494501	-0.0934476	0.64133
Q15276	RABEP1	3.23896	-0.952189	-0.0934161	0.383534
P29375-1	KDM5A	3.10368	-0.820965	-0.093365	0.447999
Q9UNW9	NOVA2	3.29176	-0.37482	-0.0932997	0.72274
Q9NQT4	EXOSC5	3.1429	-0.741091	-0.0931276	0.491038
P49720	PSMB3	3.24076	-0.404648	-0.0927742	0.702002
O75937	DNAJC8	3.23262	-1.22207	-0.0926425	0.274666
Q9BQE5	APOL2	3.24962	-0.327197	-0.0925507	0.756405
Q9P2D6	FAM135A	3.19101	-0.290854	-0.0920862	0.782517
Q10471	GALNT2	3.16235	-0.634332	-0.0917888	0.552979
Q9H269	VPS16	3.17061	-0.908272	-0.0916922	0.404245
Q9Y2V2	CARHSP1	3.15281	-0.698192	-0.0916458	0.515329
P49321-2	NASP	3.20925	-1.10182	-0.0916283	0.319363
P07305	H1F0	3.20344	-1.01663	-0.0913754	0.354699
Q96QB1-2	DLC1	3.01456	-0.363422	-0.0912026	0.730737
O94923	GLCE	3.20642	-0.698558	-0.0907853	0.515119
Q5VT06	CEP350	3.17737	-0.805179	-0.0907374	0.456277
Q9H488-1	POFUT1	3.17995	-0.410321	-0.0906839	0.69809
Q96PU5	NEDD4L	3.16215	-0.36524	-0.0906598	0.729459
Q5SRE5	NUP188	3.25949	-0.752501	-0.0905203	0.484715
Q9ULL5-3	PRR12	3.19784	-0.781245	-0.0902505	0.469043
Q9H8Y5	ANKZF1	3.05185	-0.439137	-0.0901678	0.678383
Q9BV73-1	CEP250	3.14502	-0.495969	-0.0897029	0.640364
Q53GS9	USP39	3.17952	-0.442988	-0.0896891	0.675771
Q99523	SORT1	3.09605	-0.775404	-0.089665	0.472198
Q9HB21-1	PLEKHA1	3.24024	-0.33828	-0.0895244	0.748513
Q9NTX5	ECHDC1	3.15371	-0.468458	-0.0895141	0.658623
P57678	GEMIN4	3.25013	-0.555849	-0.0894916	0.601606
Q9BY44-1	EIF2A	3.29512	-0.237414	-0.0893898	0.821495
Q96RY7	IFT140	3.09216	-0.238962	-0.0891162	0.820357
P62913	RPL11	3.18349	-0.316692	-0.0891081	0.763917
Q13492-1	PICALM	3.17524	-1.66727	-0.0890539	0.154646
Q9P2K3-3	RCOR3	3.17003	-0.853294	-0.0890006	0.431395
Q9UQB8-6	BAIAP2	3.12788	-0.212739	-0.0888168	0.839699
Q8IUQ0	CLVS1	3.17276	-0.340524	-0.0887267	0.746919
Q5TB80	KIAA1009; CEP162	3.14452	-0.61873	-0.0886212	0.562442
Q6P087	RPUSD3	3.25626	-0.547691	-0.0884237	0.606805
Q9UQR0	SCML2	3.05196	-0.441792	-0.0882338	0.676582
Q9Y266	NUDC	3.24895	-1.03847	-0.0881317	0.345341
Q9BXW7	CECR5; HDHD5	3.25882	-0.826009	-0.0879995	0.445377
Q9UHD8-1	SEPT9	3.17956	-0.88278	-0.0879632	0.416664
Q96N67	DOCK7	3.22216	-1.19719	-0.0878387	0.283431
Q9H270	VPS11	3.21362	-0.990151	-0.0877093	0.366326
Q96PV6-2	LENG8	3.10729	-0.393766	-0.0877034	0.709535
Q9ULC4-1	MCTS1	3.15993	-0.431321	-0.0876016	0.683701
Q5UCC4-1	EMC10	3.14379	-0.670036	-0.087447	0.531712
Q9BVC3	DSCC1	3.10374	-0.638868	-0.0873323	0.550247
Q9GZV4	EIF5A2	2.82207	-0.175674	-0.0871776	0.867252
Q9UKD2	MRTO4	3.15188	-0.766803	-0.0870908	0.476871
P31350-1	RRM2	3.17024	-0.855511	-0.0868991	0.430274
Q9UK99	FBXO3	2.58418	-0.140177	-0.086881	0.89384
Q9Y262	EIF3L	3.20964	-1.57837	-0.0868298	0.173637
Q9UPN9-1	TRIM33	3.22041	-0.745661	-0.086749	0.488499
Q6ZRP7	QSOX2	3.16084	-0.244822	-0.0865854	0.816054
P22695	UQCRC2	3.14572	-0.634103	-0.0865685	0.553117
P52732	KIF11	3.01736	-0.684863	-0.0861422	0.523042
Q14157-5	UBAP2L	3.22987	-1.17444	-0.0859753	0.291667
Q8N5C7-1	DTWD1	3.17047	-0.658073	-0.0858714	0.538777
Q9NYB9-2	ABI2	3.18216	-0.338066	-0.0857862	0.748664
Q92522	H1FX	3.22766	-0.331128	-0.0857307	0.753602
P39023	RPL3	3.20705	-1.08711	-0.0856316	0.325244
O95239-1	KIF4A	3.15237	-1.28118	-0.0856049	0.254801
Q15911-1	ZFHX3	3.15885	-0.511831	-0.0853523	0.629963
Q15573-1	TAF1A	3.03597	-0.496318	-0.0851327	0.640133
Q13464	ROCK1	3.19894	-1.18193	-0.0850915	0.288933
Q05048	CSTF1	3.19307	-0.579942	-0.0848915	0.58641
Q9P2F5-1	STOX2	3.12998	-0.384195	-0.0848706	0.716192
Q9NT62	ATG3	3.27038	-0.309998	-0.0847753	0.768719
O60502	MGEA5	3.25189	-0.72636	-0.0846879	0.499288
P57071	PRDM15	3.11621	-0.244643	-0.0846663	0.816185
Q5TA45-1	CPSF3L; INTS11	3.1908	-0.875937	-0.0845095	0.420048
Q03164	KMT2A; MLL	3.13429	-0.405361	-0.0843212	0.70151
Q9H7P6	FAM125B; MVB12B	3.23785	-0.445923	-0.0842495	0.673783
Q96HE7	ERO1L; ERO1A	3.18014	-0.342588	-0.0841664	0.745454
Q9NQX3	GPHN	3.36659	-0.319709	-0.0840234	0.761757
Q86VQ1	GLCCI1	3.06293	-0.22657	-0.0838972	0.82948
Q4G0X4	KCTD21	3.16713	-0.406716	-0.0837113	0.700575
P33991	MCM4	3.11598	-0.992294	-0.08359	0.365373
Q8NHV4	NEDD1	3.13719	-0.988959	-0.0835233	0.366856
Q9H9A6	LRRC40	3.21524	-0.729113	-0.0834707	0.497739
Q9Y4B6	VPRBP; DCAF1	3.21354	-0.929893	-0.0832374	0.393941
P42167	TMPO	2.97388	-0.616251	-0.0830371	0.563955
Q9NYU1	UGGT2	3.21389	-0.22779	-0.0830164	0.828581
Q8NEZ3-1	WDR19	3.18496	-0.38976	-0.0828456	0.712318
Q16514	TAF12	3.21089	-0.28708	-0.0827472	0.785248
Q5VUD6-1	FAM69B	3.21072	-0.244796	-0.082665	0.816073
Q99805	TM9SF2	3.14423	-0.43861	-0.0826261	0.678741
Q15437	SEC23B	3.1953	-0.621968	-0.0826052	0.56047
O75376-1	NCOR1	3.20007	-1.47977	-0.0824795	0.197361
P62899	RPL31	3.06514	-0.394547	-0.0823293	0.708993
P36871-1	PGM1	3.20473	-0.647075	-0.0822413	0.545326
P05455	SSB	3.19655	-0.781789	-0.0821487	0.46875
O75564	JRK	3.20618	-0.241845	-0.0821289	0.818239
Q15154-1	PCM1	3.27913	-0.676003	-0.0818057	0.528211
Q7RTS9-1	DYM	3.12527	-0.572506	-0.0817752	0.591075
Q9Y3B3-1	TMED7; TMED7-TICAM2	3.23734	-0.742859	-0.0811277	0.490055
Q9H8K7	C10orf88	3.08728	-0.53604	-0.0809857	0.614274
Q7Z3U7-1	MON2	3.17563	-1.1247	-0.080898	0.310402
Q9UBL3-1	ASH2L	3.19974	-0.64454	-0.0808532	0.546843
Q8IXM3	MRPL41	3.19195	-0.524095	-0.0807845	0.621987
P80303	NUCB2	3.22091	-0.532308	-0.0805288	0.616678
Q99436	PSMB7	3.14277	-0.43819	-0.0804279	0.679026
P07355	ANXA2	3.27334	-0.248873	-0.080286	0.813084
Q99816	TSG101	3.24328	-0.56883	-0.0798908	0.59339
Q6PD62	CTR9	3.16227	-0.771967	-0.0798708	0.474061
Q9BWG6-1	SCNM1; TNFAIP8L2-SCNM1	3.1895	-0.360598	-0.0798291	0.732724
Q13952-1	NFYC	3.23682	-0.218548	-0.079787	0.835403
Q9BQG2	NUDT12	3.25159	-0.494781	-0.0797811	0.641146
Q06265-1	EXOSC9	3.13722	-1.05024	-0.0797539	0.340383
Q9HCG8	CWC22	3.18559	-0.898214	-0.0794585	0.40911
P62906	RPL10A	3.20455	-0.435962	-0.0791392	0.680541
Q14690	PDCD11	3.24708	-1.34089	-0.0789792	0.236076
Q07666	KHDRBS1	3.19133	-0.679029	-0.0787069	0.526442
Q13769	THOC5	3.19533	-0.621742	-0.0787051	0.560608
Q96EZ8	MCRS1	3.24449	-0.338153	-0.0786546	0.748603
P51911	CNN1	3.1992	-0.434246	-0.0785365	0.681708
Q13107-1	USP4	3.17029	-0.579778	-0.0783412	0.586512
Q8IWT6	LRRC8A	3.06225	-0.21707	-0.0783388	0.836495
Q15061	WDR43	3.28781	-0.903311	-0.0782566	0.406639
P49643-1	PRIM2	3.1503	-0.533359	-0.077934	0.616
Q92664	GTF3A	3.15154	-0.422642	-0.0778155	0.689629
Q7Z569	BRAP	3.22124	-0.518428	-0.0777318	0.625665
O75569-1	PRKRA	2.7857	-0.221467	-0.0776076	0.833246
Q9H0G5	NSRP1	3.17132	-0.749293	-0.0775555	0.486487
P17600	SYN1	3.23268	-0.776303	-0.0775418	0.471711
Q8N766-1	EMC1	3.08083	-0.51683	-0.0772116	0.626704
P16455	MGMT	3.16977	-0.483837	-0.0771816	0.648381
P17844	DDX5	3.1523	-1.12987	-0.0771349	0.308407
Q16611	BAK1	3.05567	-0.27863	-0.0771149	0.791375
Q9ULW3	ABT1	3.19598	-0.30352	-0.0769941	0.773378
P51610-4	HCFC1	3.22172	-1.49203	-0.0767608	0.194249
P17612	PRKACA	3.21507	-0.379408	-0.0766152	0.719532
Q16630	CPSF6	3.20439	-0.339408	-0.0764725	0.747711
P50453	SERPINB9	3.19452	-0.56878	-0.0763093	0.593421
Q8IXQ4	GPALPP1; KIAA1704	3.20611	-0.451372	-0.0762362	0.670101
Q6YN16	HSDL2	3.32532	-0.585016	-0.0761535	0.583239
P57081-1	WDR4	2.9849	-0.381068	-0.0760011	0.718373
O43172-1	PRPF4	3.19681	-0.679815	-0.0758777	0.525983
P29590-3	PML	3.20964	-0.759589	-0.0756703	0.480816
Q9BVG4	CXorf26; PBDC1	3.23067	-0.376261	-0.0756189	0.721732
P26232	CTNNA2	3.19112	-0.830204	-0.0754873	0.443205
O95613	PCNT	3.17877	-0.662675	-0.0752506	0.536052
Q8NB78-1	KDM1B	3.38602	-0.222072	-0.0752149	0.8328
O60825-1	PFKFB2	3.17075	-0.716658	-0.0750769	0.504773
Q16512-1	PKN1	3.15689	-0.538894	-0.0750634	0.612439
Q9P2M7-1	CGN	3.14125	-1.01126	-0.0750601	0.357034
Q14974	KPNB1	2.94044	-0.262055	-0.0749436	0.803442
Q16342-1	PDCD2	3.03028	-0.292712	-0.0747625	0.781174
Q5BKZ1	ZNF326	3.23238	-0.220053	-0.0747523	0.83429
Q9Y3F4	STRAP	3.14814	-1.03665	-0.074729	0.346115
Q9Y5B9	SUPT16H	3.22179	-1.1286	-0.0744828	0.308894
P48739	PITPNB	3.27063	-0.776882	-0.0743297	0.471398
P08243-1	ASNS	3.13564	-0.415185	-0.074164	0.694744
Q9BYG5	PARD6B	3.16678	-0.658801	-0.0741437	0.538345
Q8NB49-1	ATP11C	3.25393	-0.316932	-0.0739587	0.763746
O43752	STX6	3.22961	-0.316847	-0.0738875	0.763806
O75461-1	E2F6	3.1508	-0.407526	-0.0737104	0.700016
Q9Y5Q9	GTF3C3	3.25856	-0.423294	-0.0736961	0.689183
Q13619-1	CUL4A	3.18157	-0.854563	-0.0735488	0.430753
Q96AX1	VPS33A	3.18571	-0.551159	-0.0734885	0.604591
Q5VV41-1	ARHGEF16	3.10058	-0.216902	-0.0734208	0.836619
O95104	SCAF4	3.16118	-0.582697	-0.0730401	0.584687
P50213-1	IDH3A	3.2556	-0.521238	-0.0730352	0.623839
Q8NFG4-1	FLCN	3.21849	-0.435261	-0.072964	0.681017
Q8TDP1	RNASEH2C	3.11037	-0.486086	-0.072907	0.646891
P49257	LMAN1	3.10828	-0.410547	-0.0728462	0.697934
Q9UBW7	ZMYM2	3.18069	-0.46281	-0.0728146	0.662406
Q9BZE9	ASPSCR1	3.12763	-0.39755	-0.0725351	0.706911
Q13042	CDC16	3.18681	-0.439179	-0.0724548	0.678355
Q05084	ICA1	3.19047	-1.01527	-0.0723903	0.355291
Q9HC35	EML4	3.14437	-0.461499	-0.0722859	0.663286
P16220-1	CREB1	3.10908	-0.213082	-0.0721523	0.839444
P08670	VIM	3.14825	-0.515442	-0.0717432	0.627608
Q14683	SMC1A	3.18259	-0.936476	-0.0715941	0.390845
Q9UMY4-1	SNX12	3.1387	-0.511634	-0.0715051	0.630092
P62847-1	RPS24	3.21826	-0.866633	-0.0712009	0.424683
Q15131-1	CDK10	3.27364	-0.169069	-0.0711514	0.872185
P48059-3	LIMS1	3.19019	-0.50785	-0.0711289	0.632564
A1L020	MEX3A	3.13566	-0.394566	-0.0711119	0.70898
O95478	NSA2	3.15699	-0.198263	-0.0709839	0.850432
P49792	RANBP2	3.22133	-1.33467	-0.0709558	0.237965
O43143	DHX15	3.19033	-0.969706	-0.0708859	0.375514
O00291	HIP1	3.12576	-0.400524	-0.0704986	0.704852
P13984	GTF2F2	3.2068	-0.656952	-0.0704847	0.539442
O95391	SLU7	3.16477	-0.416766	-0.0704513	0.693658
P62333	PSMC6	3.25084	-0.423857	-0.0703705	0.688798
Q8TCU6-1	PREX1	3.18092	-0.329806	-0.0702472	0.754544
Q9H6H4-1	REEP4	3.1367	-0.515389	-0.0700339	0.627643
Q5T2R2-1	PDSS1	3.21507	-0.446327	-0.0700001	0.67351
Q96Q05	TRAPPC9	3.24705	-0.498157	-0.0699585	0.638923
Q12986	NFX1	3.11788	-0.544386	-0.0699295	0.608918
Q16595-1	FXN	3.28373	-1.23161	-0.0698906	0.271368
O43913	ORC5	3.1934	-0.738442	-0.0697492	0.492515
Q96DA2	RAB39B	3.17714	-0.600812	-0.0697458	0.573437
Q9BYC5	FUT8	3.21477	-0.272999	-0.0696402	0.795468
Q9BWL3	C1orf43	2.87147	-0.228557	-0.0694373	0.828016
Q9H4K7	GTPBP5; MTG2	3.19518	-0.24498	-0.0691779	0.815938
P18074-1	ERCC2	3.19009	-0.837148	-0.0691178	0.439628
P42285	SKIV2L2	3.20434	-1.21853	-0.0690378	0.275898
Q96AD5-1	PNPLA2	3.12114	-0.205207	-0.0689343	0.845278
Q9UH62	ARMCX3	3.20179	-0.533471	-0.0686996	0.615928
P78344-1	EIF4G2	3.18029	-0.511142	-0.0686808	0.630412
O14646	CHD1	3.22943	-0.531888	-0.0684396	0.616949
O75879	PET112; GATB	3.14995	-0.482921	-0.0682044	0.648989
Q8NG31-2	CASC5; KNL1	3.08347	-0.714191	-0.0681935	0.506175
Q9NVU7	SDAD1	3.21294	-0.351687	-0.0679097	0.739011
P82673-1	MRPS35	3.32387	-0.516869	-0.0678901	0.626679
Q9BU61-1	NDUFAF3	3.23425	-0.257814	-0.0677127	0.80654
Q96EX1	C1orf212; SMIM12	3.02487	-0.239883	-0.0677075	0.819681
Q15257-1	PPP2R4; PTPA	3.23791	-0.555105	-0.0676599	0.602079
O94915-1	FRYL	3.21588	-0.703169	-0.067643	0.51247
Q6P4R8-1	NFRKB	3.23026	-0.484978	-0.0675809	0.647625
Q14789-2	GOLGB1	3.20666	-1.16795	-0.0674917	0.294053
P37802	TAGLN2	3.17338	-0.590222	-0.0674849	0.579997
Q9BTU6	PI4K2A	3.15073	-0.455597	-0.0672687	0.667253
Q7Z4W1	DCXR	3.19085	-0.603602	-0.0672356	0.571716
Q00169	PITPNA	2.57274	-0.0972393	-0.067184	0.926209
Q8NHP6-1	MOSPD2	3.03716	-0.207853	-0.0671291	0.843317
O75886	STAM2	3.15442	-0.312586	-0.0671279	0.766862
Q9Y253-1	POLH	3.01132	-0.155768	-0.0670361	0.88214
O60341	KDM1A	3.08229	-0.290525	-0.06658	0.782755
Q9Y6D6	ARFGEF1	3.13438	-0.709659	-0.0665375	0.508757
Q53F19	C17orf85; NCBP3	3.18277	-0.386431	-0.0663169	0.714634
Q8N122	RPTOR	3.1207	-0.310031	-0.0662963	0.768696
Q8IY45	AMN1	3.25261	-0.193862	-0.0662814	0.853702
A7MCY6-1	TBKBP1	2.95161	-0.269384	-0.0662376	0.798098
Q96BH1	RNF25	3.24224	-0.635578	-0.0662141	0.552228
Q9NR31	SAR1A	3.14821	-0.82022	-0.0661659	0.448387
P51648	ALDH3A2	3.2532	-0.225548	-0.0661356	0.830234
Q99733	NAP1L4	3.14604	-0.52502	-0.0658616	0.621387
Q9BQI6	ANKRD32; SLF1	3.17111	-0.372518	-0.0658493	0.724352
Q6ZU35	KIAA1211	3.19702	-0.351584	-0.0655731	0.739084
Q7L5N1	COPS6	3.25151	-0.481079	-0.0654831	0.650212
P33981	TTK	3.06685	-0.509738	-0.0654352	0.63133
A6NMZ7-1	COL6A6	3.05491	-0.269006	-0.0654257	0.798374
Q7Z3T8	ZFYVE16	3.1568	-0.357135	-0.0653679	0.735165
O14950	MYL12B; MYL12A	3.18983	-0.644738	-0.0652288	0.546724
Q92615	LARP4B	3.19195	-0.524983	-0.0650756	0.621411
Q63ZY3-1	KANK2	3.14594	-0.409768	-0.0649323	0.698471
P35250-1	RFC2	3.15206	-0.311725	-0.0649085	0.76748
Q8WUA7	TBC1D22A	3.28334	-0.205332	-0.0645949	0.845185
P00966	ASS1	3.26335	-0.35242	-0.064548	0.738493
Q9BY77	POLDIP3	3.18809	-0.415779	-0.0644665	0.694336
O00178	GTPBP1	3.16035	-0.708262	-0.0642277	0.509554
Q92614-1	MYO18A	3.21498	-0.810207	-0.0641525	0.453628
Q5C9Z4	NOM1	3.1136	-0.357794	-0.0638246	0.7347
P62253	UBE2G1	3.17203	-0.439788	-0.0638161	0.677941
P31689-1	DNAJA1	3.0687	-0.6036	-0.0636015	0.571717
Q9H479	FN3K	3.20226	-0.602478	-0.0635833	0.572409
Q9UBC2-2	EPS15L1	3.16634	-1.15275	-0.0634974	0.29971
P19784	CSNK2A2	3.16793	-0.176041	-0.0633385	0.866978
Q9Y3B8-1	REXO2	3.14097	-0.388594	-0.0632166	0.713129
Q9H4L5	OSBPL3	2.90129	-0.198994	-0.0632129	0.849889
Q96S82	UBL7	3.21696	-0.174959	-0.0631983	0.867785
Q01538	MYT1	3.18466	-0.462041	-0.0631976	0.662922
Q9UNY4-1	TTF2	3.12201	-0.968511	-0.0630066	0.376057
P30926-1	CHRNB4	3.11588	-0.158551	-0.062871	0.880055
Q8WZA2	RAPGEF4	3.18819	-0.291819	-0.0628582	0.781819
Q96G04-1	FAM86A; EEF2KMT	3.1103	-0.364027	-0.0628418	0.730312
P31150	GDI1	3.14255	-0.306393	-0.062836	0.771311
O43813	LANCL1	3.15082	-0.408367	-0.0628121	0.699436
P54136-1	RARS	3.20609	-0.636233	-0.0627878	0.551832
P84077	ARF1	3.13622	-0.543018	-0.0624973	0.609794
O43583	DENR	3.21391	-0.376272	-0.062409	0.721724
[truncated: 2,782 more rows]
